# Supplementary material for: An expeditious route to the synthesis of the enantioenriched tetracyclic core of ergot alkaloids via an organocatalytic aldol reaction
Source: Royal Society of Chemistry journal article supplement (doi:10.1039/c7ob03069j), 2018-01-01
Supplement: c7ob03069j1.pdf [file c7ob03069j1.pdf]

Supplemental material for:

**Expeditious Route to Enantioenriched Tetracyclic Core of  
Ergot Alkaloids via Organocatalytic Aldol Reaction**

Subhajit Bhunia,<sup>§</sup> Saikat Chauduri,<sup>§</sup> Subhadip De, K. Naresh Babu, and Alakesh Bisai\*

*Department of Chemistry, Indian Institute of Science Education and Research Bhopal, Bhopal*

*Bypass Road, Bhauri, Bhopal - 462 066, Madhya Pradesh, INDIA.*

E-Mail: [alakesh@iiserb.ac.in](mailto:alakesh@iiserb.ac.in)

**Table of Contents**

|                                                                            |        |
|----------------------------------------------------------------------------|--------|
| <sup>1</sup> H, <sup>13</sup> C and mass spectral graphics and HPLC traces | S2-S60 |
|----------------------------------------------------------------------------|--------|

**Spectral Graphics and HPLC Traces**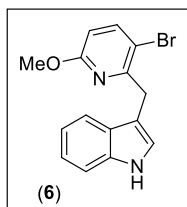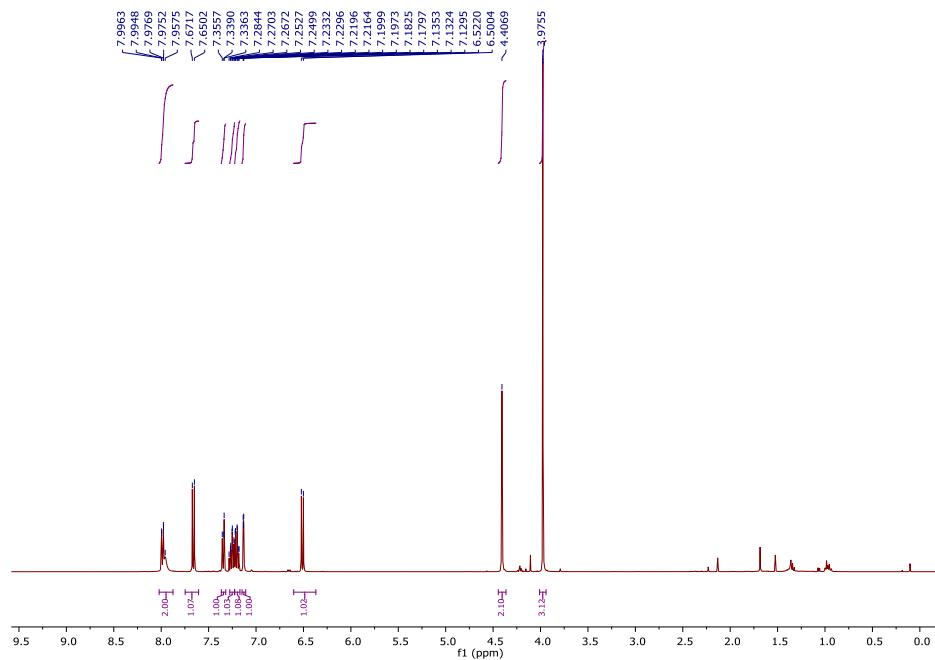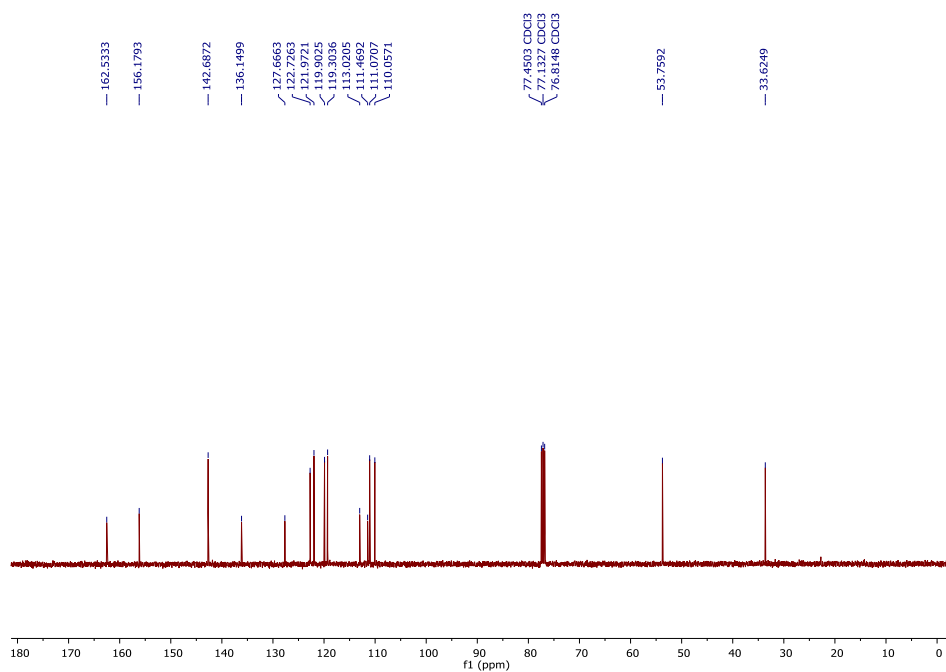

## Display Report

## Analysis Info

Analysis Name D:\Data\user data\2015\NOV-2015\18-NOV-2015\Dr.A.Bisai-SB4-022\_1-C,2\_01\_4284.d  
Method HRLCMS-20 Sept.m  
Sample Name Dr.A.Bisai-SB4-022  
Comment

Acquisition Date 11/18/2015 3:34:16 PM

Operator RUCHI

Instrument micrOTOF-Q II 10330

## Acquisition Parameter

|             |          |                       |           |                  |           |
|-------------|----------|-----------------------|-----------|------------------|-----------|
| Source Type | ESI      | Ion Polarity          | Positive  | Set Nebulizer    | 1.2 Bar   |
| Focus       | Active   | Set Capillary         | 4500 V    | Set Dry Heater   | 200 °C    |
| Scan Begin  | 50 m/z   | Set End Plate Offset  | -500 V    | Set Dry Gas      | 7.0 l/min |
| Scan End    | 3000 m/z | Set Collision Cell RF | 130.0 Vpp | Set Divert Valve | Waste     |

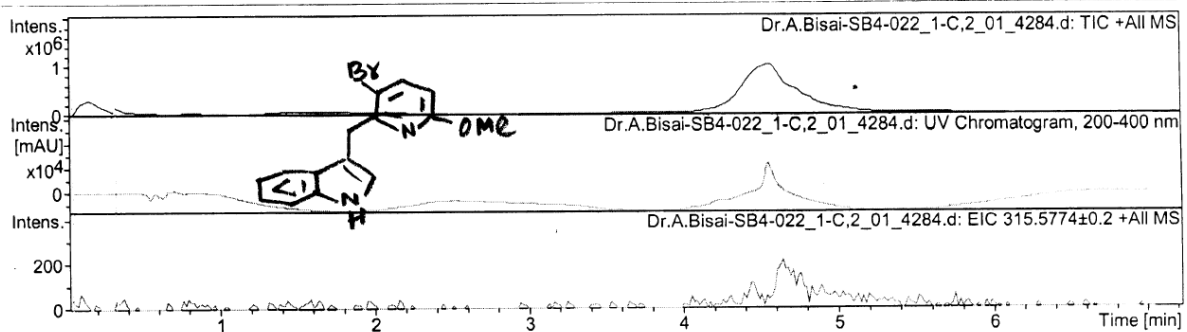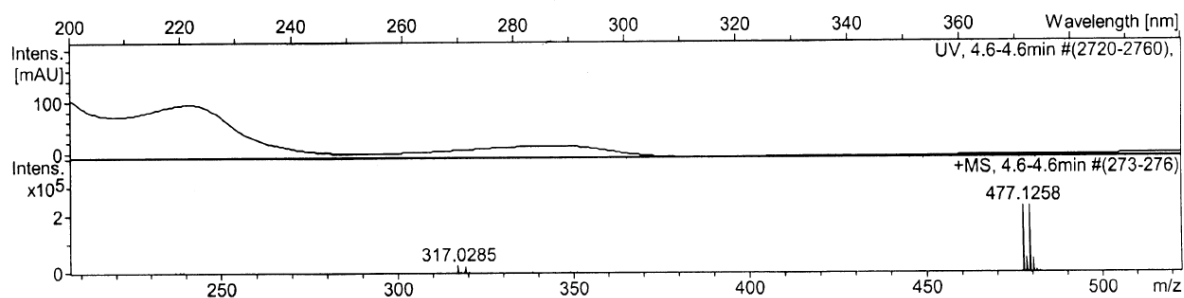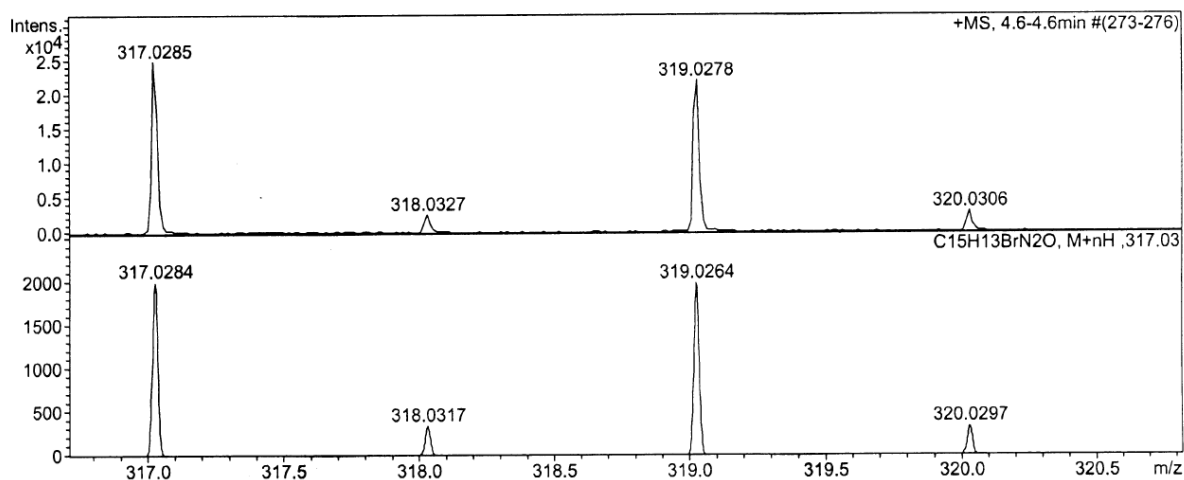

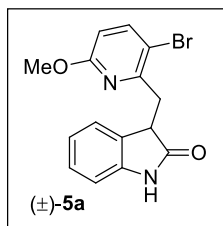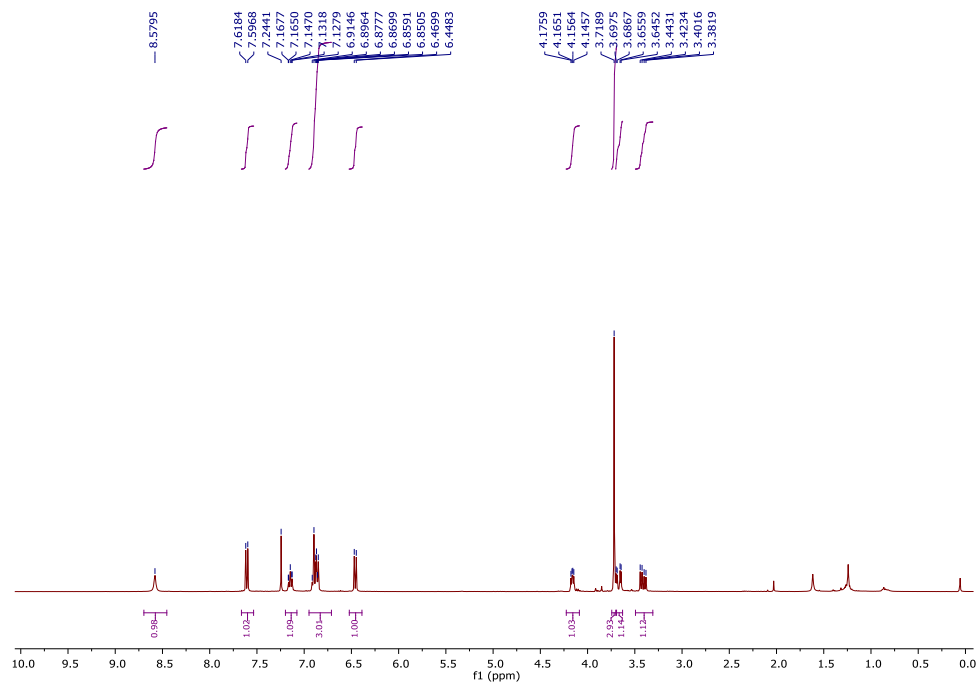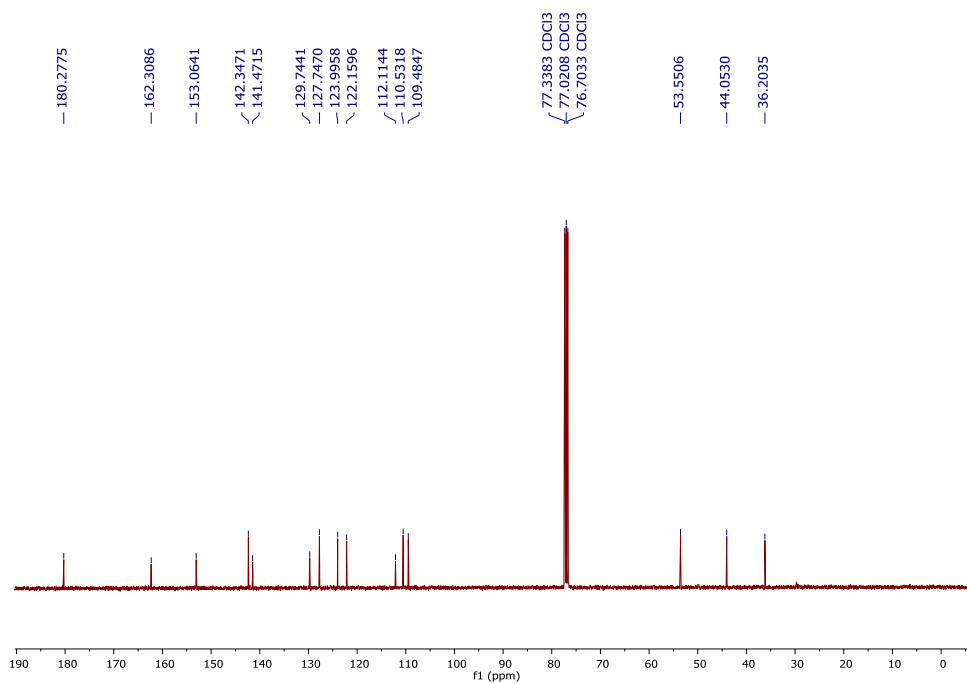



## Display Report

## Analysis Info

Analysis Name D:\Data\user data\2015\NOV-2015\18-NOV-2015\Dr.A. Bisai-SB4-023\_1-B,8\_01\_4282.d  
Method HRLCMS-20 Sept.m  
Sample Name Dr.A.Bisai-SB4-023  
Comment

Acquisition Date 11/18/2015 3:13:59 PM

Operator RUCHI

Instrument micrOTOF-Q II 10330

## Acquisition Parameter

|             |          |                       |           |                  |           |
|-------------|----------|-----------------------|-----------|------------------|-----------|
| Source Type | ESI      | Ion Polarity          | Positive  | Set Nebulizer    | 1.2 Bar   |
| Focus       | Active   | Set Capillary         | 4500 V    | Set Dry Heater   | 200 °C    |
| Scan Begin  | 50 m/z   | Set End Plate Offset  | -500 V    | Set Dry Gas      | 7.0 l/min |
| Scan End    | 3000 m/z | Set Collision Cell RF | 130.0 Vpp | Set Divert Valve | Waste     |

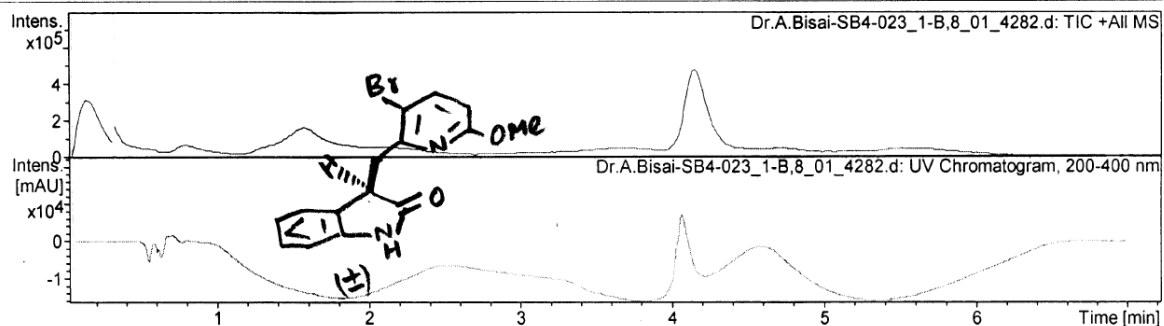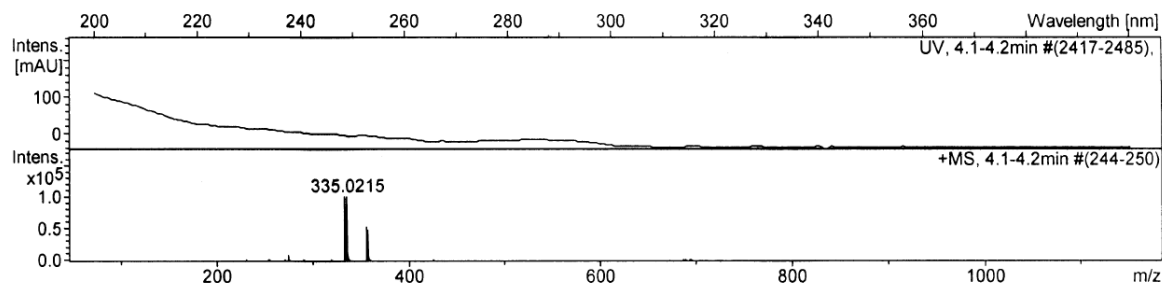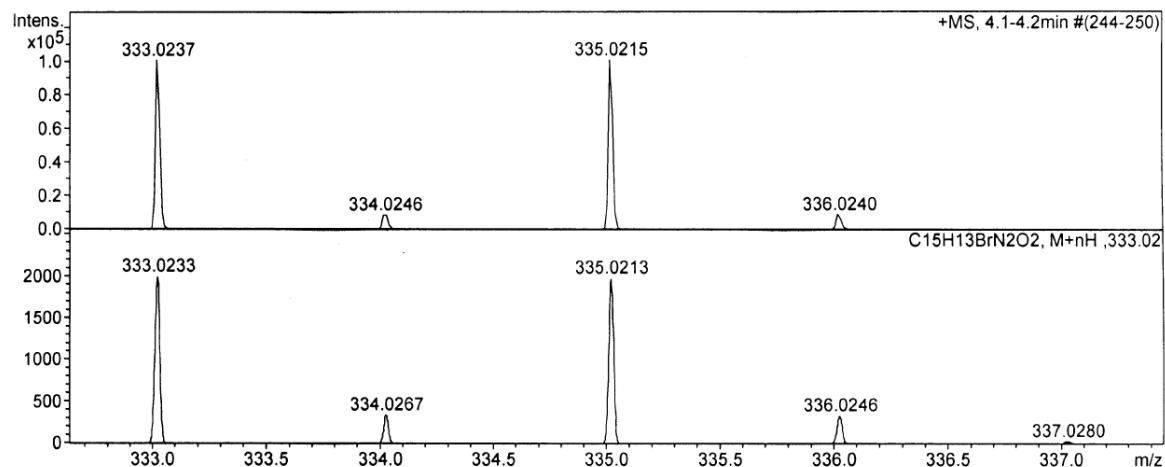

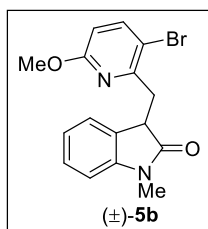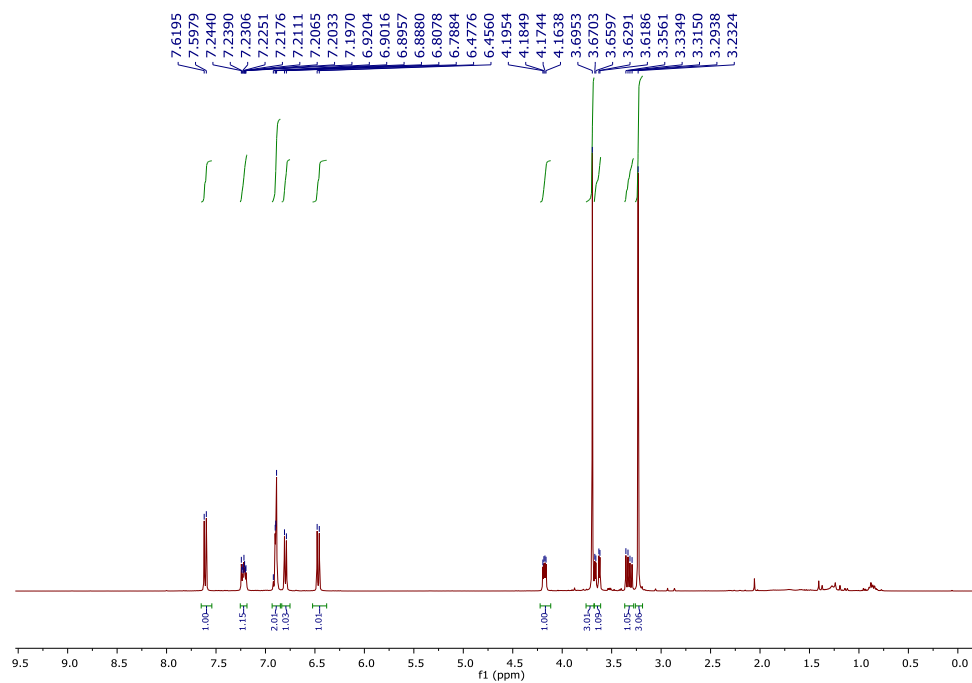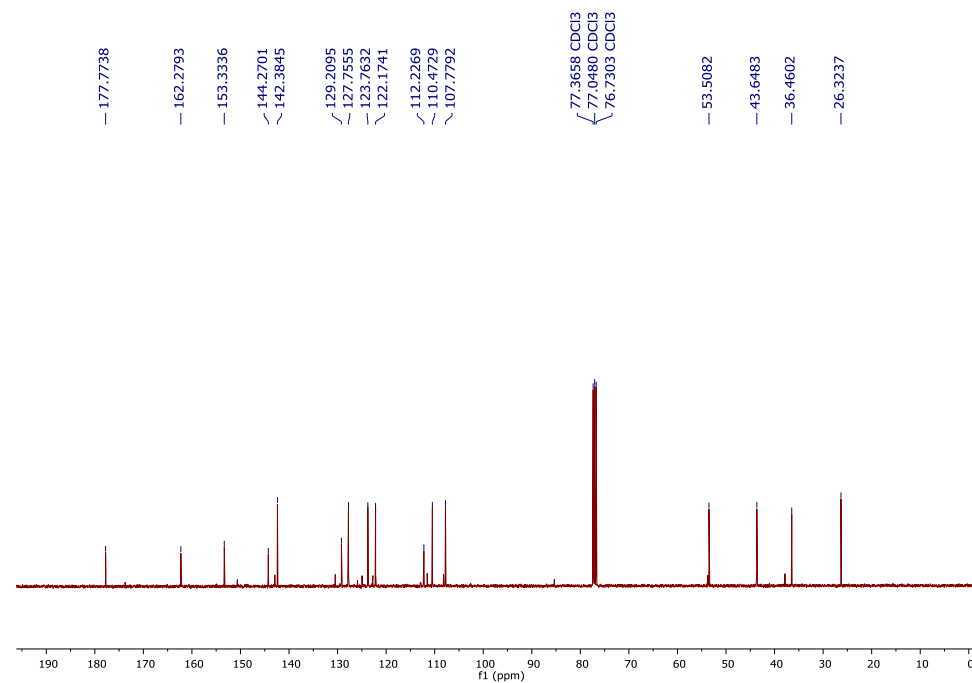

## Display Report

## Analysis Info

Analysis Name D:\Data\user data\2016\JAN-2016\20-JAN-2016\Dr.A.Bisai-SB4-168\_1-A,4\_01\_5054.d  
Method HRLCMS-20 Sept.m  
Sample Name Dr.A.Bisai-SB4-168  
Comment

Acquisition Date 1/20/2016 12:40:56 PM  
Operator RUCHI  
Instrument micrOTOF-Q II 10330

## Acquisition Parameter

|             |          |                       |           |                  |           |
|-------------|----------|-----------------------|-----------|------------------|-----------|
| Source Type | ESI      | Ion Polarity          | Positive  | Set Nebulizer    | 1.2 Bar   |
| Focus       | Active   | Set Capillary         | 4500 V    | Set Dry Heater   | 200 °C    |
| Scan Begin  | 50 m/z   | Set End Plate Offset  | -500 V    | Set Dry Gas      | 7.0 l/min |
| Scan End    | 3000 m/z | Set Collision Cell RF | 130.0 Vpp | Set Divert Valve | Waste     |

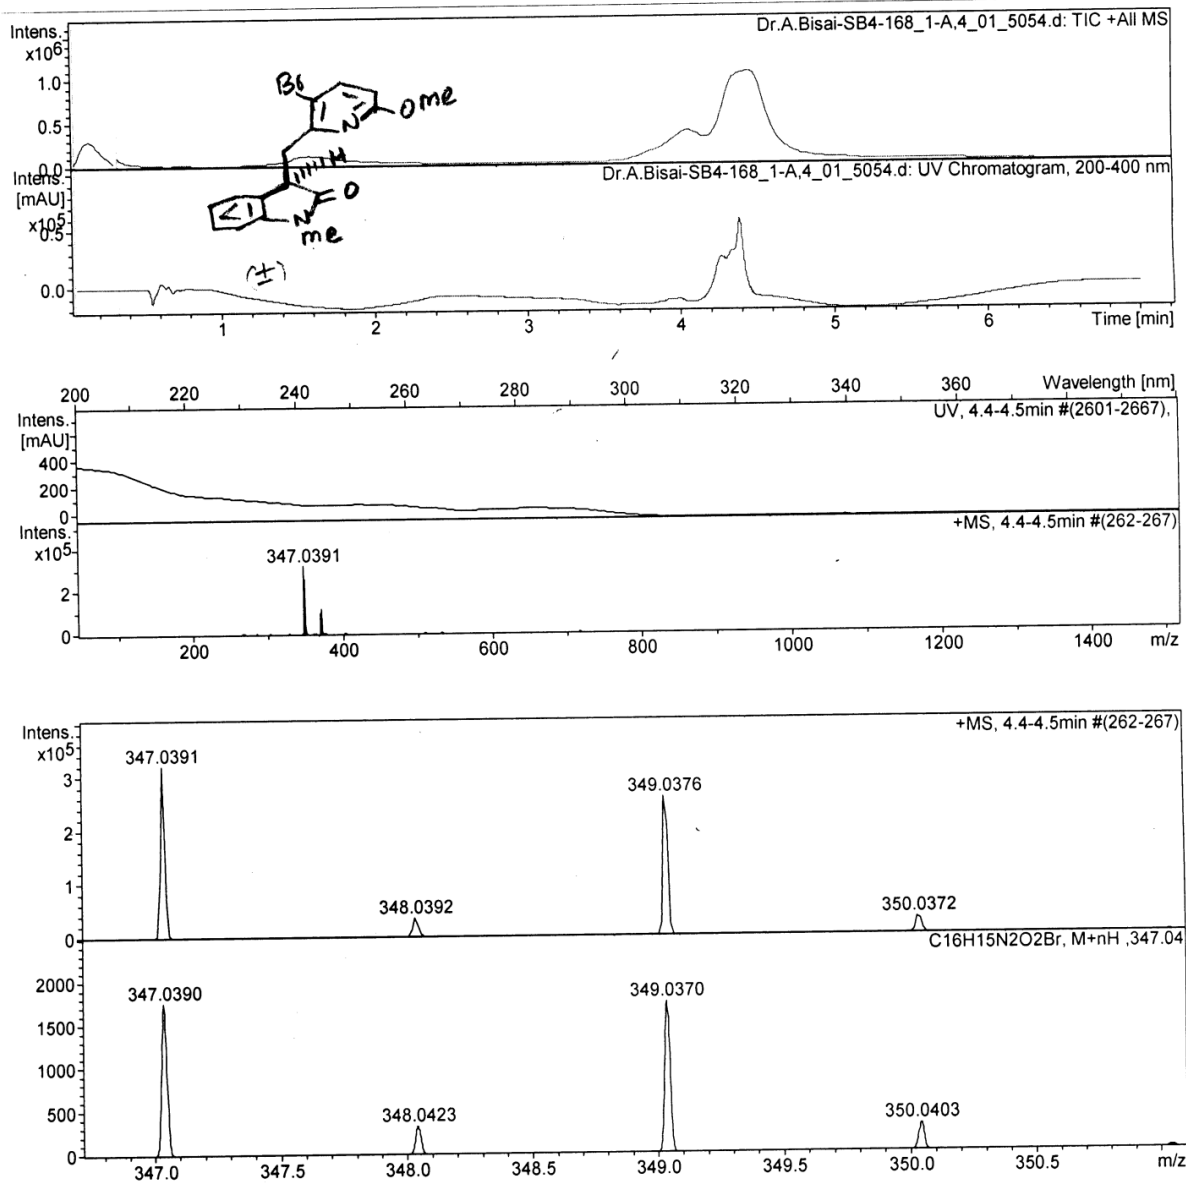

Scanned copy of mass spectrum of (±)-5b

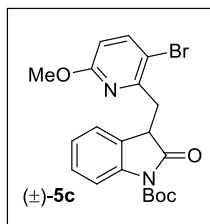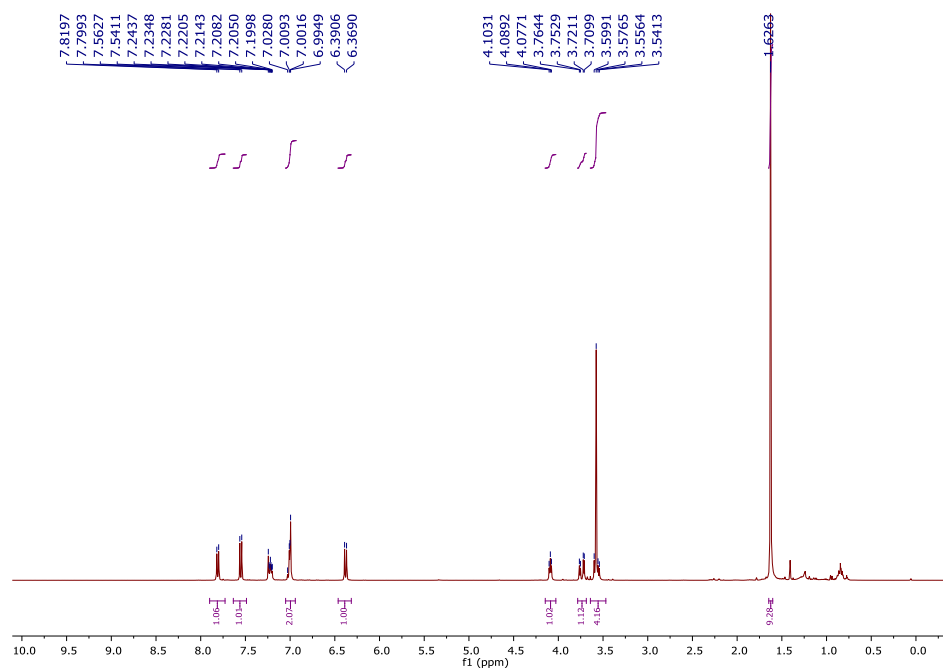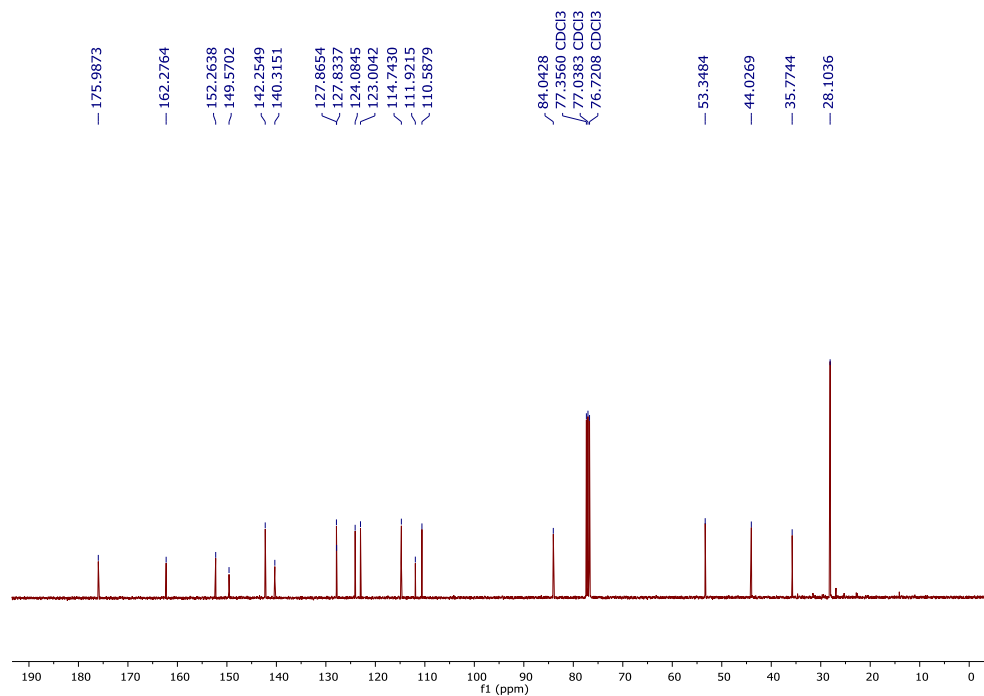

## Display Report

## Analysis Info

Analysis Name D:\Data\user data\2015\December-2015\30-12-2015\Dr.A.Bisai-SB7-173\_1-A,4\_01\_4778.d  
 Method HRLCMS-20 Sept tune wide.m  
 Sample Name Dr.A.Bisai-SB7-173  
 Comment

Acquisition Date 12/30/2015 3:11:28 PM

Operator RUCHI

Instrument micrOTOF-Q II 10330

## Acquisition Parameter

Source Type ESI  
 Focus Not active  
 Scan Begin 50 m/z  
 Scan End 3000 m/z

Ion Polarity Positive  
 Set Capillary 4500 V  
 Set End Plate Offset -500 V  
 Set Collision Cell RF 600.0 Vpp

Set Nebulizer 1.2 Bar  
 Set Dry Heater 200 °C  
 Set Dry Gas 7.0 l/min  
 Set Divert Valve Waste

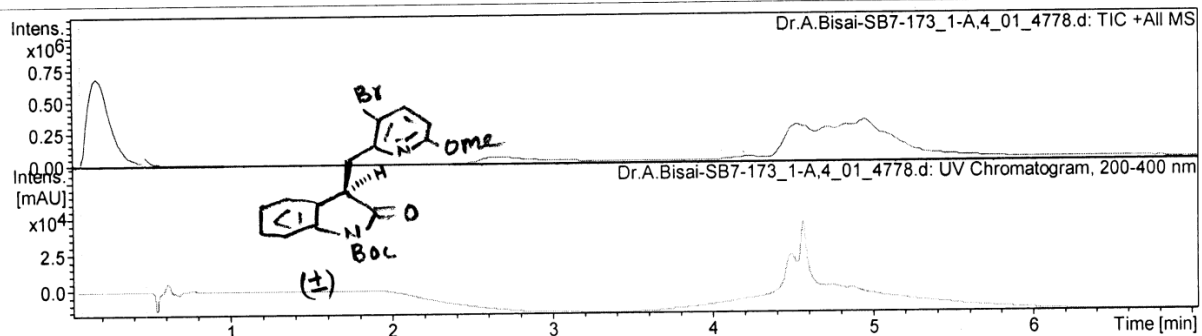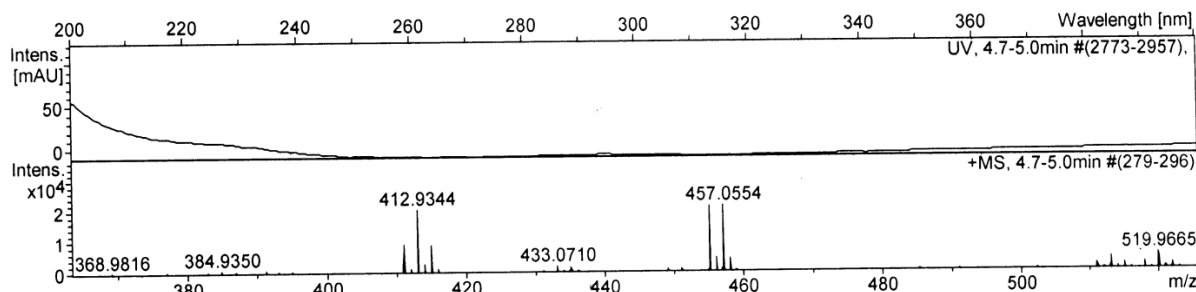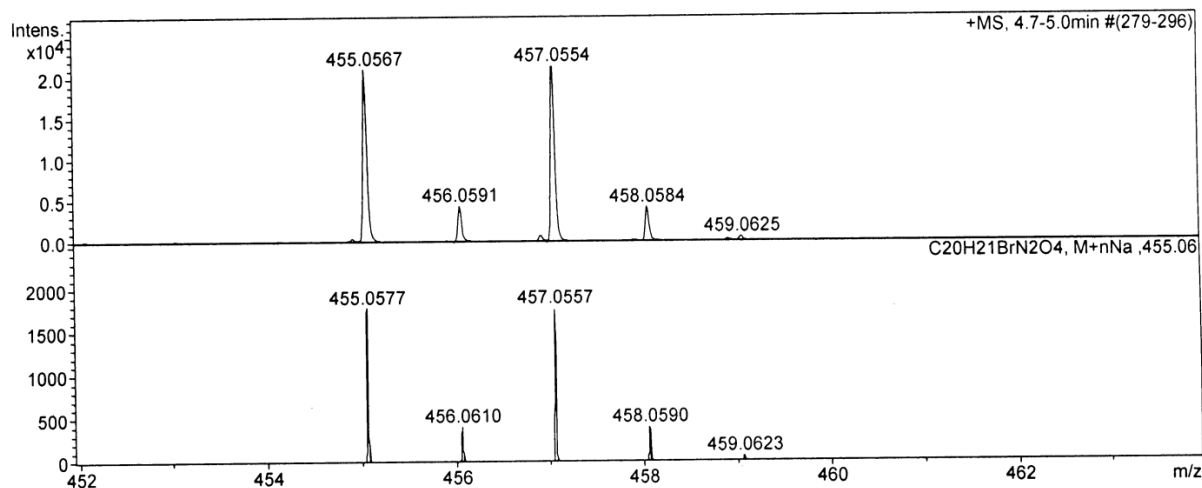

Scanned copy of mass spectrum of (±)-5c

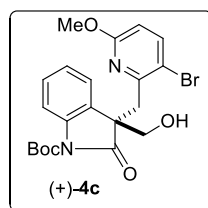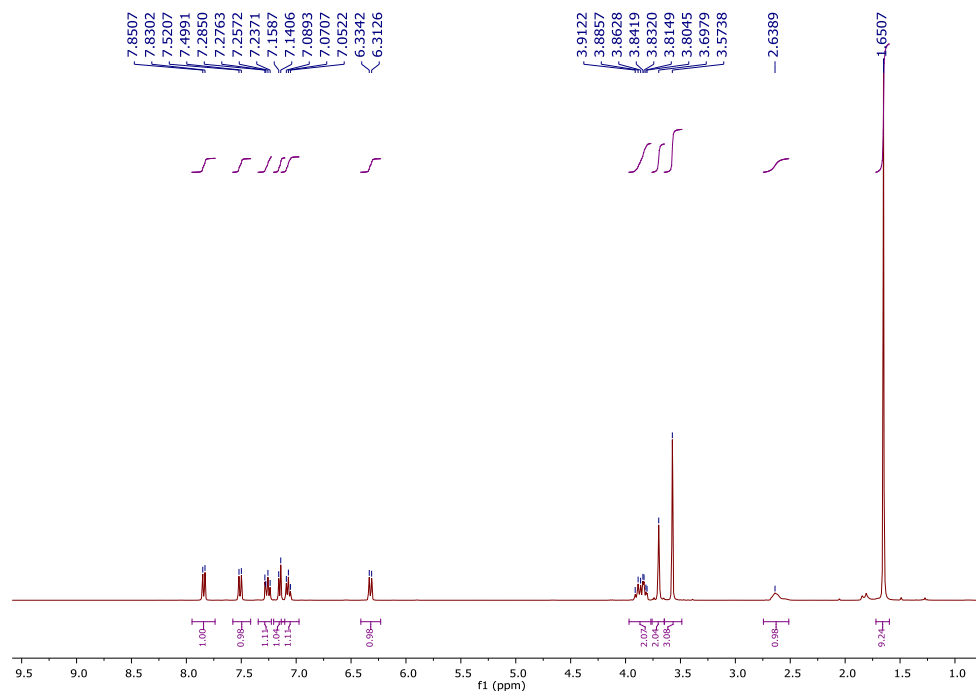

$^1\text{H}$  NMR (400 MHz,  $\text{CDCl}_3$ ) of (+)-**4c**

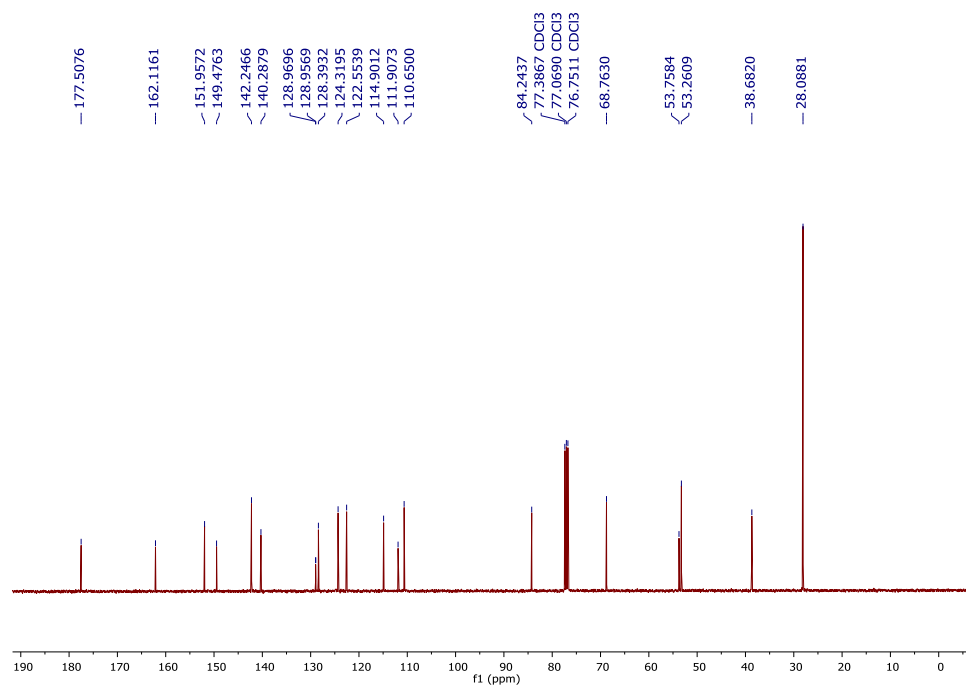

$^{13}\text{C}$  NMR (100 MHz,  $\text{CDCl}_3$ ) of (+)-**4c**

## Display Report

## Analysis Info

|               |                                                                                |                  |                       |
|---------------|--------------------------------------------------------------------------------|------------------|-----------------------|
| Analysis Name | D:\Data\user data\2015\NOV-2015\18-NOV-2015\Dr.A.Bisai-SB4-172_1-C,3_01_4285.d | Acquisition Date | 11/18/2015 3:42:26 PM |
| Method        | HRLCMS-20 Sept tune wide.m                                                     | Operator         | RUCHI                 |
| Sample Name   | Dr.A.Bisai-SB4-172                                                             | Instrument       | microTOF-Q II 10330   |
| Comment       |                                                                                |                  |                       |

## Acquisition Parameter

|             |            |                       |           |                  |           |
|-------------|------------|-----------------------|-----------|------------------|-----------|
| Source Type | ESI        | Ion Polarity          | Positive  | Set Nebulizer    | 1.2 Bar   |
| Focus       | Not active | Set Capillary         | 4500 V    | Set Dry Heater   | 200 °C    |
| Scan Begin  | 50 m/z     | Set End Plate Offset  | -500 V    | Set Dry Gas      | 7.0 l/min |
| Scan End    | 3000 m/z   | Set Collision Cell RF | 600.0 Vpp | Set Divert Valve | Waste     |

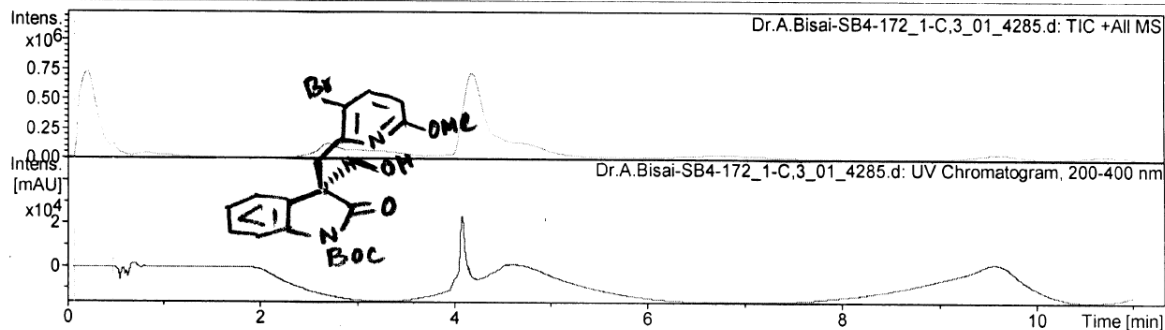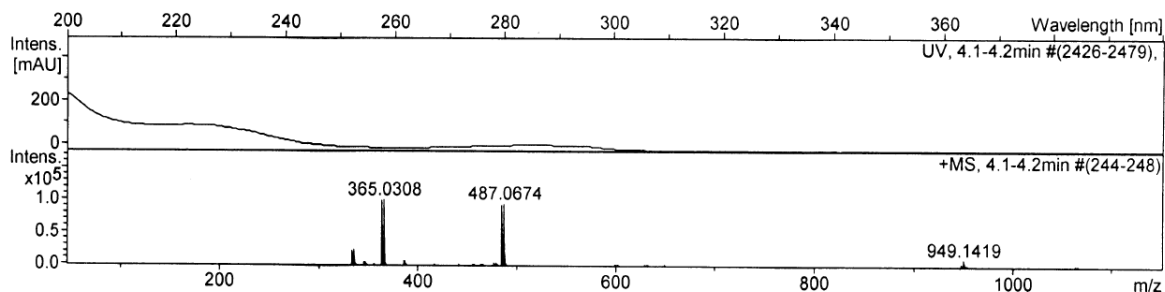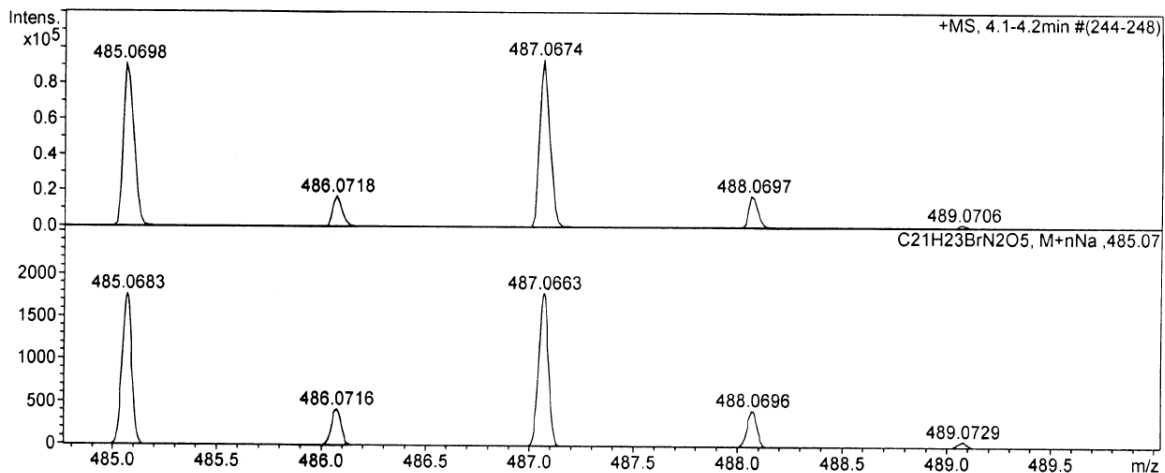

Scanned copy of mass spectrum of (+)-4c

**HPLC traces of compound (+)-4c**

Data File C:\CHEM32\1\DATA\SUBHAJIT\2014-02-03AB-SB4-172-IB-5-254-0P5-150.D

Sample Name: AB-SB4-172-IB-5-254-0P5-150

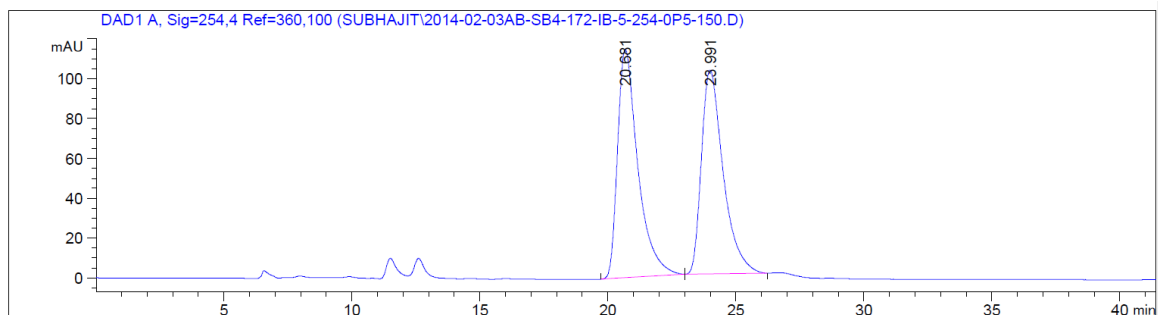

| Peak # | RetTime [min] | Type | Width [min] | Area [mAU*s] | Height [mAU] | Area %  |
|--------|---------------|------|-------------|--------------|--------------|---------|
| 1      | 20.681        | BB   | 0.8284      | 6332.52051   | 114.64787    | 51.1372 |
| 2      | 23.991        | BB   | 0.8935      | 6050.86328   | 102.38645    | 48.8628 |

**Racemic**

Data File C:\CHEM32\1\DATA\SUBHAJIT\2014-02-14AB-SB4-214-IB-5-254-0P5-30.D

Sample Name: AB-SB4-214-IB-5-254-0P5-30

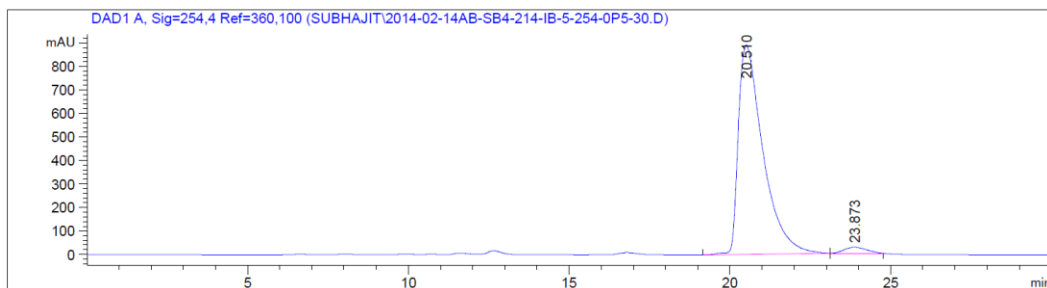

| Peak # | RetTime [min] | Type | Width [min] | Area [mAU*s] | Height [mAU] | Area %  |
|--------|---------------|------|-------------|--------------|--------------|---------|
| 1      | 20.510        | BB   | 0.7999      | 4.72932e4    | 890.00598    | 97.4805 |
| 2      | 23.873        | BBA  | 0.7653      | 1222.36719   | 25.58911     | 2.5195  |

**Enantiopure**



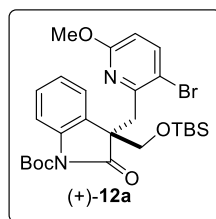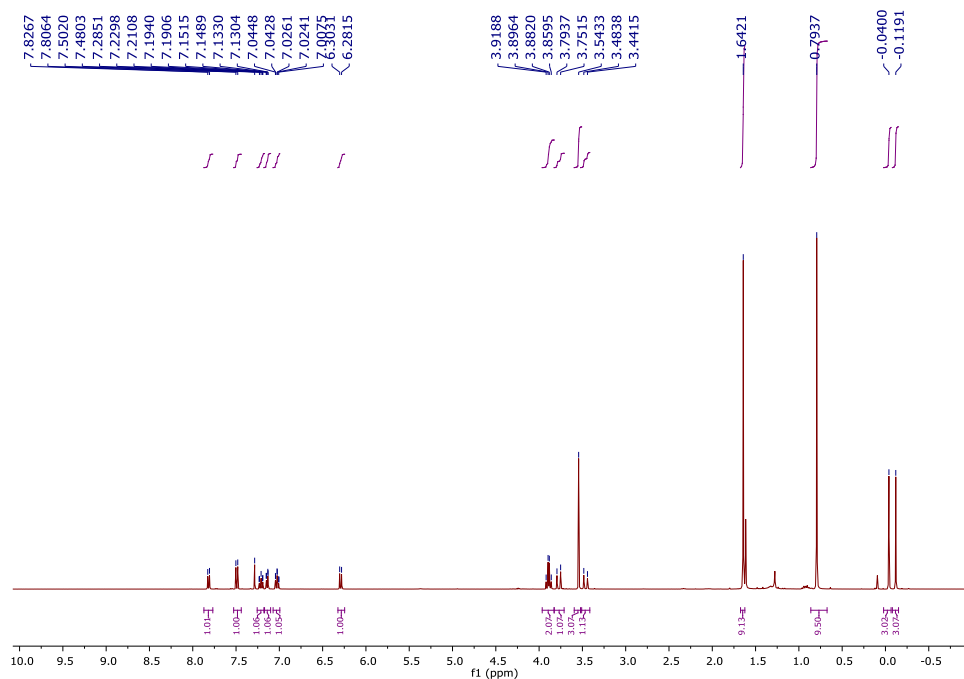

$^1\text{H}$  NMR (400 MHz,  $\text{CDCl}_3$ ) of (+)-12a

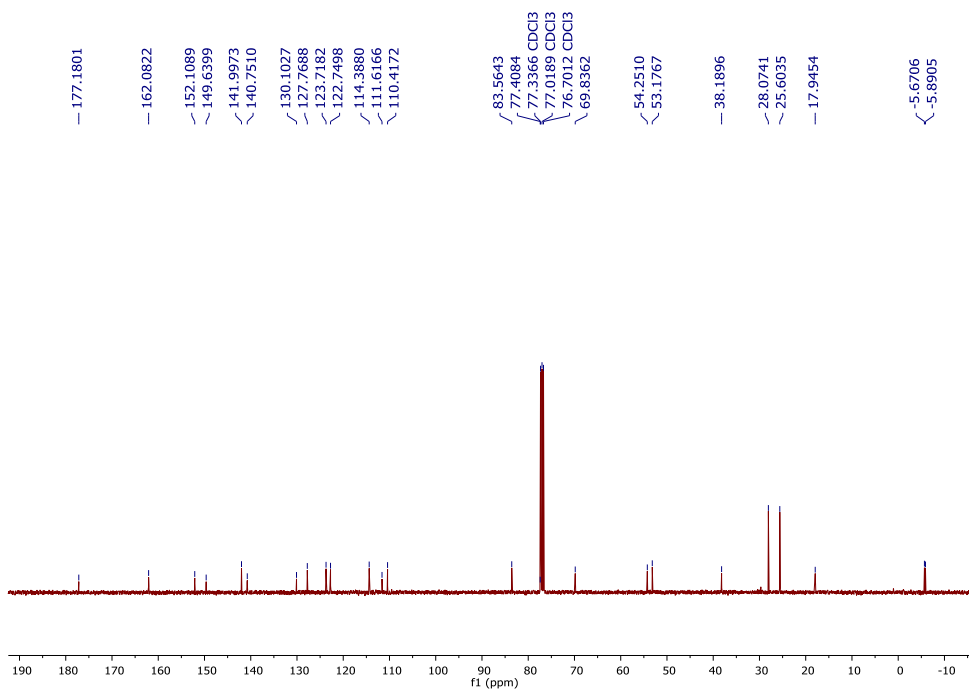

$^{13}\text{C}$  NMR (100 MHz,  $\text{CDCl}_3$ ) of (+)-12a

## Display Report

## Analysis Info

Analysis Name D:\Data\user data\2014\AUGUST\22 AUG\Dr.A.Bisai-AB-SB-221.d  
Method tune\_wide.m  
Sample Name AB-SB-221  
Comment

Acquisition Date 8/22/2014 4:03:24 AM

Operator Ravindra  
Instrument micrOTOF-Q II 10330

## Acquisition Parameter

|             |            |                       |           |                  |           |
|-------------|------------|-----------------------|-----------|------------------|-----------|
| Source Type | ESI        | Ion Polarity          | Positive  | Set Nebulizer    | 0.4 Bar   |
| Focus       | Not active | Set Capillary         | 4500 V    | Set Dry Heater   | 180 °C    |
| Scan Begin  | 50 m/z     | Set End Plate Offset  | -500 V    | Set Dry Gas      | 4.0 l/min |
| Scan End    | 3000 m/z   | Set Collision Cell RF | 600.0 Vpp | Set Divert Valve | Waste     |

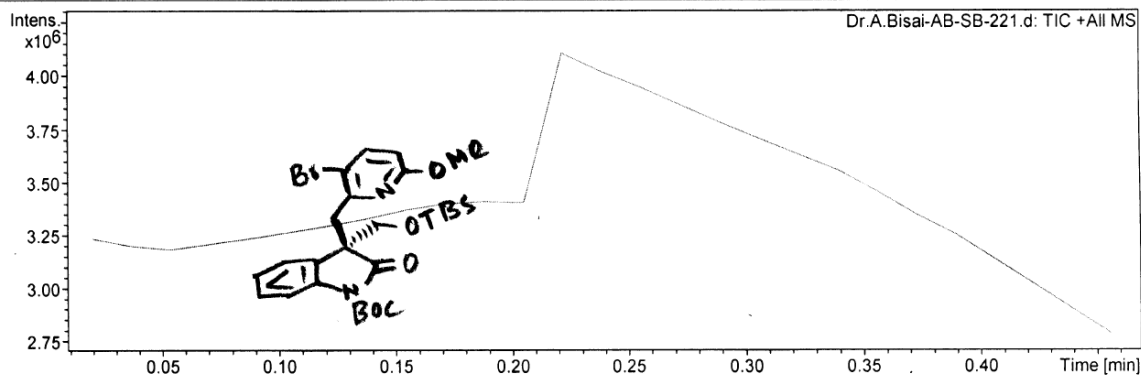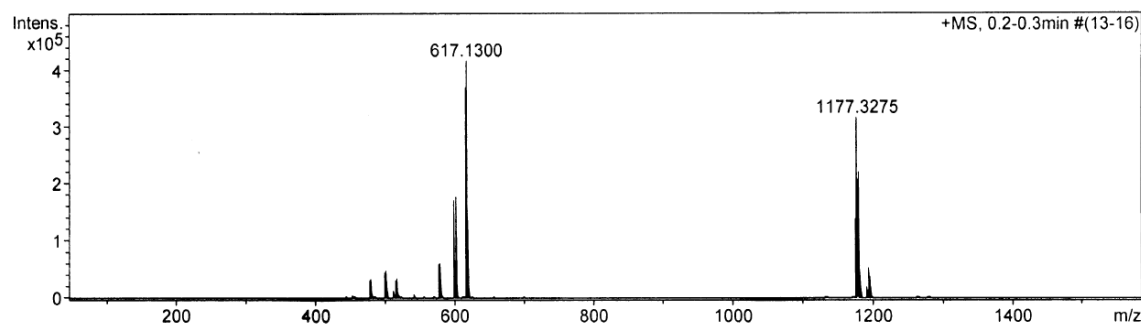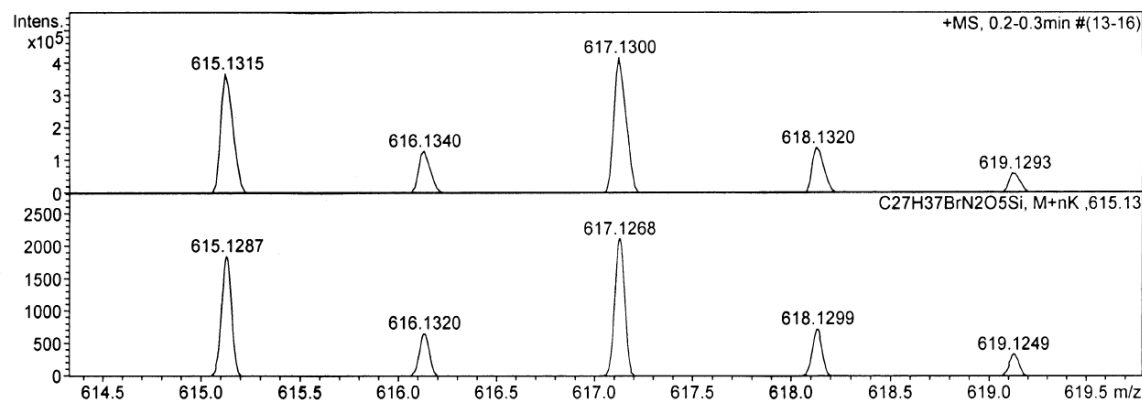

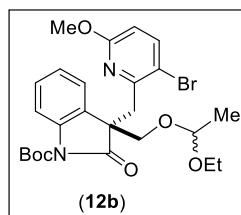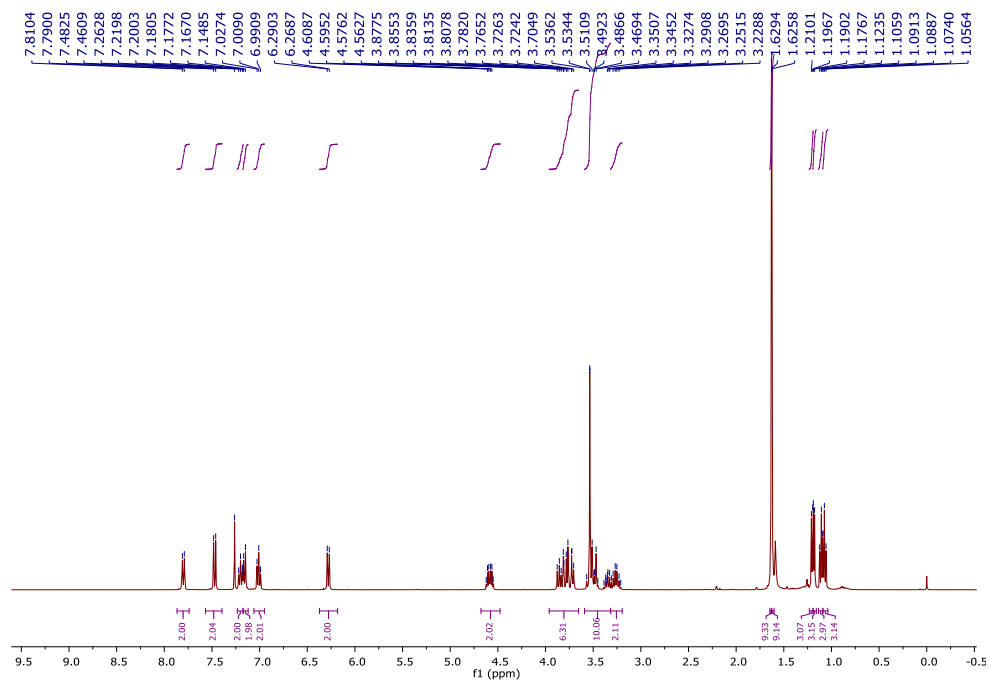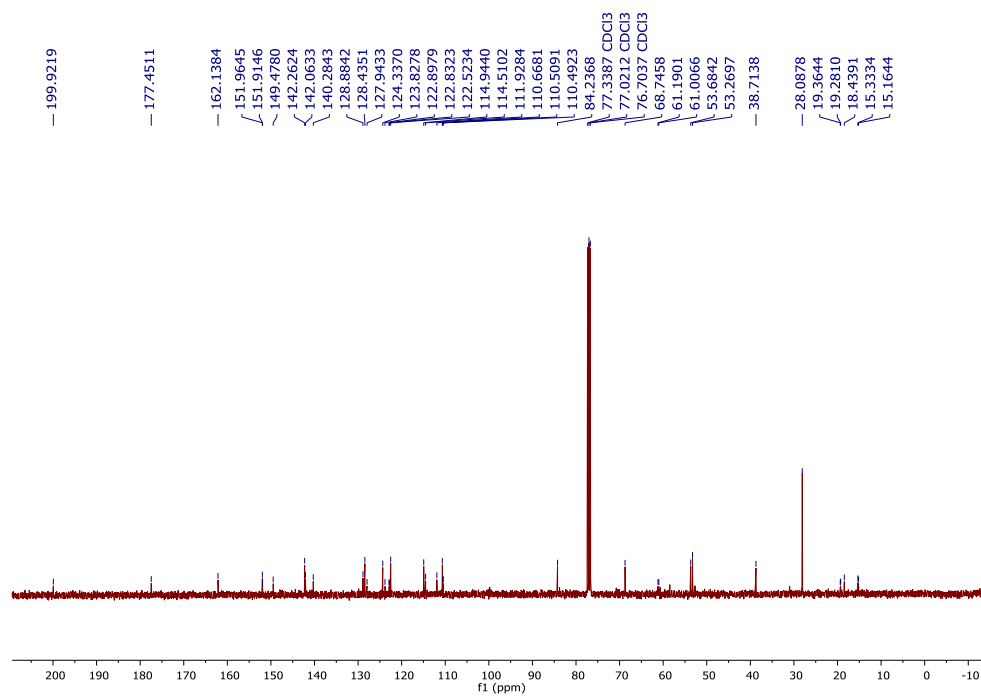

## Display Report

## Analysis Info

Analysis Name D:\Data\user data\2014\AUG\EST\22 AUG\Dr.A.Bisai-AB-SB4-240-1.d  
Method tune\_wide.m  
Sample Name AB-SB4-240-1  
Comment

Acquisition Date 8/22/2014 5:06:48 AM

Operator Ravindra  
Instrument micrOTOF-Q II 10330

## Acquisition Parameter

|             |            |                       |           |                  |           |
|-------------|------------|-----------------------|-----------|------------------|-----------|
| Source Type | ESI        | Ion Polarity          | Positive  | Set Nebulizer    | 0.4 Bar   |
| Focus       | Not active | Set Capillary         | 4500 V    | Set Dry Heater   | 180 °C    |
| Scan Begin  | 50 m/z     | Set End Plate Offset  | -500 V    | Set Dry Gas      | 4.0 l/min |
| Scan End    | 3000 m/z   | Set Collision Cell RF | 800.0 Vpp | Set Divert Valve | Waste     |

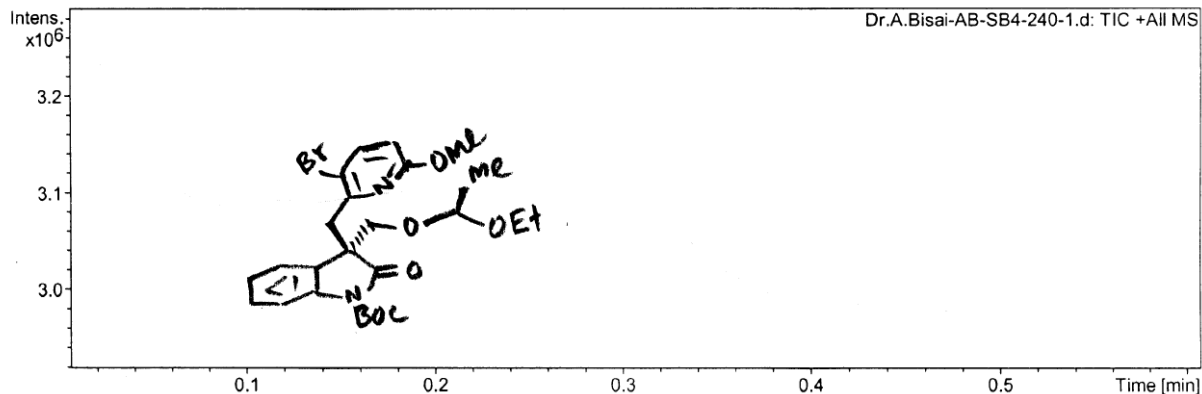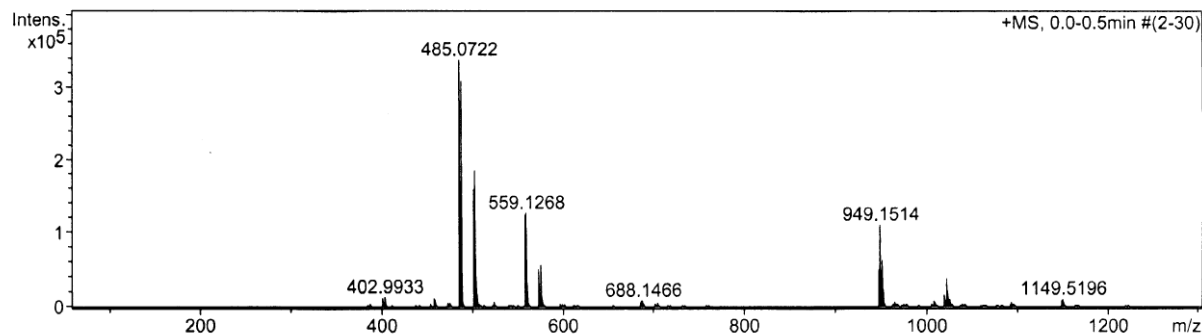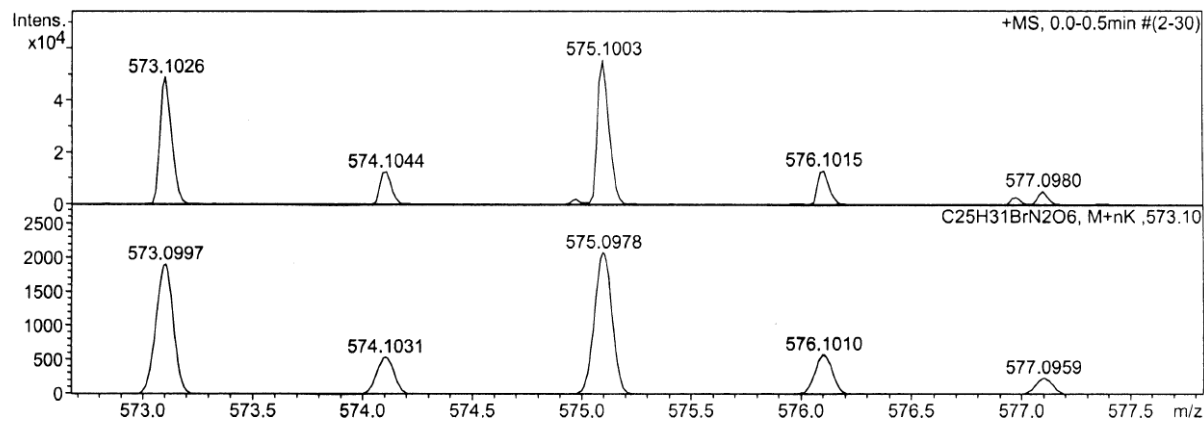

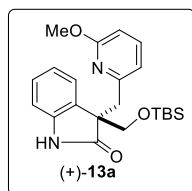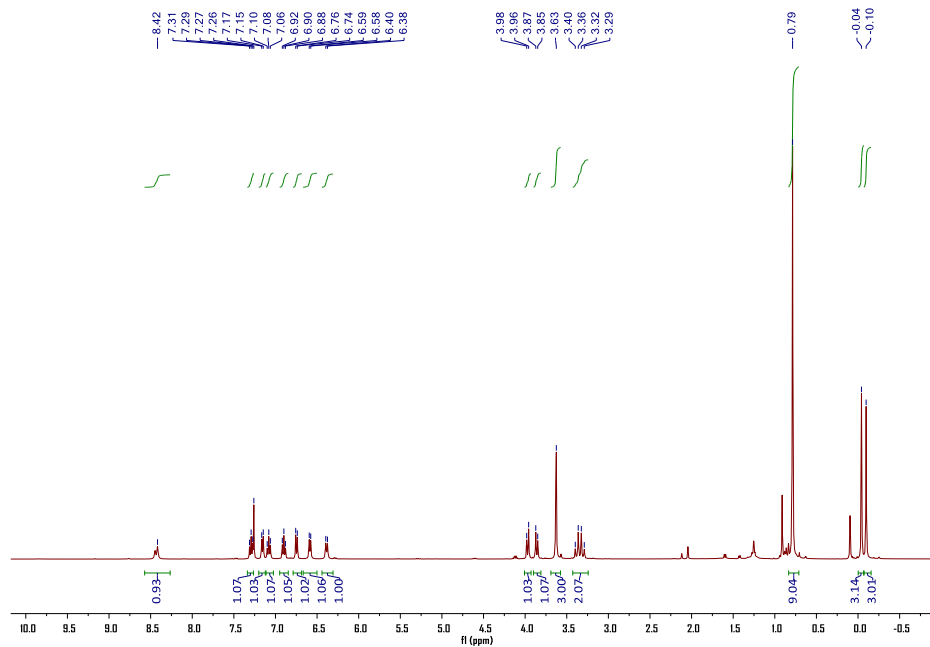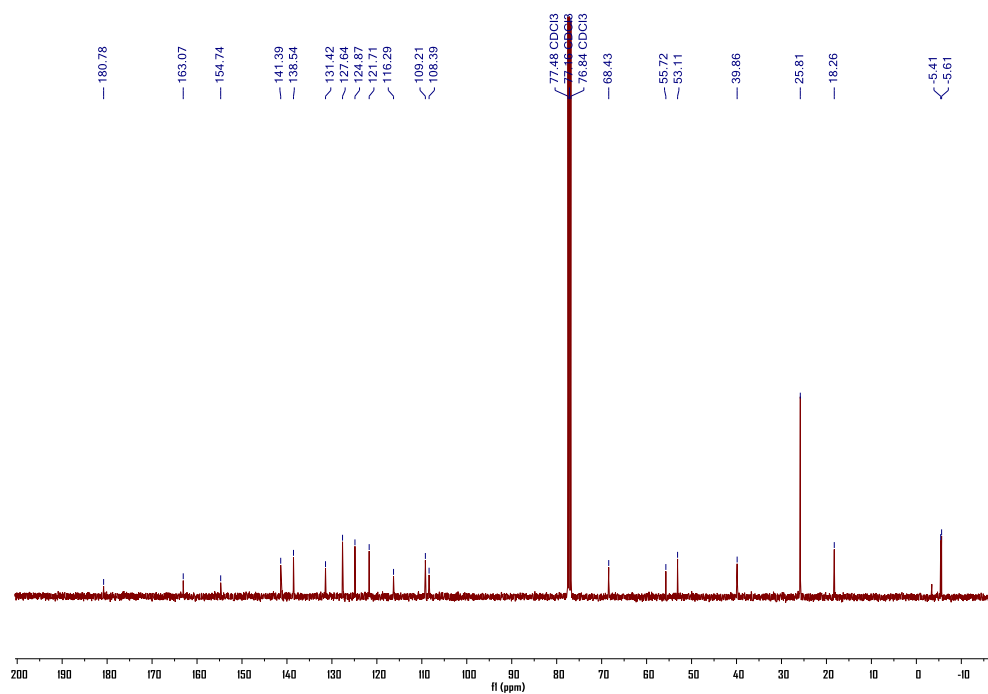

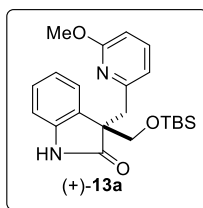

## Mass Spectrum SmartFormula Report

### Analysis Info

Acquisition Date 2/7/2018 5:49:08 AM

Sample Name 2016307-SB-07-13-N-SI  
Comment

Instrument / Ser# maXis 4G 21240

### Acquisition Parameter

|             |            |                       |           |                  |           |
|-------------|------------|-----------------------|-----------|------------------|-----------|
| Source Type | ESI        | Ion Polarity          | Positive  | Set Nebulizer    | 1.0 Bar   |
| Focus       | Not active | Set Capillary         | 4000 V    | Set Dry Heater   | 220 °C    |
| Scan Begin  | 50 m/z     | Set End Plate Offset  | -500 V    | Set Dry Gas      | 6.0 l/min |
| Scan End    | 1500 m/z   | Set Collision Cell RF | 600.0 Vpp | Set Divert Valve | Waste     |

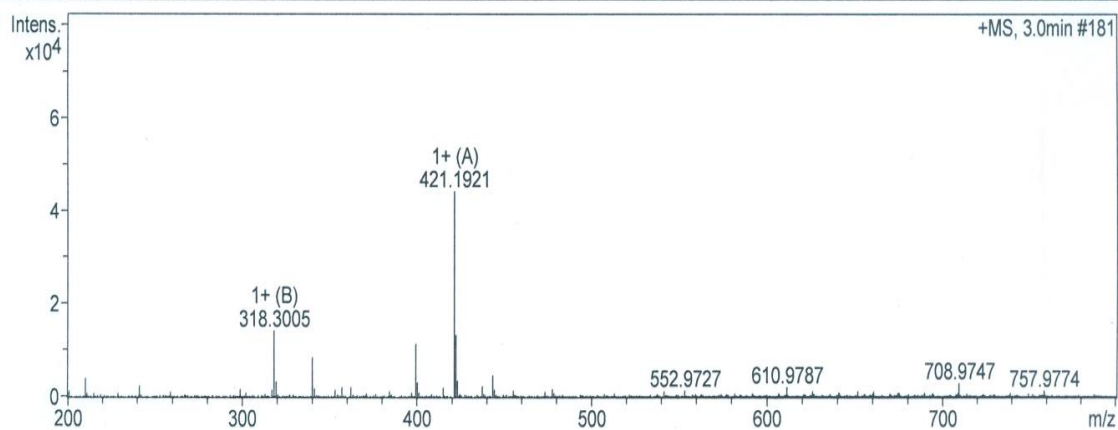

| Meas. m/z | # | Formula                                                            | Score  | m/z      | err [ppm] | Mean err [ppm] | mSig ma | rdb | e <sup>-</sup> Conf | N-R ule |
|-----------|---|--------------------------------------------------------------------|--------|----------|-----------|----------------|---------|-----|---------------------|---------|
| 421.1921  | 1 | C <sub>22</sub> H <sub>30</sub> N <sub>2</sub> NaO <sub>3</sub> Si | 100.00 | 421.1918 | -0.7      | -1.3           | 2.9     | 9.5 | even                | ok      |

Mass spectrum of compound (+)-13a

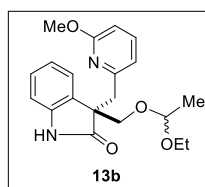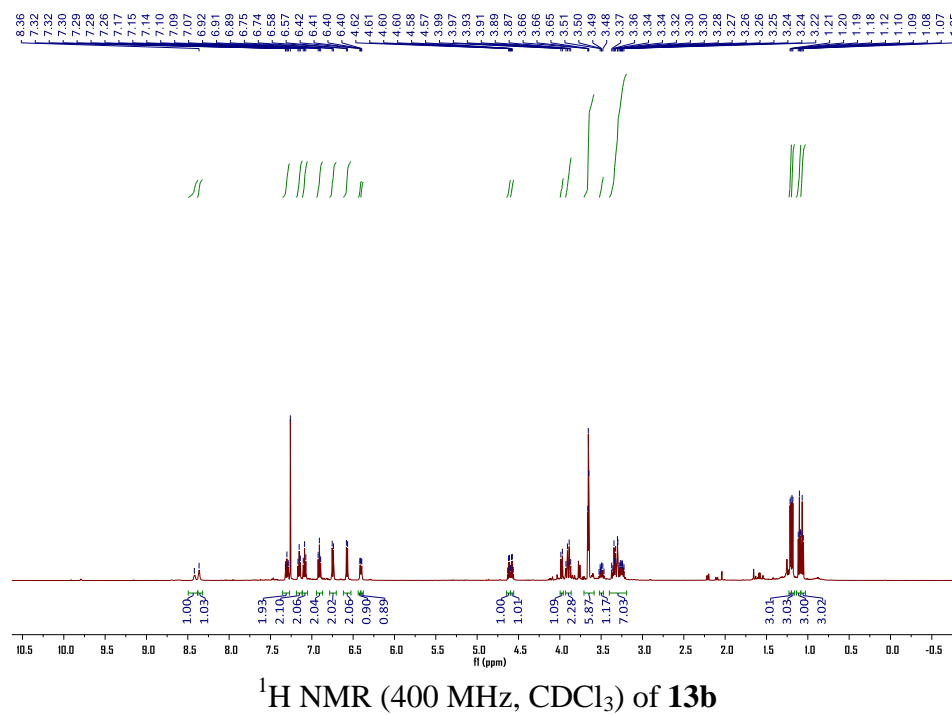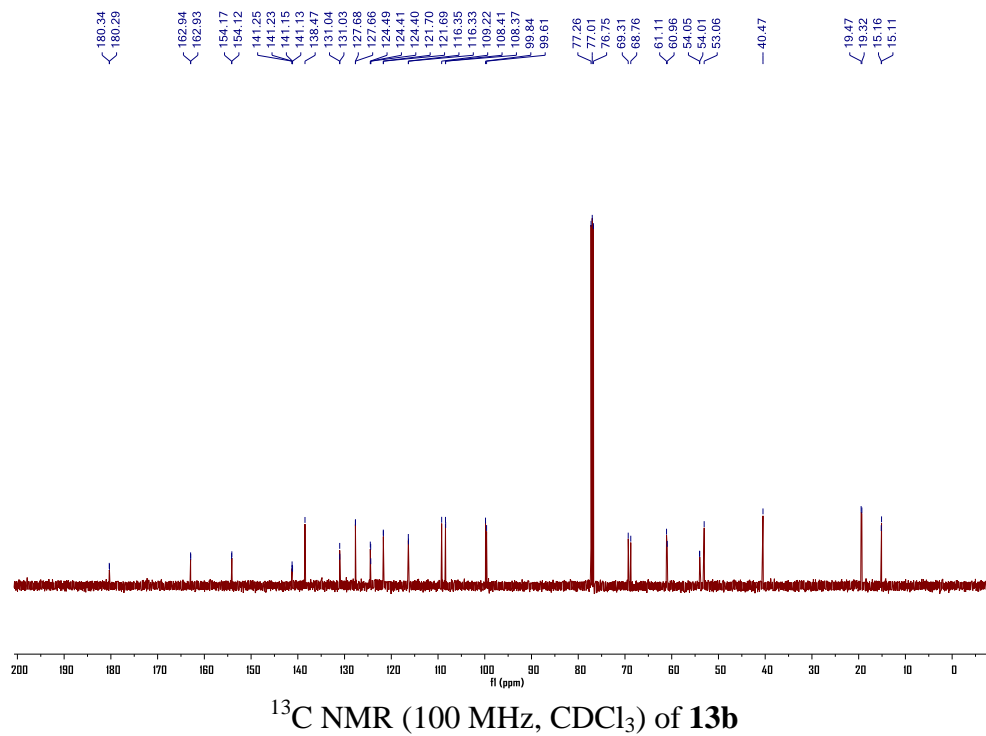

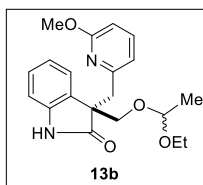

## Mass Spectrum SmartFormula Report

### Analysis Info

Acquisition Date 2/7/2018 5:49:08 AM

Sample Name 2016307-SB-07-13-N-OE  
Comment

Instrument / Ser# maXis 4G 21240

### Acquisition Parameter

|             |            |                       |           |                  |           |
|-------------|------------|-----------------------|-----------|------------------|-----------|
| Source Type | ESI        | Ion Polarity          | Positive  | Set Nebulizer    | 1.0 Bar   |
| Focus       | Not active | Set Capillary         | 4000 V    | Set Dry Heater   | 220 °C    |
| Scan Begin  | 50 m/z     | Set End Plate Offset  | -500 V    | Set Dry Gas      | 6.0 l/min |
| Scan End    | 1500 m/z   | Set Collision Cell RF | 600.0 Vpp | Set Divert Valve | Waste     |

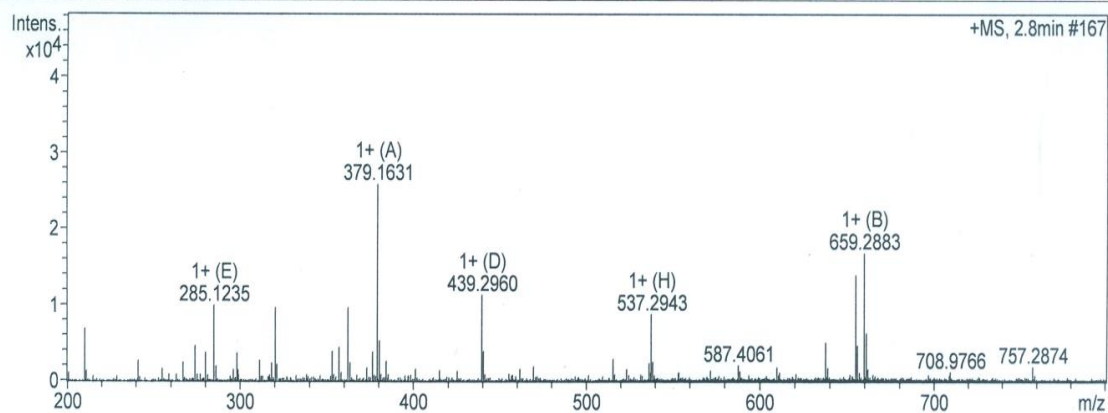

| Meas. m/z | # | Formula              | Score  | m/z      | err [ppm] | Mean err [ppm] | mSig | rdb | e <sup>-</sup> Conf | N-R ule |
|-----------|---|----------------------|--------|----------|-----------|----------------|------|-----|---------------------|---------|
| 379.1631  | 1 | C 20 H 24 N 2 Na O 4 | 100.00 | 379.1628 | -0.7      | -0.8           | 11.5 | 9.5 | even                | ok      |

Mass spectrum of compound **13b**



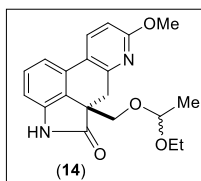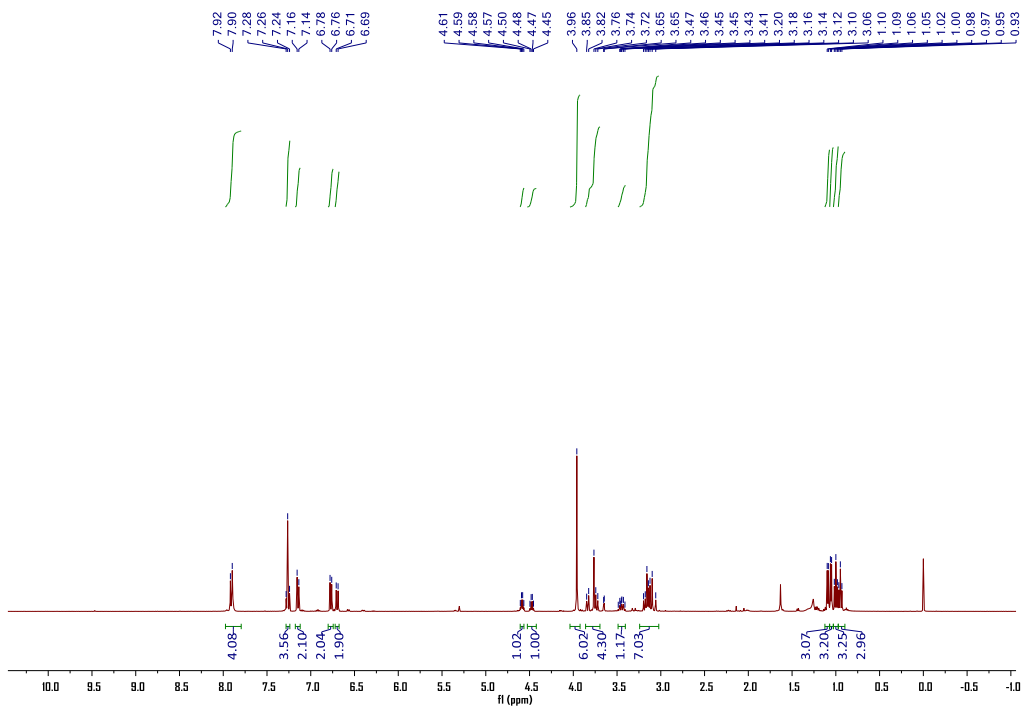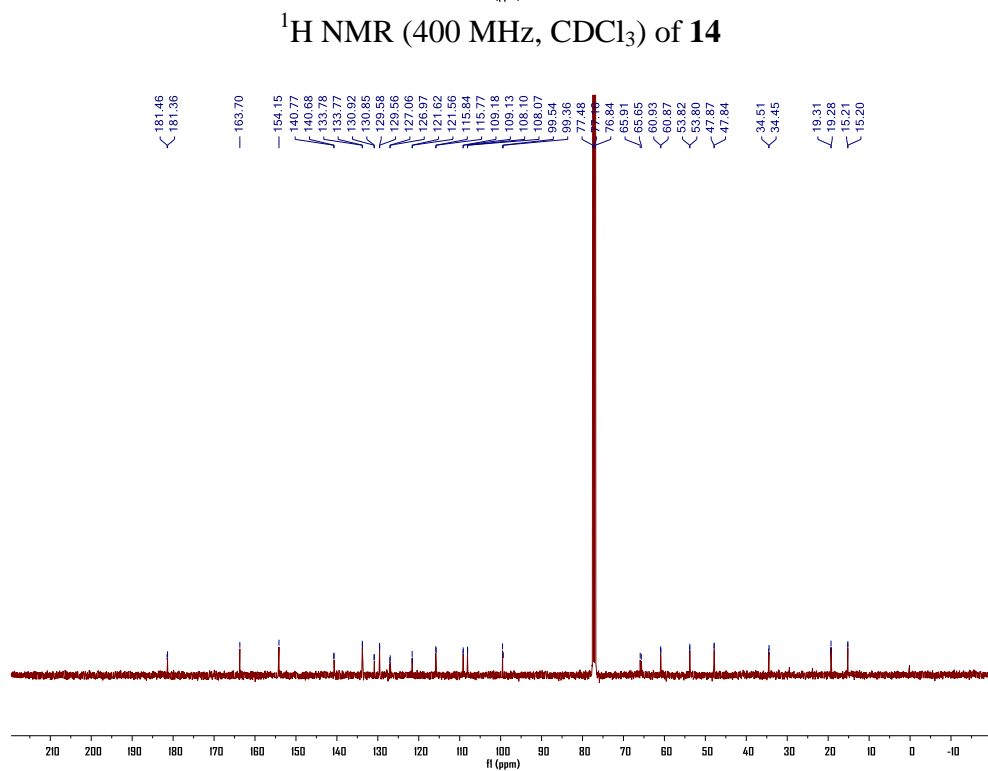

## Display Report

## Analysis Info

Analysis Name D:\Data\user data\2014\MARCH\10 march\Dr.A.Bisai-AB-SB4-242\_1-A,5\_01\_2049.d  
 Method HRLCMS-20 Sept.m  
 Sample Name Dr.A.Bisai-AB-SB4-242  
 Comment

Acquisition Date 3/10/2014 2:06:24 PM  
 Operator Amit  
 Instrument micrOTOF-Q II 10330

## Acquisition Parameter

|             |          |                       |           |                  |           |
|-------------|----------|-----------------------|-----------|------------------|-----------|
| Source Type | ESI      | Ion Polarity          | Positive  | Set Nebulizer    | 1.2 Bar   |
| Focus       | Active   | Set Capillary         | 4500 V    | Set Dry Heater   | 200 °C    |
| Scan Begin  | 50 m/z   | Set End Plate Offset  | -500 V    | Set Dry Gas      | 7.0 l/min |
| Scan End    | 3000 m/z | Set Collision Cell RF | 130.0 Vpp | Set Divert Valve | Waste     |

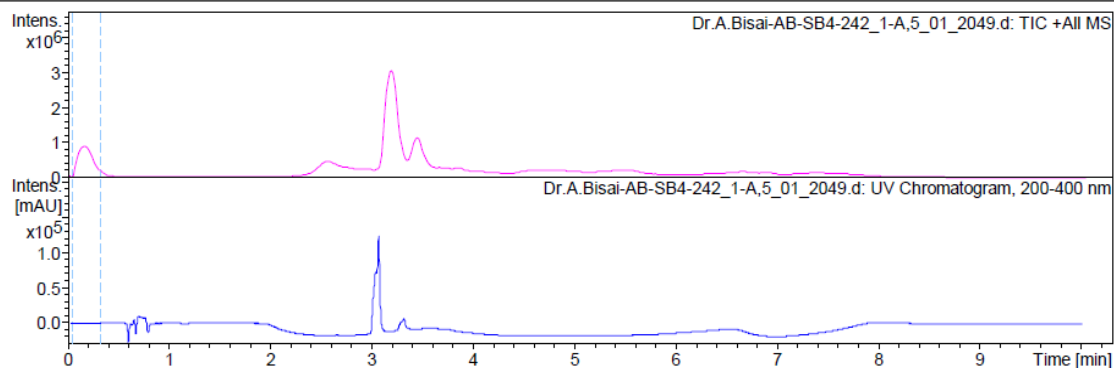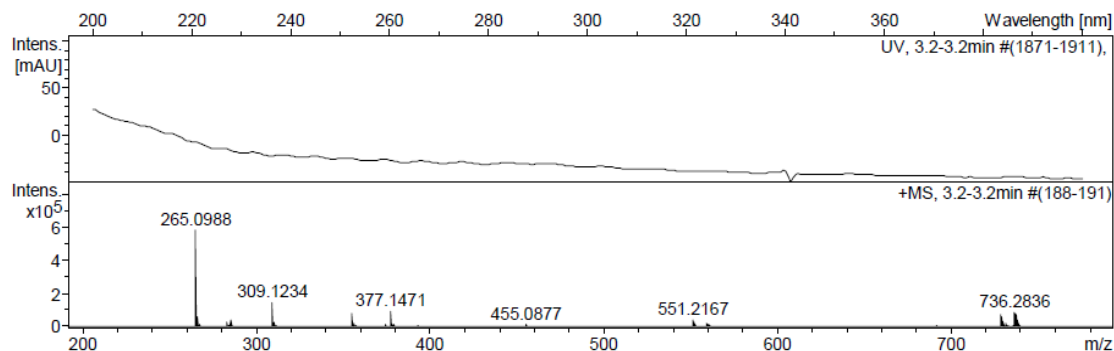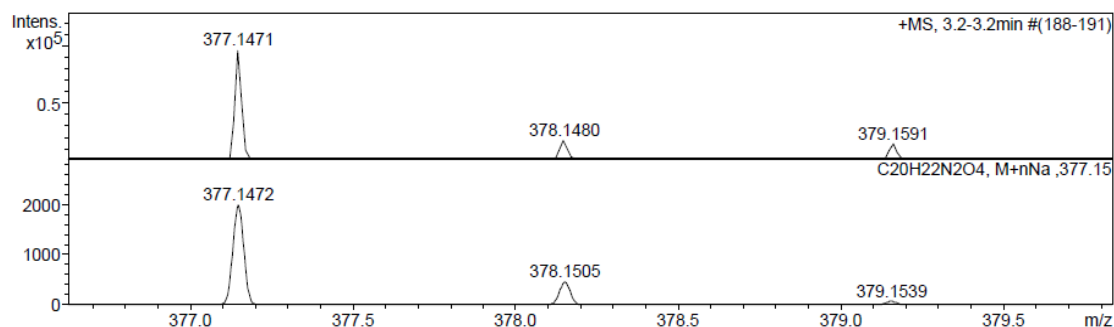Mass spectrum of compound **14**

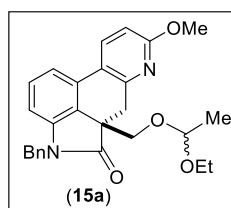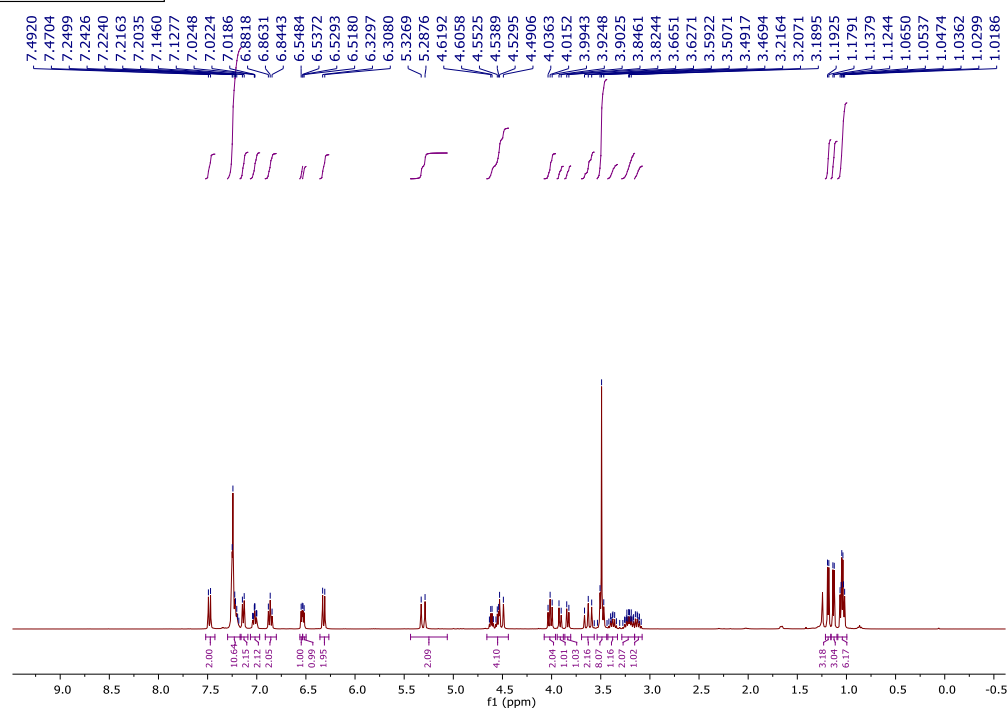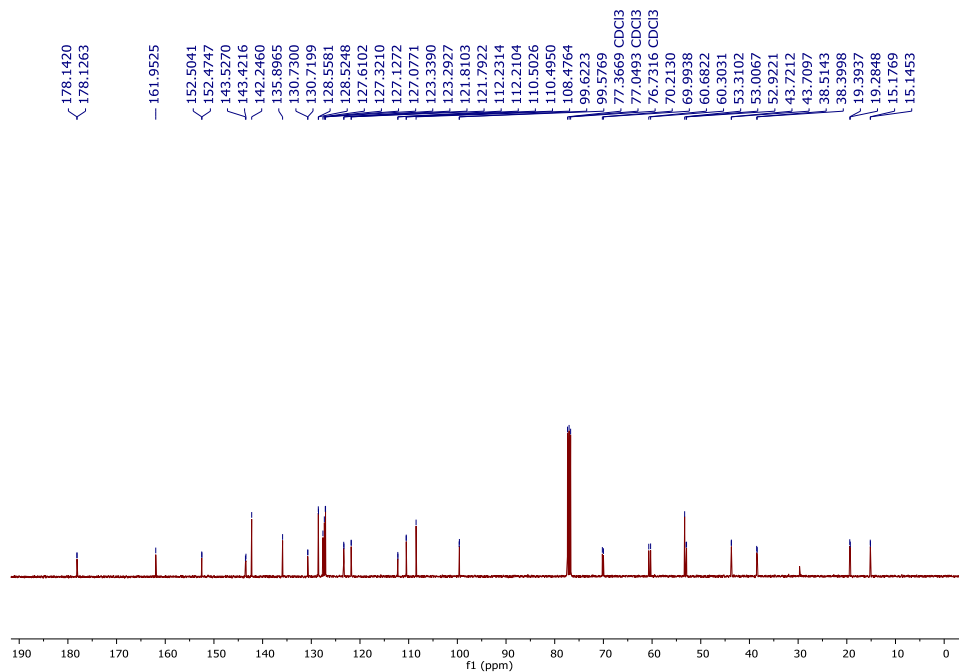

## Display Report

## Analysis Info

Analysis Name D:\Data\user data\2014\APRIL\01 APR\Dr.A.Bisai-SB4-269\_1-A,2\_01\_2149.d Acquisition Date 4/2/2014 3:47:32 AM  
Method HRLCMS-20 Sept.m Operator Amit  
Sample Name Dr.A.Bisai-SB4-269 Instrument micrOTOF-Q II 10330  
Comment

## Acquisition Parameter

|             |          |                       |           |                  |           |
|-------------|----------|-----------------------|-----------|------------------|-----------|
| Source Type | ESI      | Ion Polarity          | Positive  | Set Nebulizer    | 1.2 Bar   |
| Focus       | Active   | Set Capillary         | 4500 V    | Set Dry Heater   | 200 °C    |
| Scan Begin  | 50 m/z   | Set End Plate Offset  | -500 V    | Set Dry Gas      | 7.0 l/min |
| Scan End    | 3000 m/z | Set Collision Cell RF | 130.0 Vpp | Set Divert Valve | Waste     |

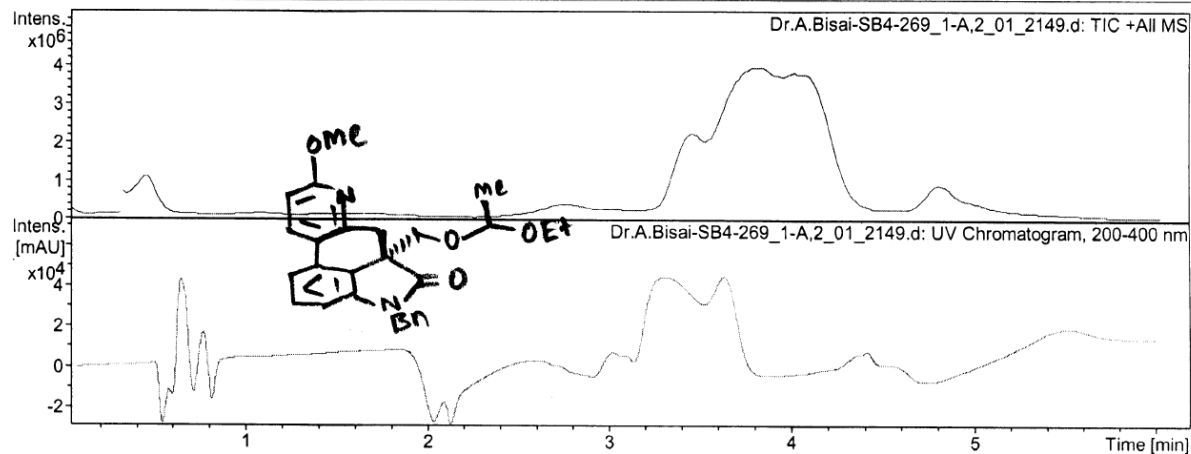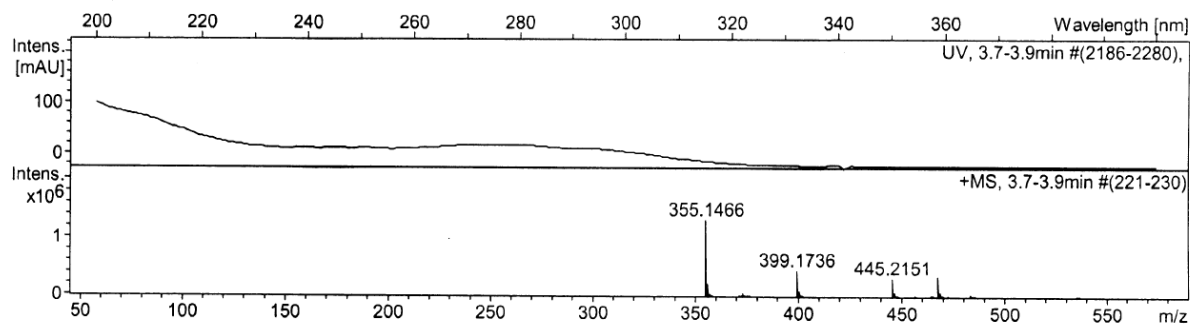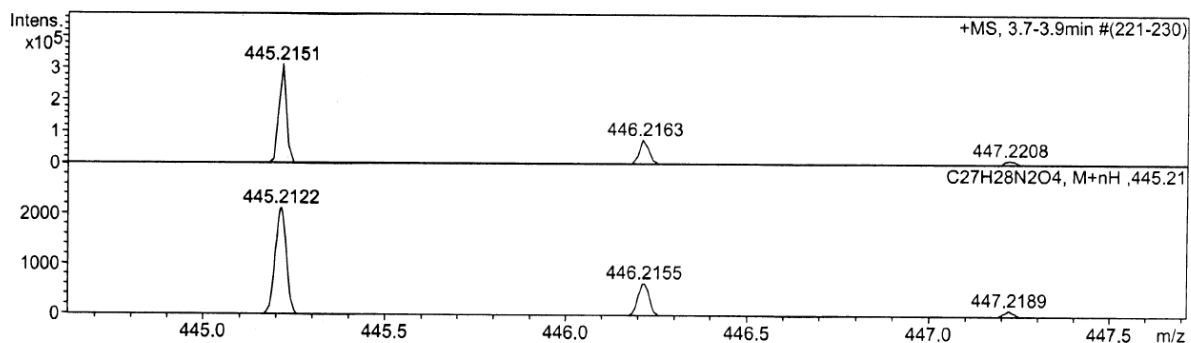

Scanned copy of mass spectrum of (15a)

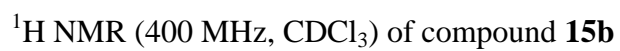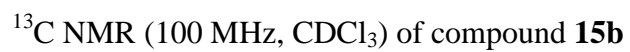

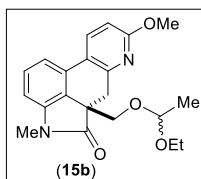

## Mass Spectrum SmartFormula Report

### Analysis Info

Acquisition Date 2/7/2018 5:49:08 AM

Sample Name 2016307-SB-07-14-NME  
Comment

Instrument / Ser# maXis 4G 21240

### Acquisition Parameter

|             |            |                       |           |                  |           |
|-------------|------------|-----------------------|-----------|------------------|-----------|
| Source Type | ESI        | Ion Polarity          | Positive  | Set Nebulizer    | 1.0 Bar   |
| Focus       | Not active | Set Capillary         | 4000 V    | Set Dry Heater   | 220 °C    |
| Scan Begin  | 50 m/z     | Set End Plate Offset  | -500 V    | Set Dry Gas      | 6.0 l/min |
| Scan End    | 1500 m/z   | Set Collision Cell RF | 600.0 Vpp | Set Divert Valve | Waste     |

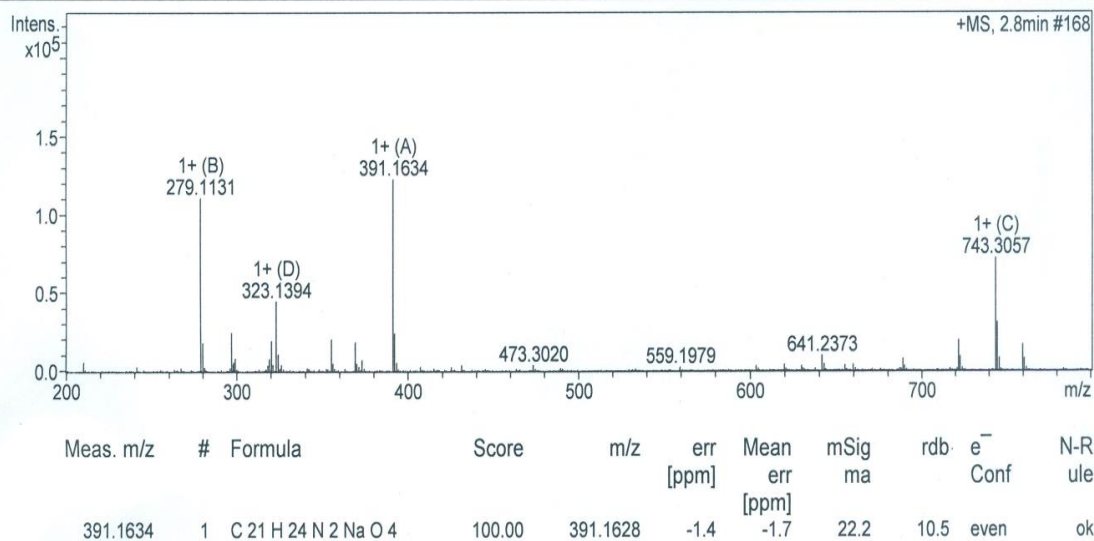

Mass spectrum of compound **15b**

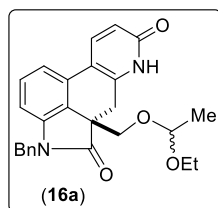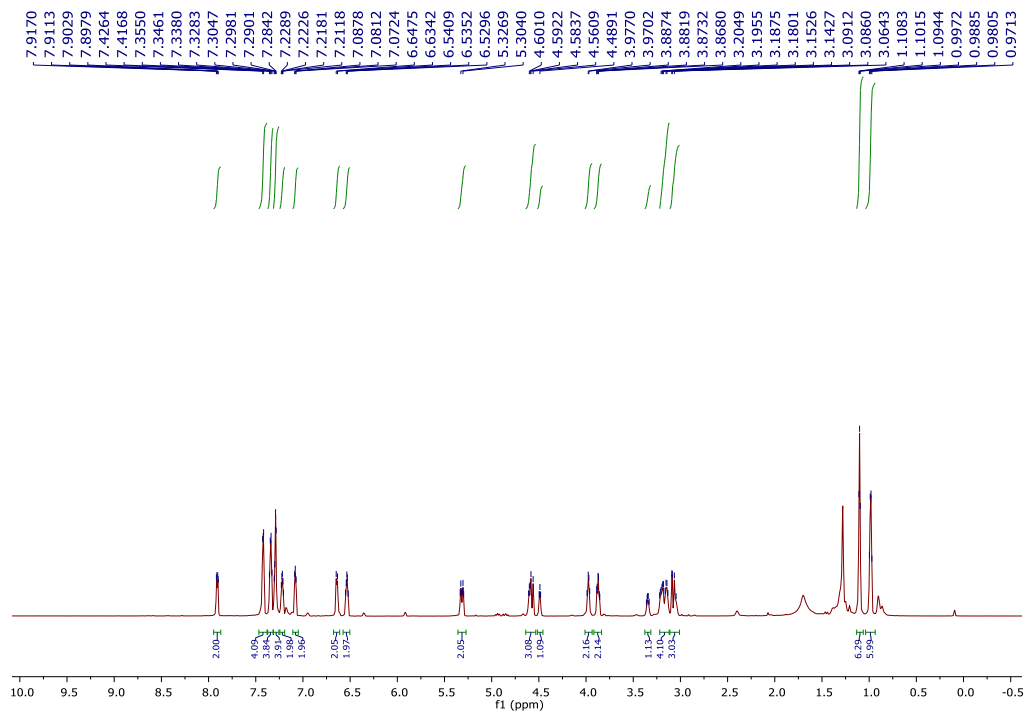

$^1\text{H}$  NMR (700 MHz,  $\text{CDCl}_3$ ) of **(16a)**

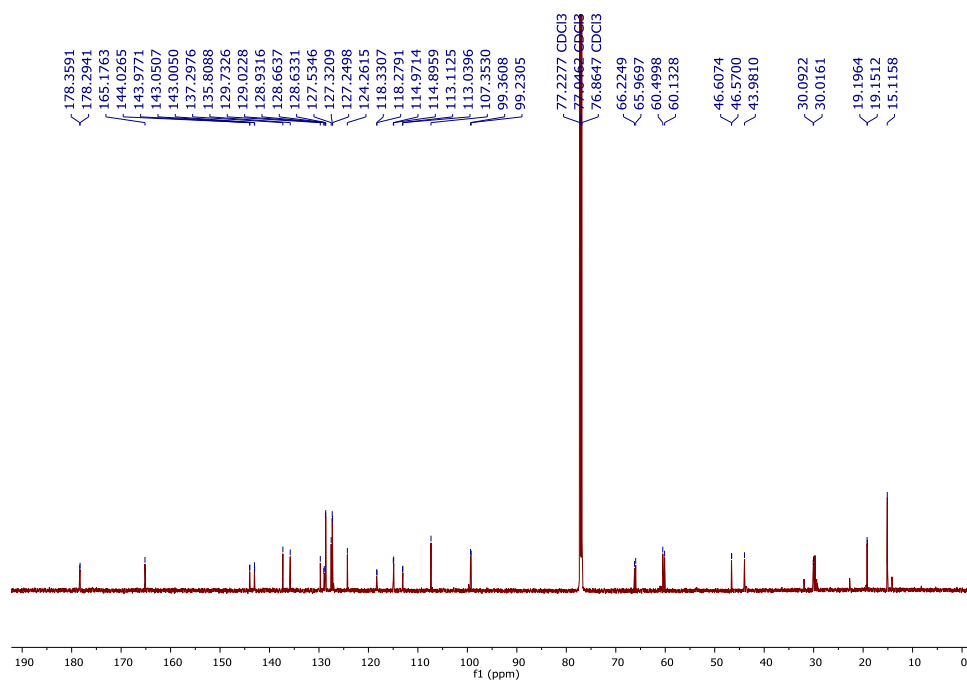

$^{13}\text{C}$  NMR (175 MHz,  $\text{CDCl}_3$ ) of **(16a)**

## Display Report

## Analysis Info

Analysis Name D:\Data\user data\2016\JAN-2016\06-JAN-2016\Dr.A.Bisai-SB7-177\_1-A,7\_01\_4873.d  
Method HRLCMS-20 Sept tune wide.m  
Sample Name Dr.A.Bisai-SB7-177  
Comment

Acquisition Date 1/6/2016 3:29:10 PM

Operator RUCHI

Instrument micrOTOF-Q II 10330

## Acquisition Parameter

|             |            |                       |           |                  |           |
|-------------|------------|-----------------------|-----------|------------------|-----------|
| Source Type | ESI        | Ion Polarity          | Positive  | Set Nebulizer    | 1.2 Bar   |
| Focus       | Not active | Set Capillary         | 4500 V    | Set Dry Heater   | 200 °C    |
| Scan Begin  | 50 m/z     | Set End Plate Offset  | -500 V    | Set Dry Gas      | 7.0 l/min |
| Scan End    | 3000 m/z   | Set Collision Cell RF | 600.0 Vpp | Set Divert Valve | Waste     |

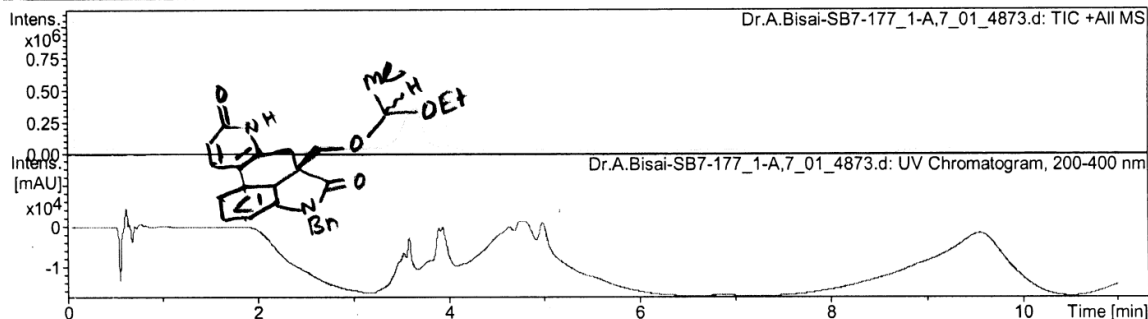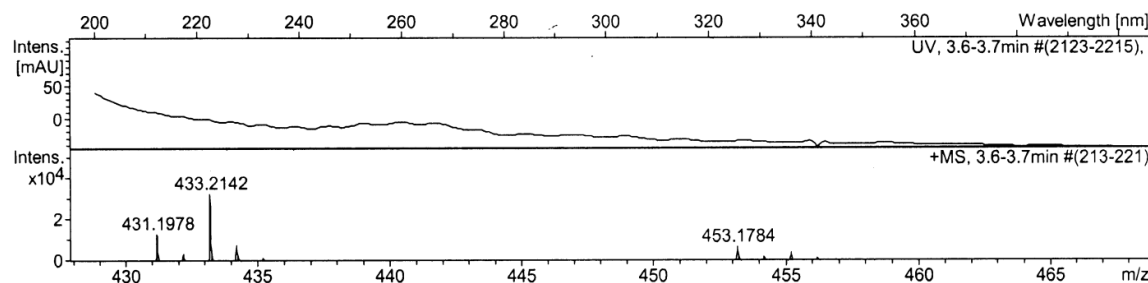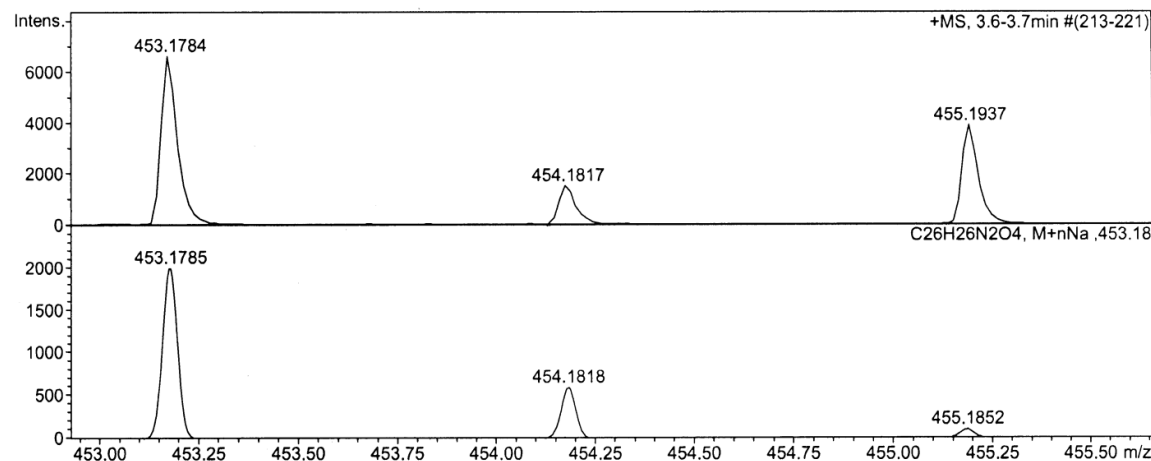

Scanned copy of mass spectrum of (16a)



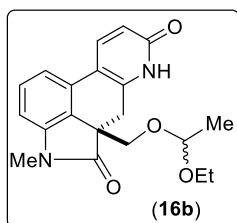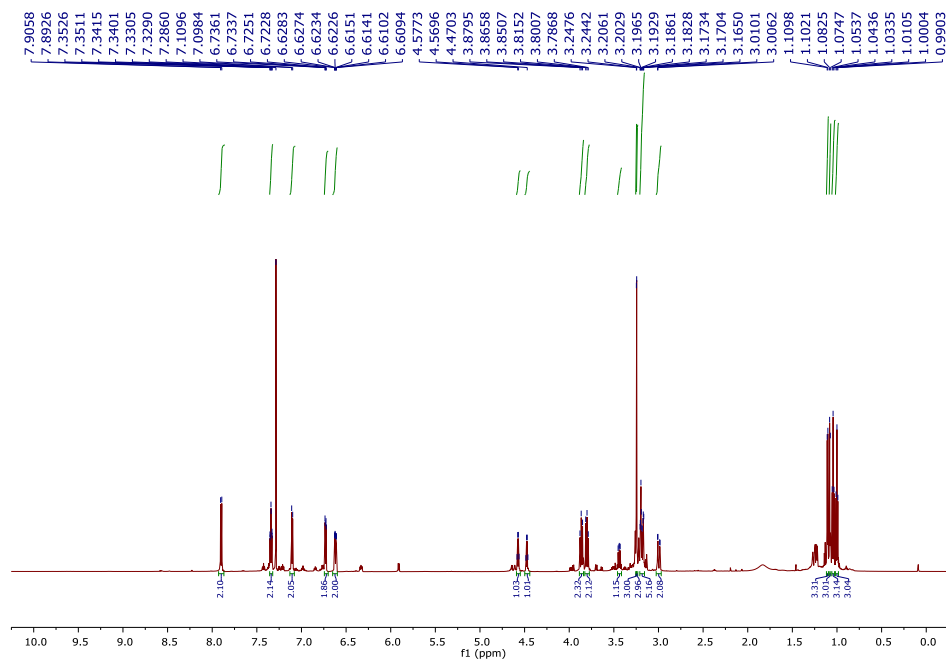 $^1\text{H}$  NMR (700 MHz,  $\text{CDCl}_3$ ) of **(16b)**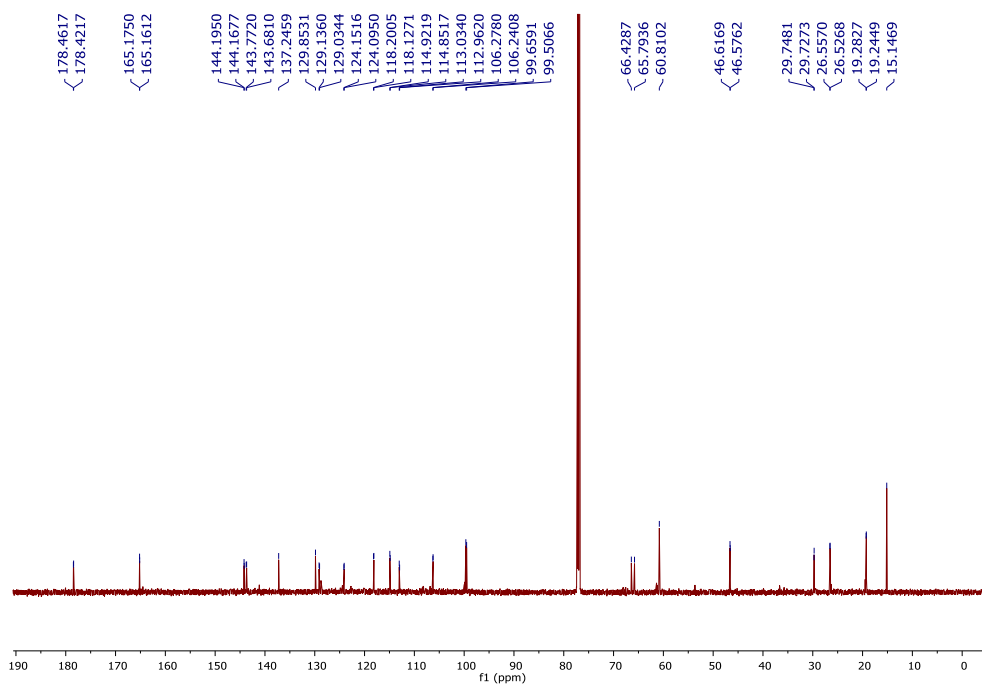 $^{13}\text{C}$  NMR (175 MHz,  $\text{CDCl}_3$ ) of **(16b)**

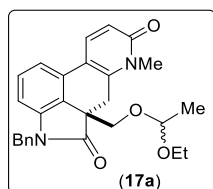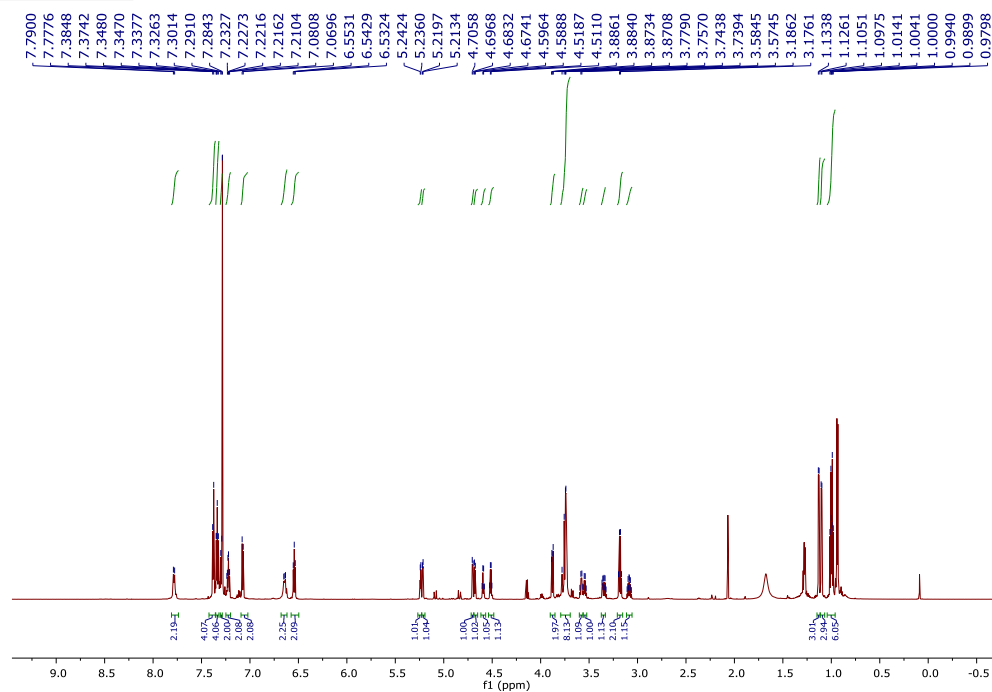

$^1\text{H}$  NMR (700 MHz,  $\text{CDCl}_3$ ) of **(17a)**

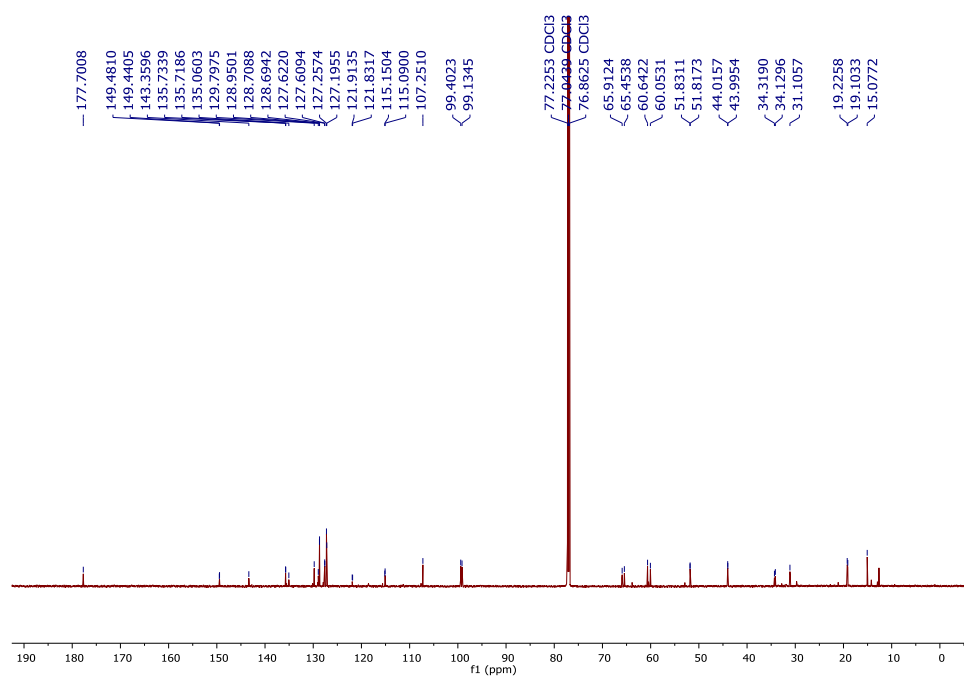

$^{13}\text{C}$  NMR (175 MHz,  $\text{CDCl}_3$ ) of **(17a)**

## Display Report

## Analysis Info

Analysis Name D:\Data\user data\2016\JAN-2016\06-JAN-2016\Dr.A.Bisai-SB7-178\_1-A,8\_01\_4874.d  
Method HRLCMS-20 Sept tune wide.m  
Sample Name Dr.A.Bisai-SB7-178  
Comment

Acquisition Date 1/6/2016 3:41:21 PM  
Operator RUCHI  
Instrument micrOTOF-Q II 10330

## Acquisition Parameter

|             |            |                       |           |                  |           |
|-------------|------------|-----------------------|-----------|------------------|-----------|
| Source Type | ESI        | Ion Polarity          | Positive  | Set Nebulizer    | 1.2 Bar   |
| Focus       | Not active | Set Capillary         | 4500 V    | Set Dry Heater   | 200 °C    |
| Scan Begin  | 50 m/z     | Set End Plate Offset  | -500 V    | Set Dry Gas      | 7.0 l/min |
| Scan End    | 3000 m/z   | Set Collision Cell RF | 600.0 Vpp | Set Divert Valve | Waste     |

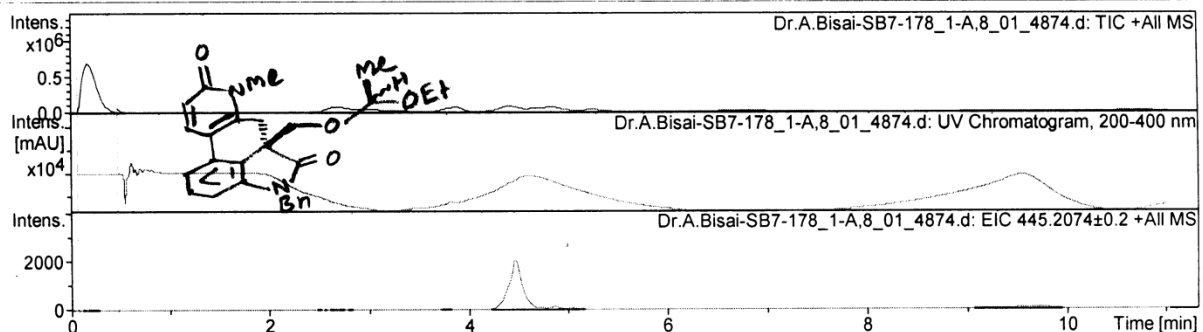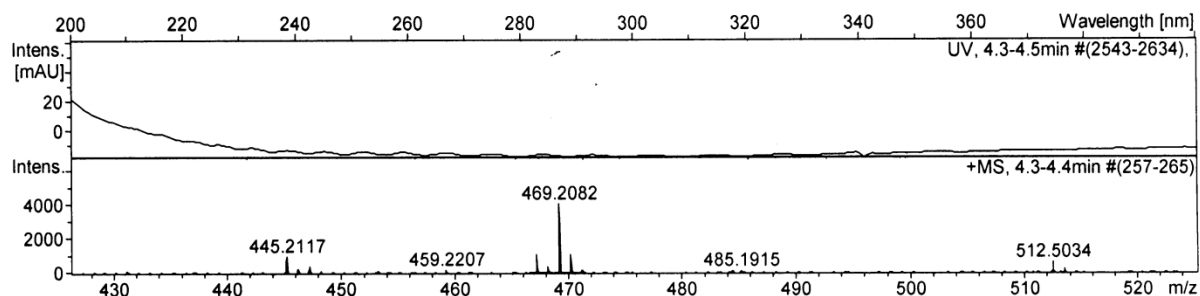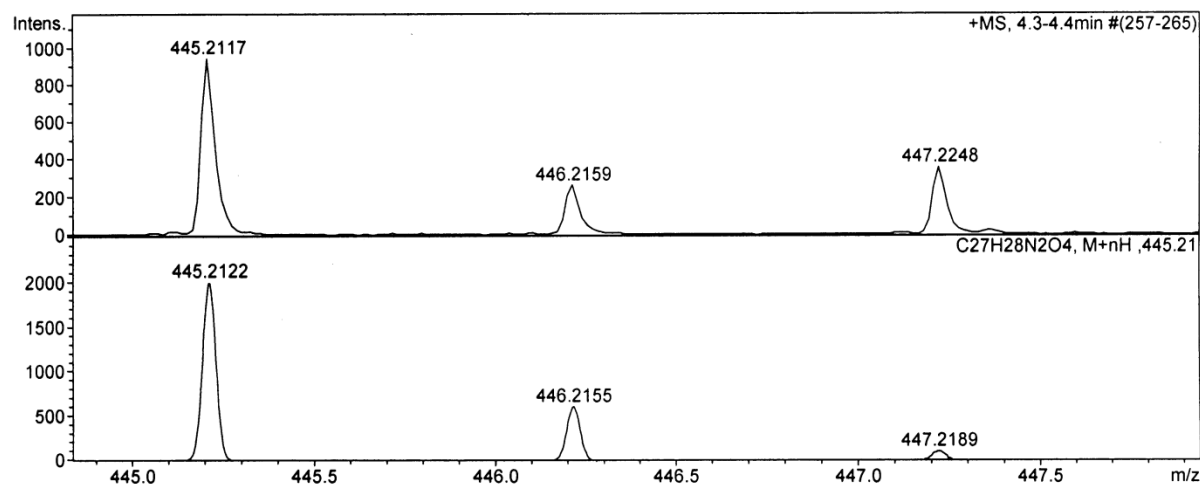

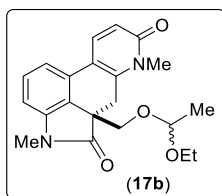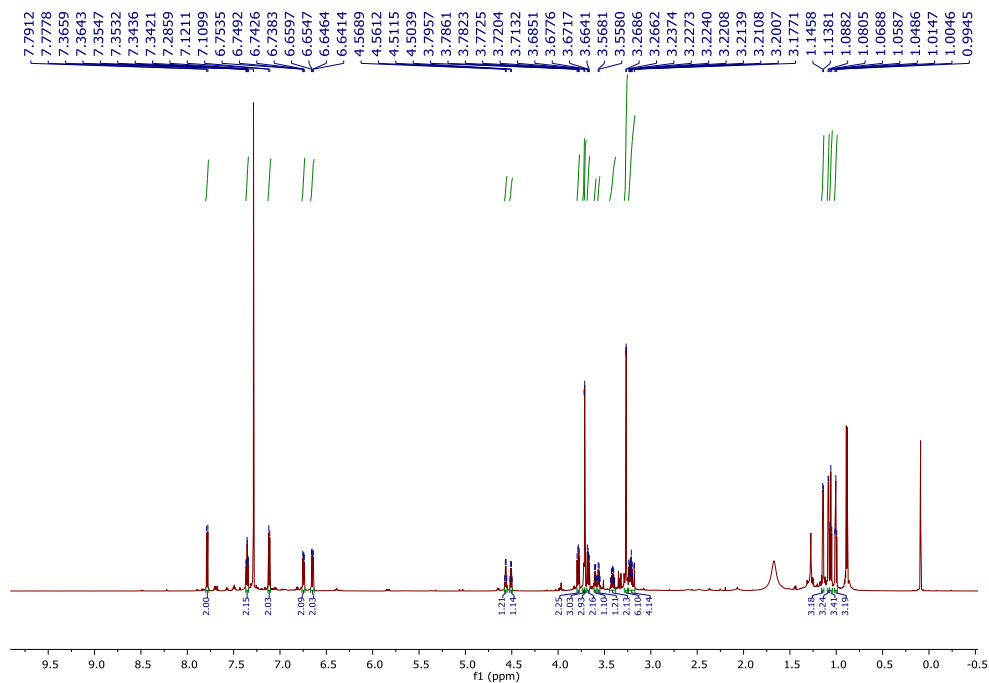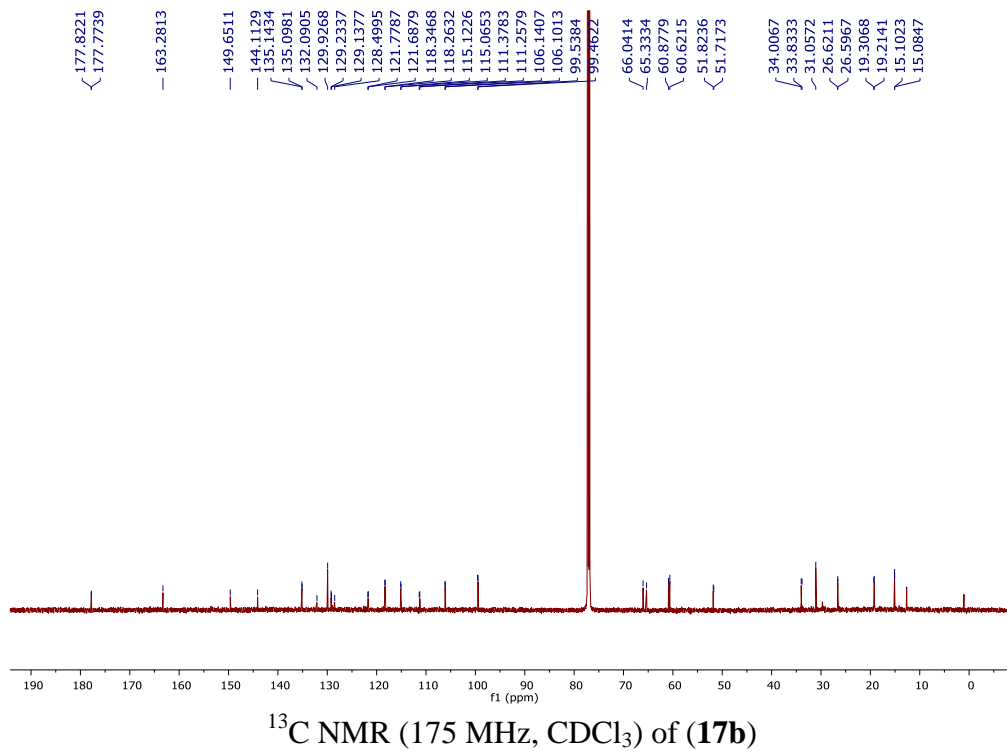

## Display Report

## Analysis Info

Analysis Name D:\Data\user data\2016\JAN-2016\21-JAN-2016\Dr.A.Bisai-SB7-183-VE.d  
Method tune\_low\_APCI.m  
Sample Name SB7-183-VE  
Comment

Acquisition Date 1/21/2016 3:31:19 PM  
Operator RUCHI  
Instrument micrOTOF-Q II 10330

## Acquisition Parameter

|             |            |                       |           |                  |           |
|-------------|------------|-----------------------|-----------|------------------|-----------|
| Source Type | APCI       | Ion Polarity          | Negative  | Set Nebulizer    | 2.5 Bar   |
| Focus       | Not active | Set Capillary         | 3500 V    | Set Dry Heater   | 200 °C    |
| Scan Begin  | 50 m/z     | Set End Plate Offset  | -500 V    | Set Dry Gas      | 4.0 l/min |
| Scan End    | 3000 m/z   | Set Collision Cell RF | 130.0 Vpp | Set Divert Valve | Waste     |

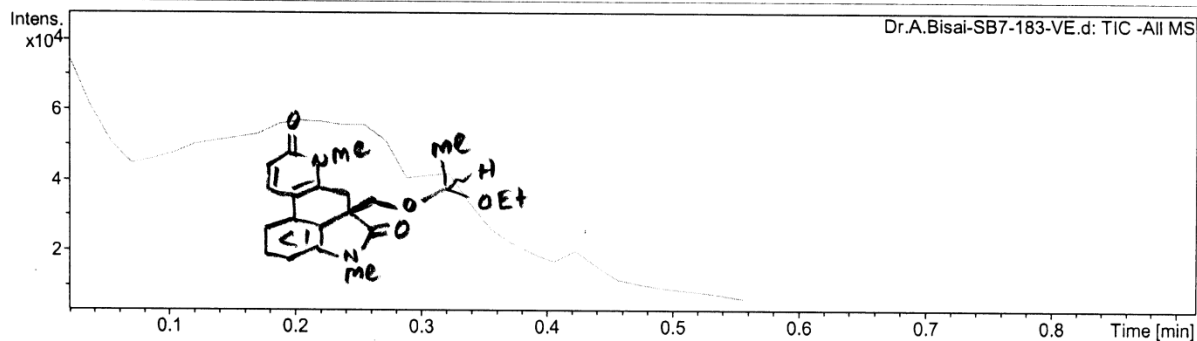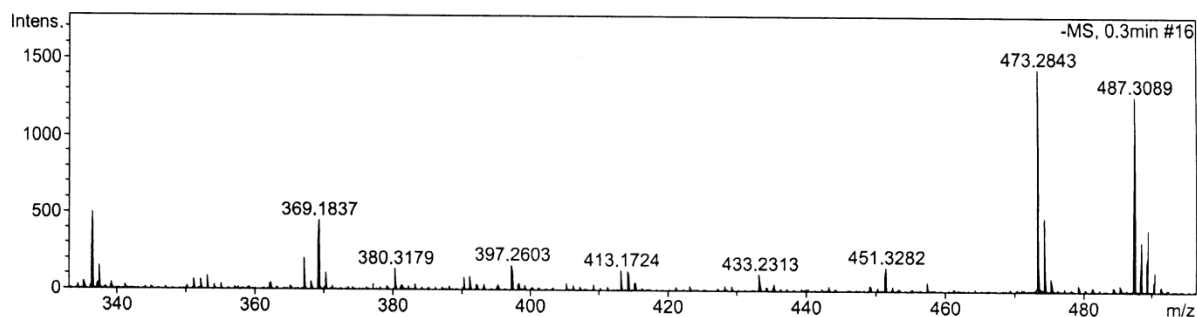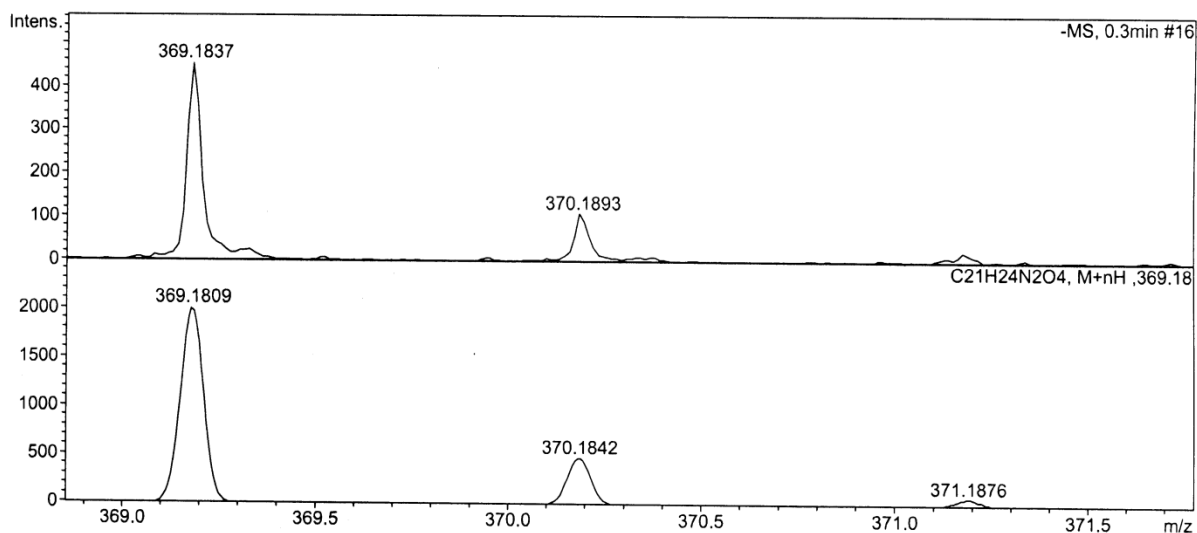

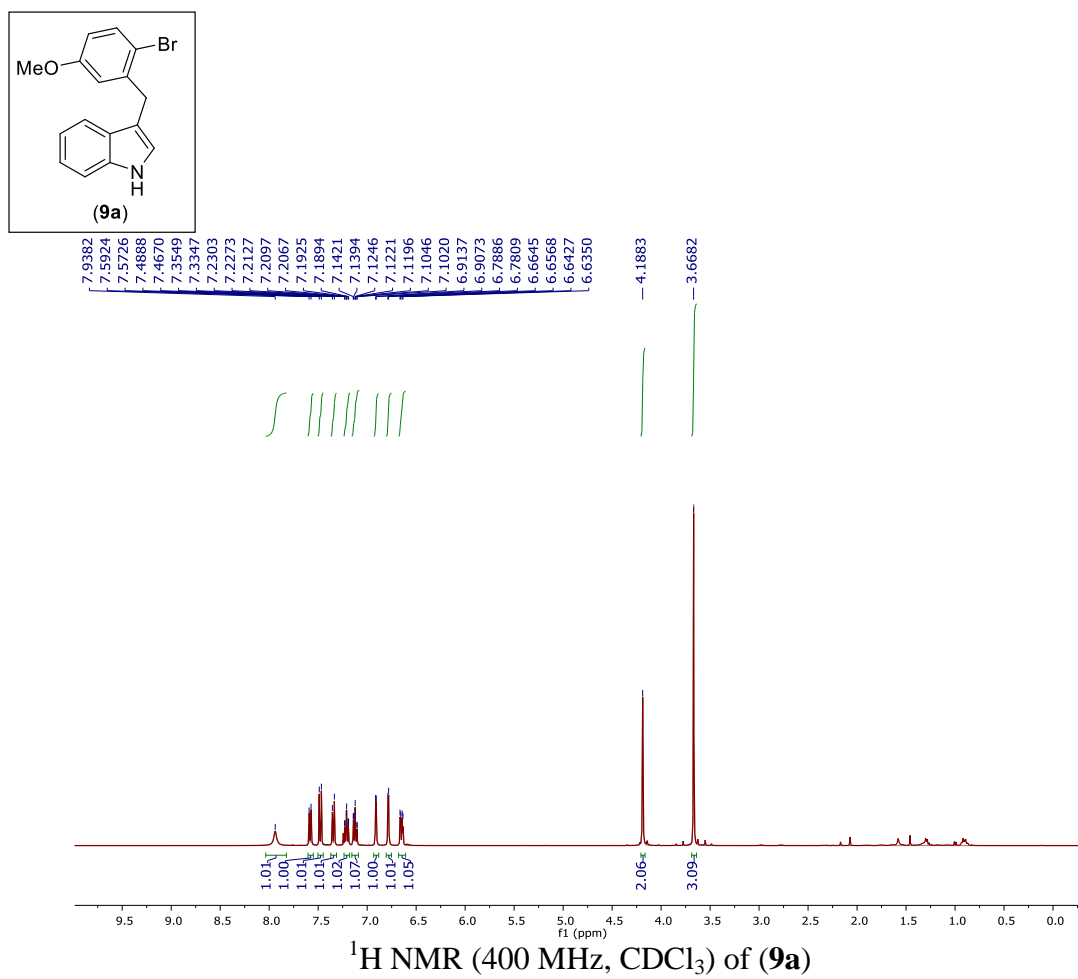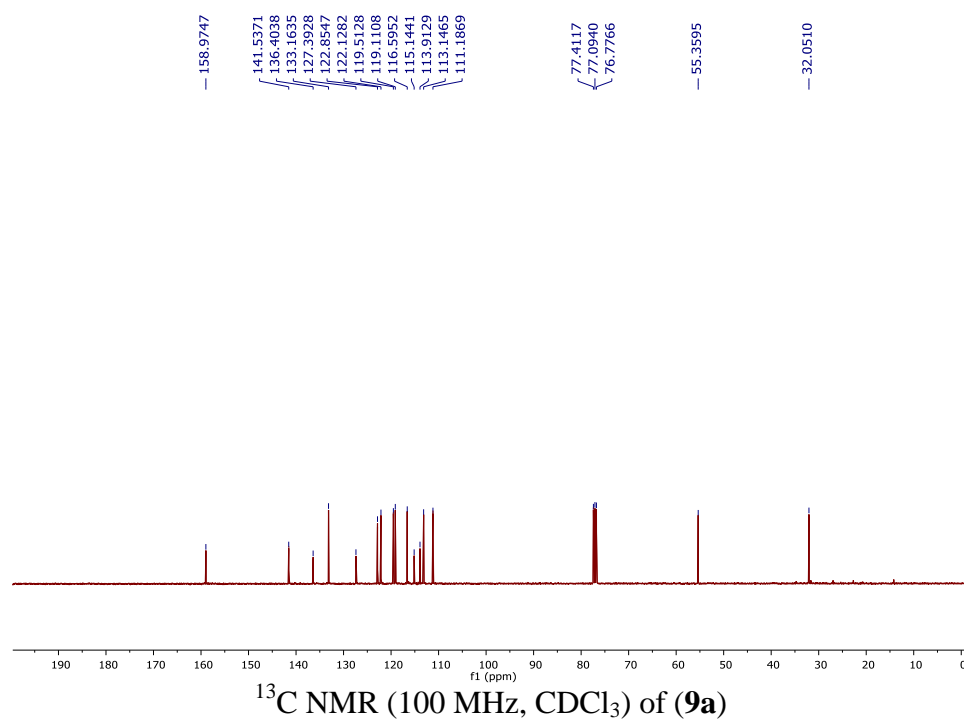

## Display Report

## Analysis Info

Analysis Name D:\Data\user data\2016\April 2016\12-04-2016\Dr.A.Bisai-SB4-131\_1-D,3\_01\_5856.d  
Method HRLCMS-20 Sept.m  
Sample Name Dr.A.Bisai-SB4-131  
Comment

Acquisition Date 4/12/2016 4:10:25 PM

Operator DIMPLE

Instrument micrOTOF-Q II 10330

## Acquisition Parameter

Source Type ESI  
Focus Active  
Scan Begin 50 m/z  
Scan End 3000 m/z

Ion Polarity Positive  
Set Capillary 4500 V  
Set End Plate Offset -500 V  
Set Collision Cell RF 130.0 Vpp

Set Nebulizer 1.2 Bar  
Set Dry Heater 200 °C  
Set Dry Gas 7.0 l/min  
Set Divert Valve Waste

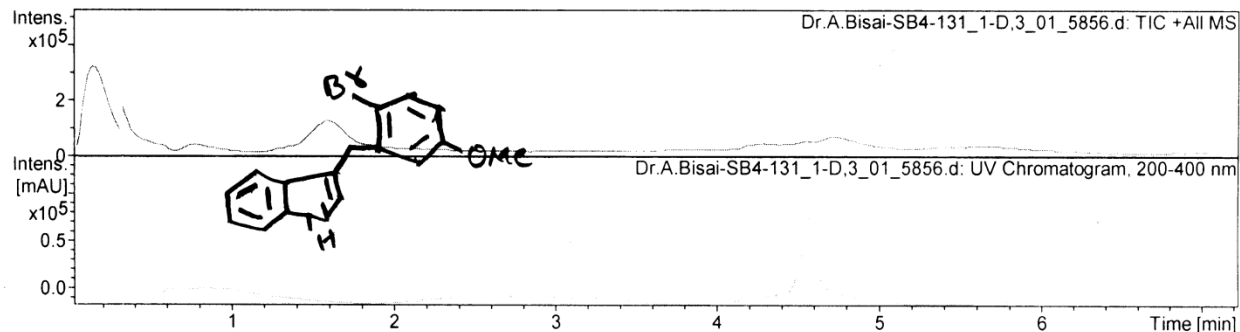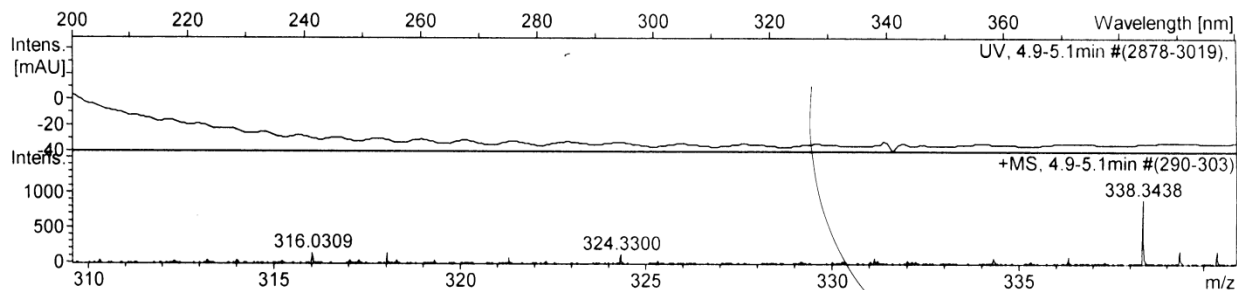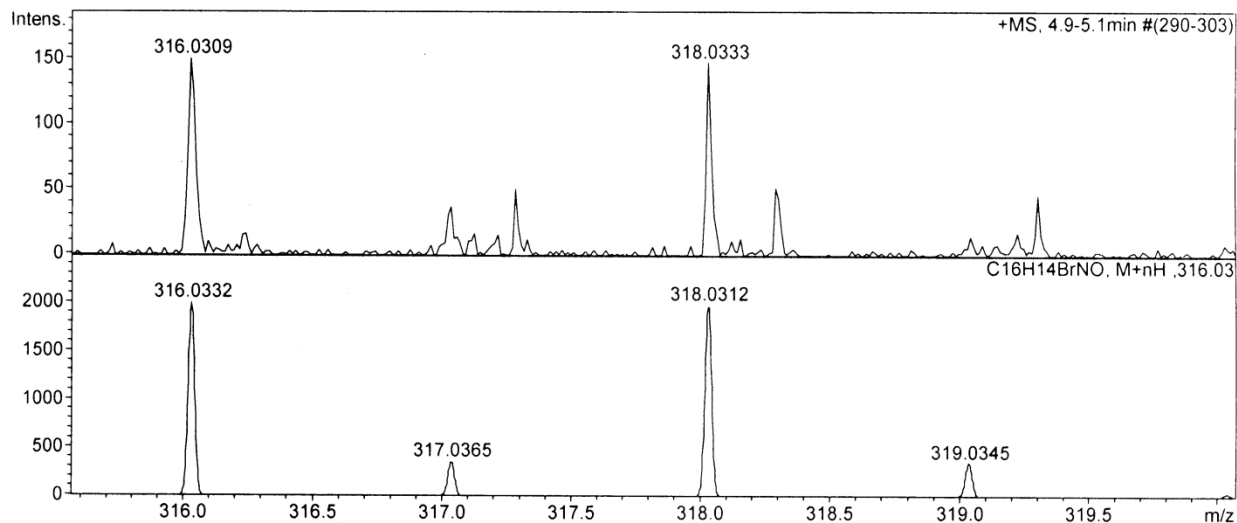

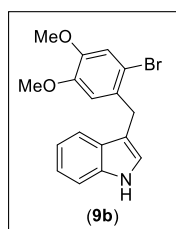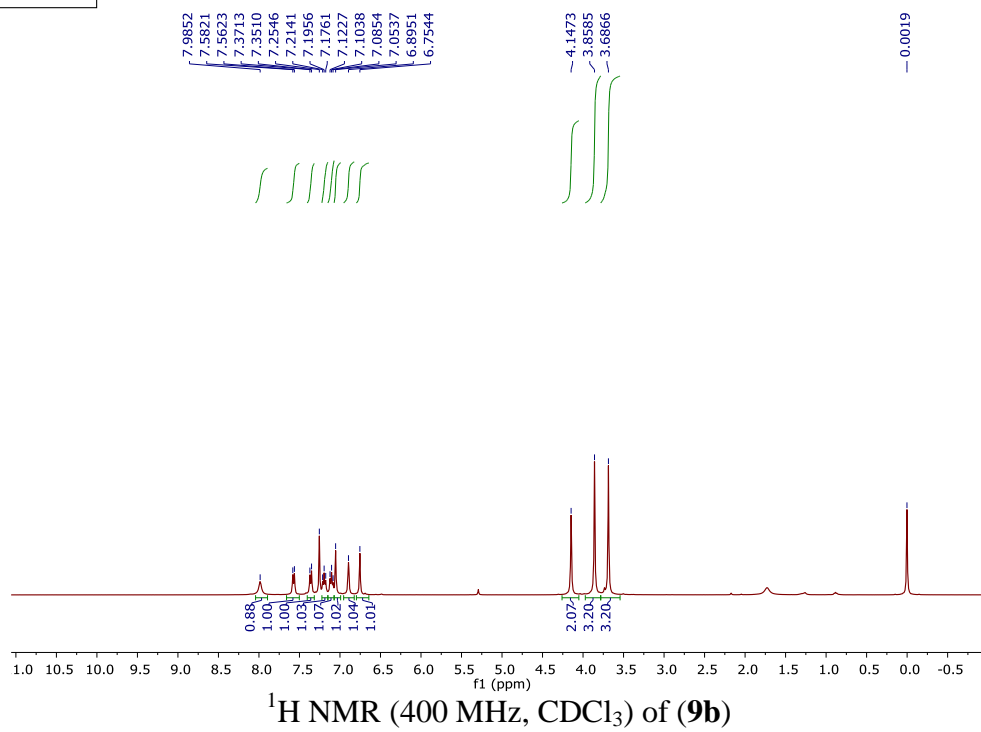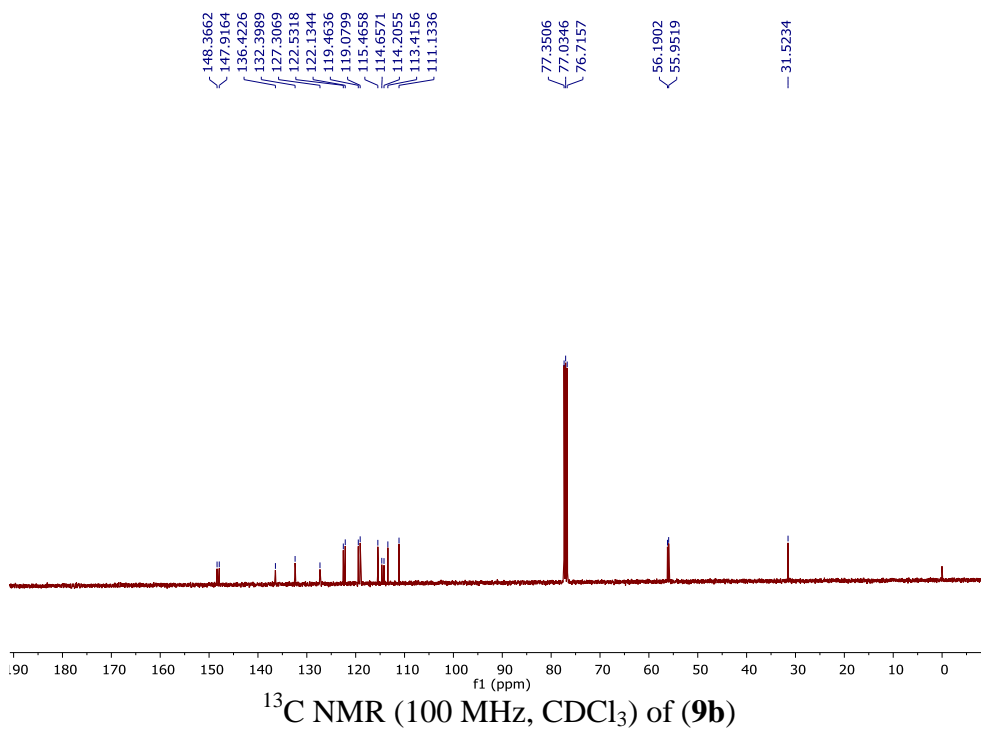



## Display Report

## Analysis Info

|               |                                                                                 |                  |                        |
|---------------|---------------------------------------------------------------------------------|------------------|------------------------|
| Analysis Name | D:\Data\NEW USER DATA 2017\NOV\21 nov\Dr.A.Bisai-AB-KNB-04-328-B_1-A,6_01_353.d | Acquisition Date | 11/21/2017 10:44:49 AM |
| Method        | hrlcms-20 sept.m                                                                | Operator         | RUCHI                  |
| Sample Name   | Dr.A.Bisai-AB-KNB-04-328-B                                                      | Instrument       | micrOTOF-Q II 10330    |
| Comment       |                                                                                 |                  |                        |

## Acquisition Parameter

|             |          |                       |           |                  |           |
|-------------|----------|-----------------------|-----------|------------------|-----------|
| Source Type | ESI      | Ion Polarity          | Positive  | Set Nebulizer    | 1.2 Bar   |
| Focus       | Active   | Set Capillary         | 4500 V    | Set Dry Heater   | 200 °C    |
| Scan Begin  | 50 m/z   | Set End Plate Offset  | -500 V    | Set Dry Gas      | 7.0 l/min |
| Scan End    | 3000 m/z | Set Collision Cell RF | 130.0 Vpp | Set Divert Valve | Waste     |

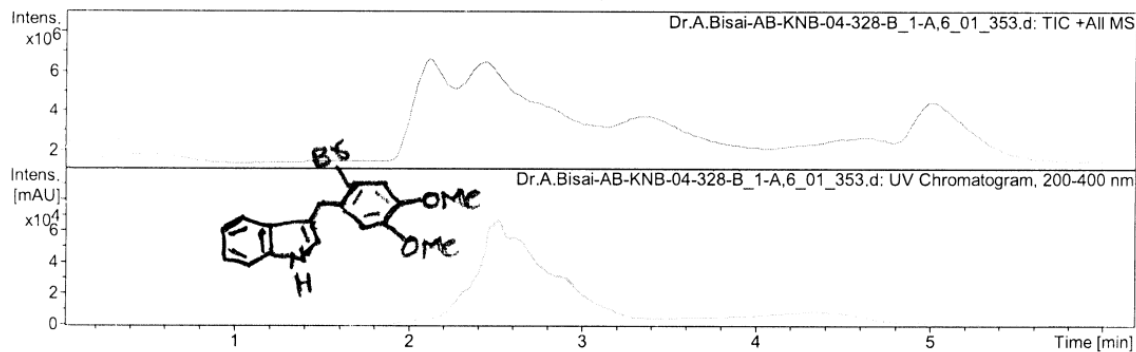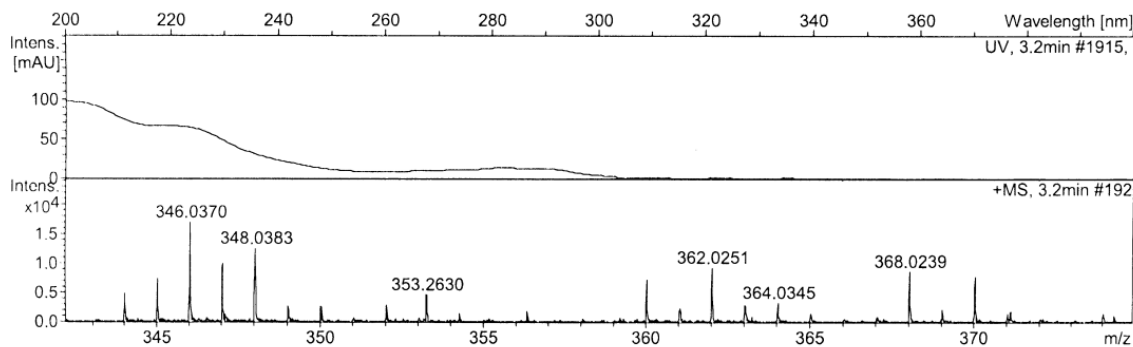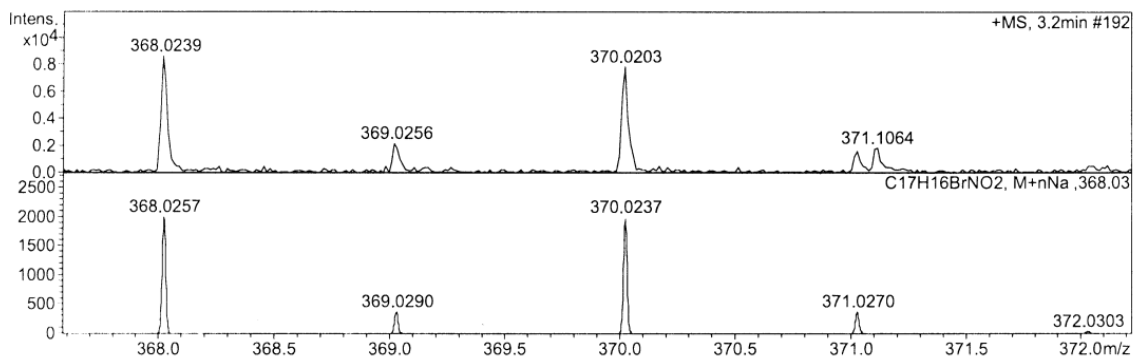

Scanned copy of mass spectrum of (9b)

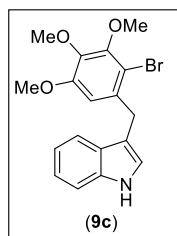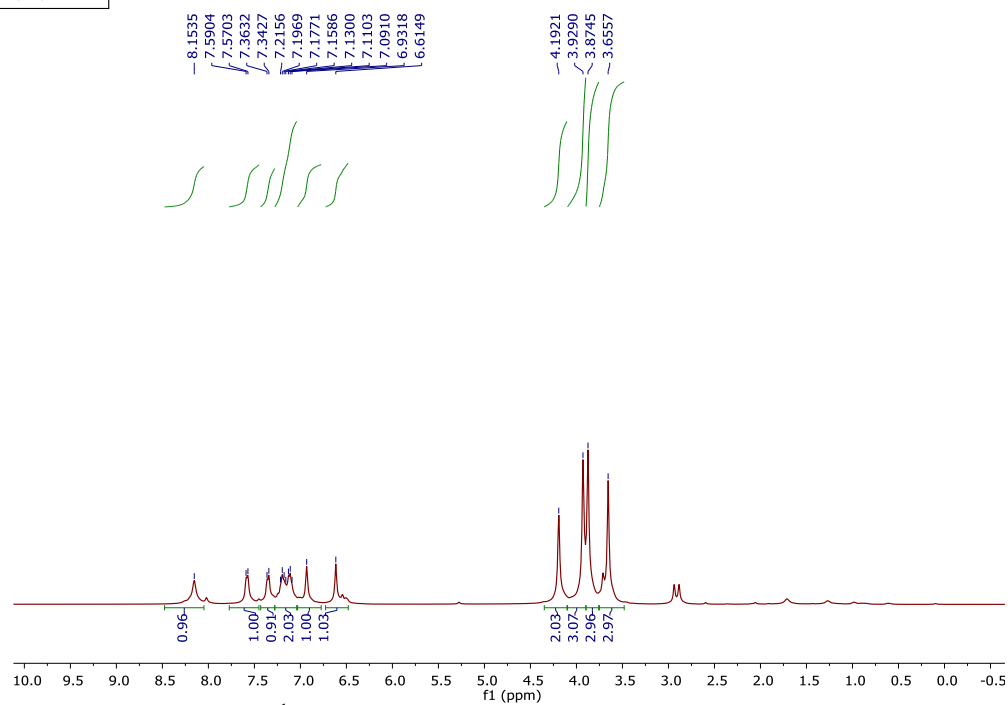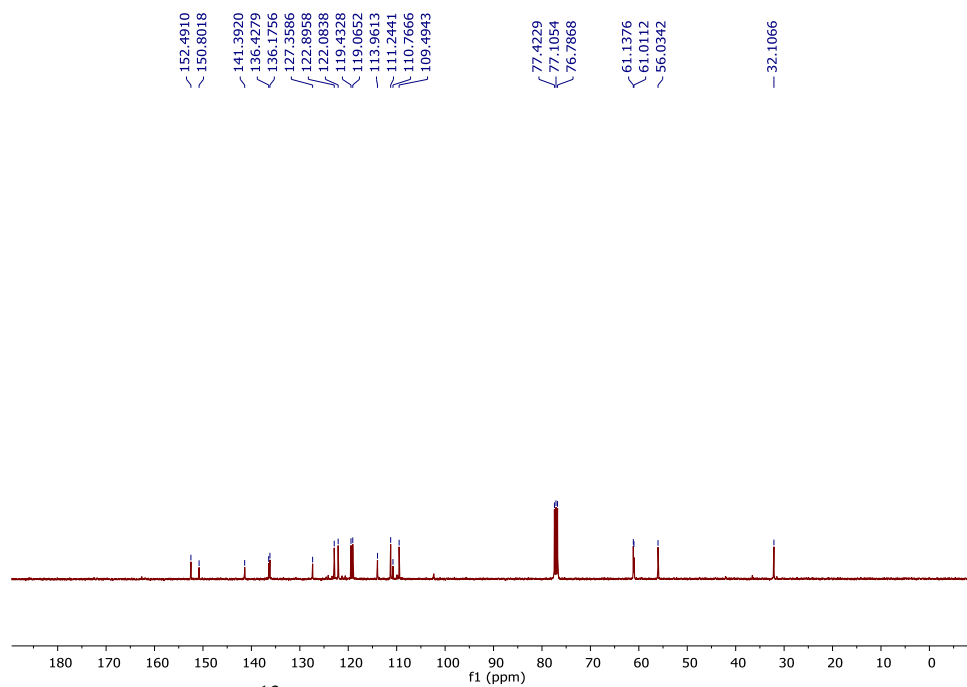

## Display Report

## Analysis Info

Analysis Name D:\Data\user data\2016\April 2016\12-04-2016\Dr.A.Bisai-SB4-130\_1-D.2\_01\_5853.d  
Method HRLCMS-20 Sept.m  
Sample Name Dr.A.Bisai-SB4-130  
Comment

Acquisition Date 4/12/2016 3:45:47 PM  
Operator DIMPLE  
Instrument micrOTOF-Q II 10330

## Acquisition Parameter

|             |          |                       |           |                  |           |
|-------------|----------|-----------------------|-----------|------------------|-----------|
| Source Type | ESI      | Ion Polarity          | Positive  | Set Nebulizer    | 1.2 Bar   |
| Focus       | Active   | Set Capillary         | 4500 V    | Set Dry Heater   | 200 °C    |
| Scan Begin  | 50 m/z   | Set End Plate Offset  | -500 V    | Set Dry Gas      | 7.0 l/min |
| Scan End    | 3000 m/z | Set Collision Cell RF | 130.0 Vpp | Set Divert Valve | Waste     |

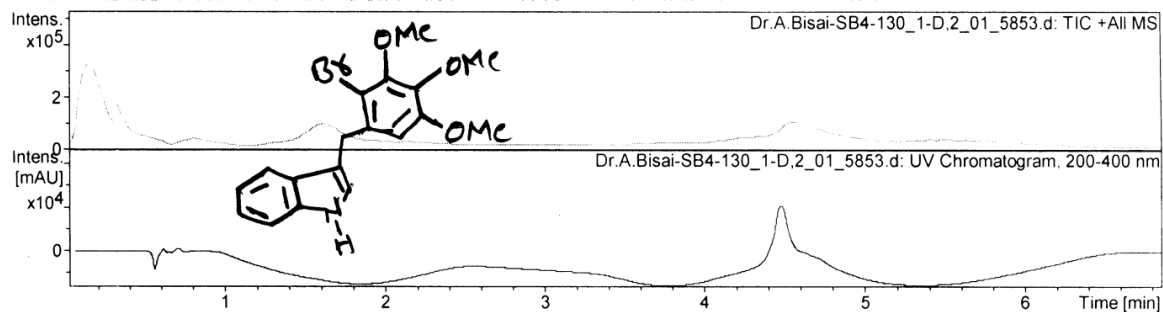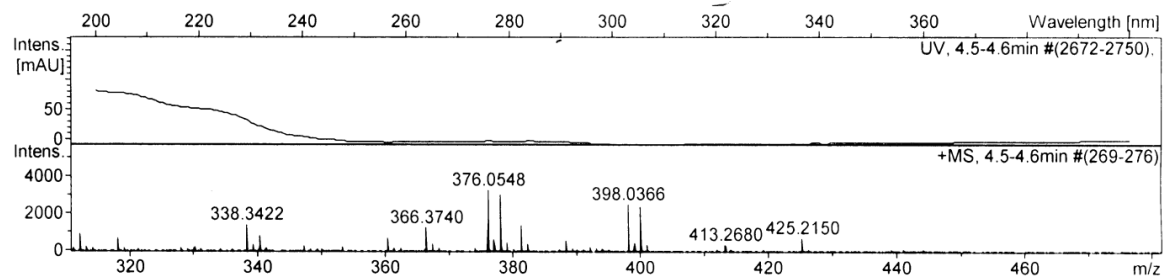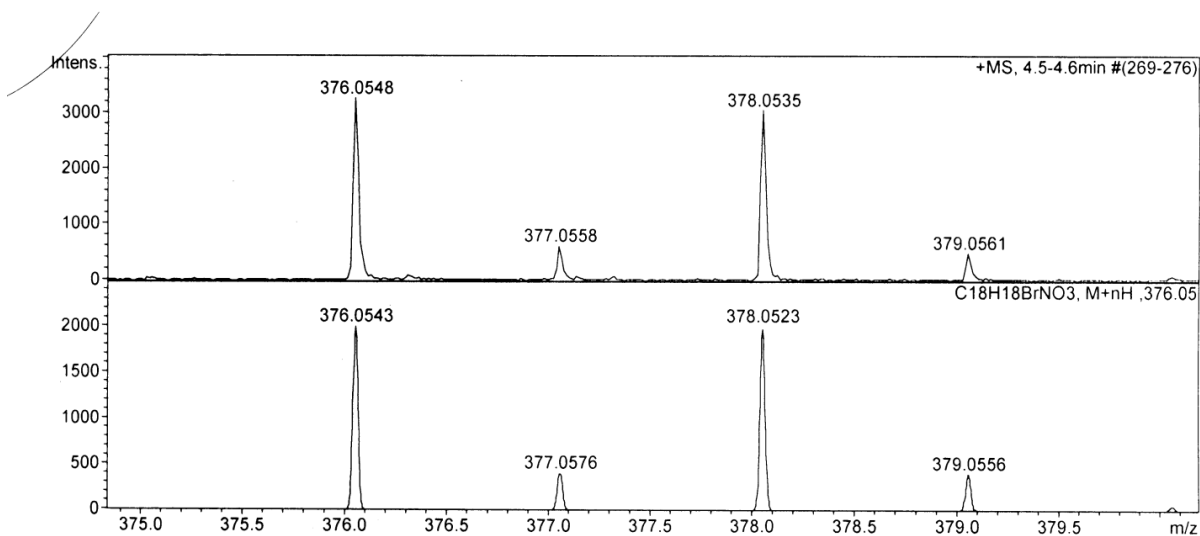

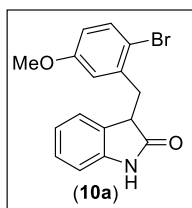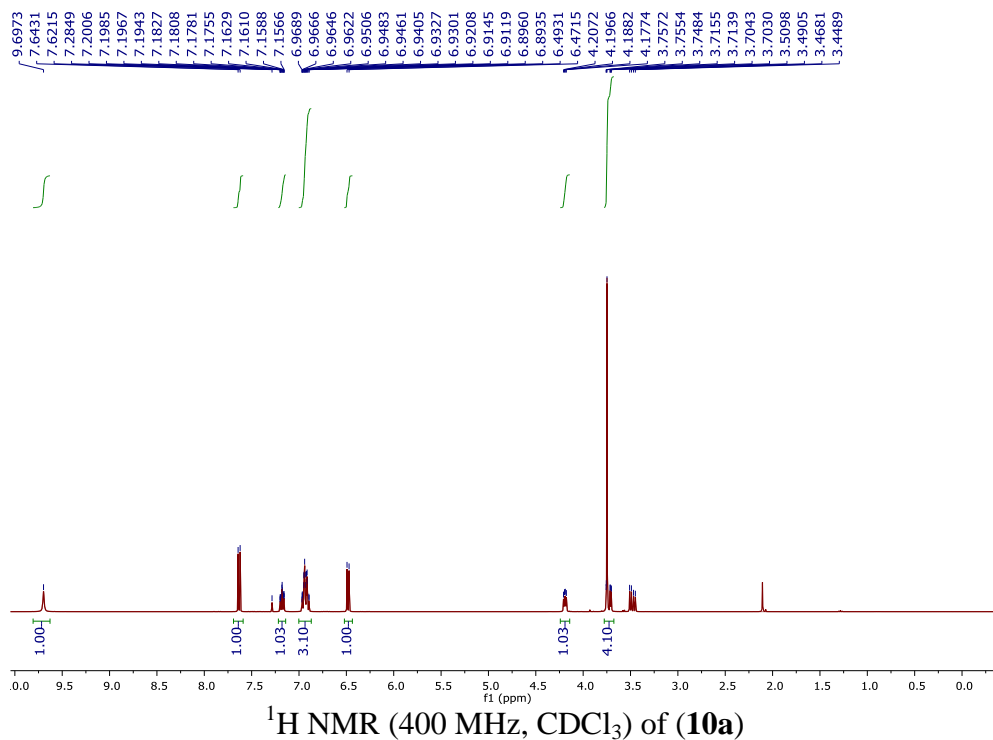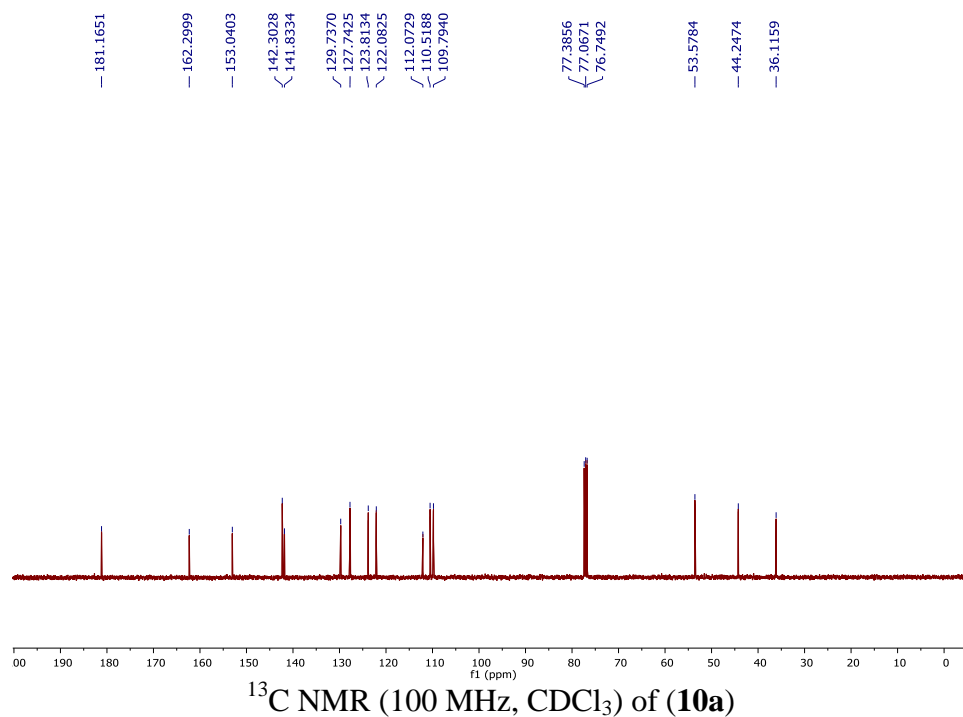

## Display Report

## Analysis Info

Analysis Name D:\Data\user data\2016\April 2016\12-04-2016\Dr.A. Bisai-SB4-137\_1-C,7\_01\_5849.d  
 Method HRLCMS-20 Sept.m  
 Sample Name Dr.A.Bisai-SB4-137  
 Comment

Acquisition Date 4/12/2016 3:13:07 PM  
 Operator DIMPLE  
 Instrument micrOTOF-Q II 10330

## Acquisition Parameter

|             |          |                       |           |                  |           |
|-------------|----------|-----------------------|-----------|------------------|-----------|
| Source Type | ESI      | Ion Polarity          | Positive  | Set Nebulizer    | 1.2 Bar   |
| Focus       | Active   | Set Capillary         | 4500 V    | Set Dry Heater   | 200 °C    |
| Scan Begin  | 50 m/z   | Set End Plate Offset  | -500 V    | Set Dry Gas      | 7.0 l/min |
| Scan End    | 3000 m/z | Set Collision Cell RF | 130.0 Vpp | Set Divert Valve | Waste     |

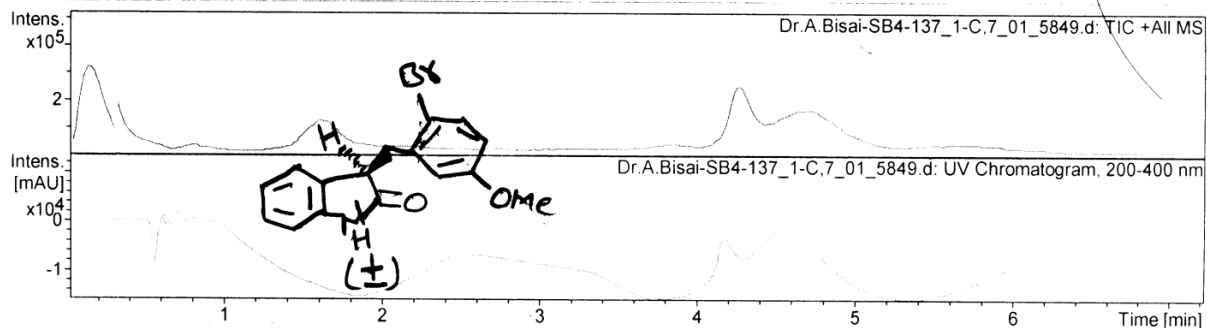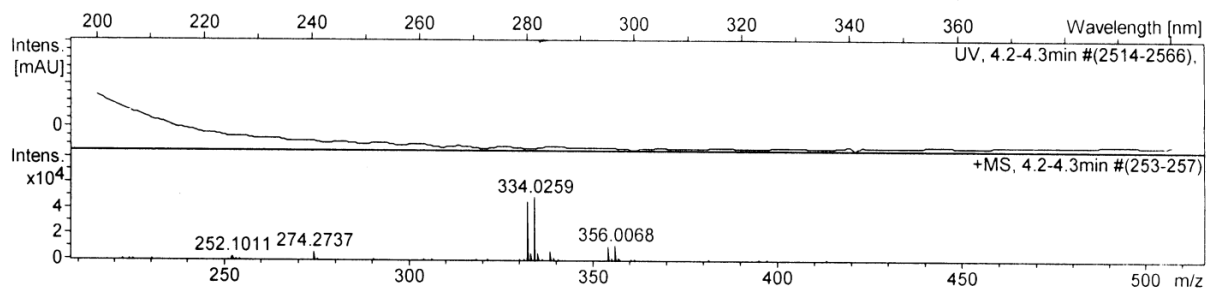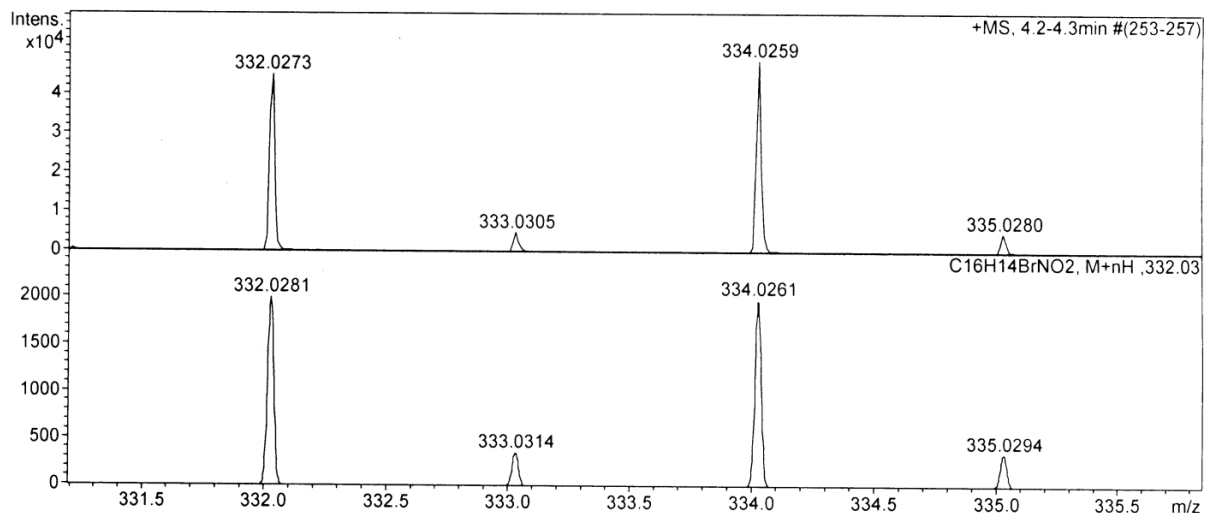

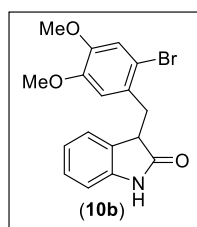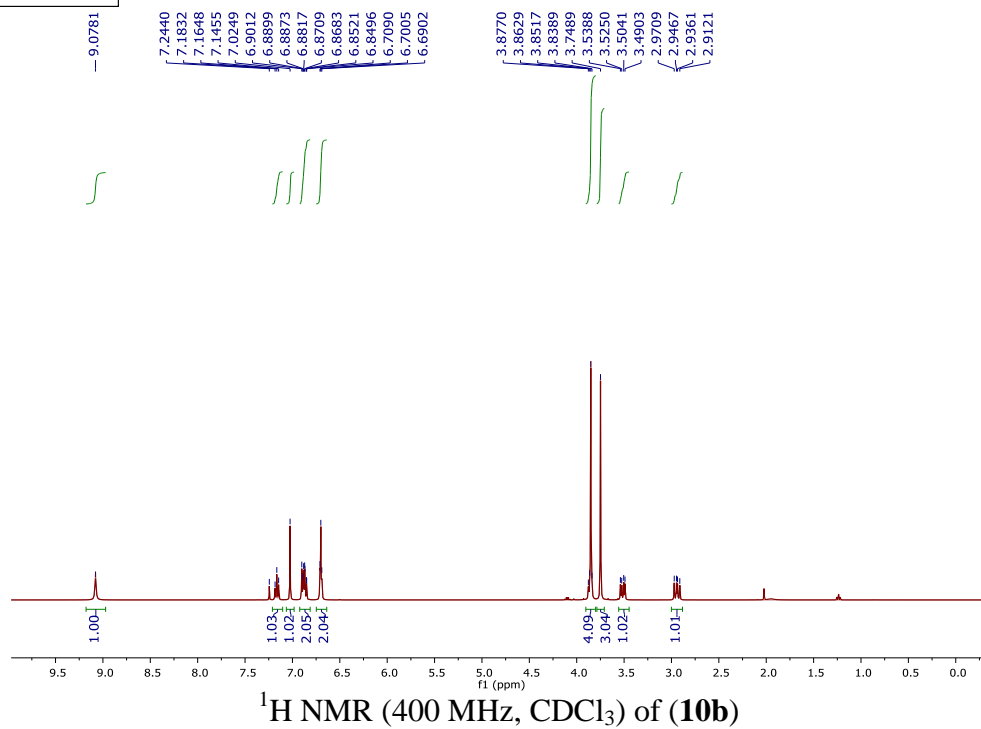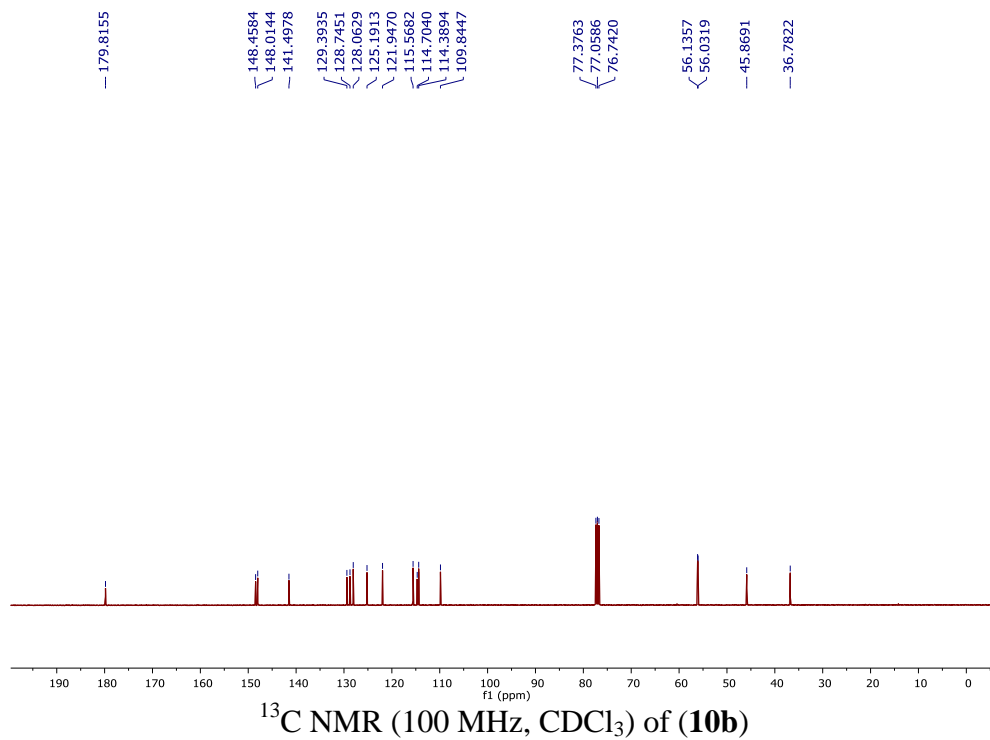

## Display Report

## Analysis Info

|               |                                                                                 |                  |                        |
|---------------|---------------------------------------------------------------------------------|------------------|------------------------|
| Analysis Name | D:\Data\NEW USER DATA 2017\NOV\21 nov\Dr.A.Bisai-AB-KNB-04-328-A_1-A,5_01_352.d | Acquisition Date | 11/21/2017 10:37:39 AM |
| Method        | hrlcms-20 sept.m                                                                | Operator         | RUCHI                  |
| Sample Name   | Dr.A.Bisai-AB-KNB-04-328-A                                                      | Instrument       | micrOTOF-Q II 10330    |
| Comment       |                                                                                 |                  |                        |

## Acquisition Parameter

|             |          |                       |           |                  |           |
|-------------|----------|-----------------------|-----------|------------------|-----------|
| Source Type | ESI      | Ion Polarity          | Positive  | Set Nebulizer    | 1.2 Bar   |
| Focus       | Active   | Set Capillary         | 4500 V    | Set Dry Heater   | 200 °C    |
| Scan Begin  | 50 m/z   | Set End Plate Offset  | -500 V    | Set Dry Gas      | 7.0 l/min |
| Scan End    | 3000 m/z | Set Collision Cell RF | 130.0 Vpp | Set Divert Valve | Waste     |

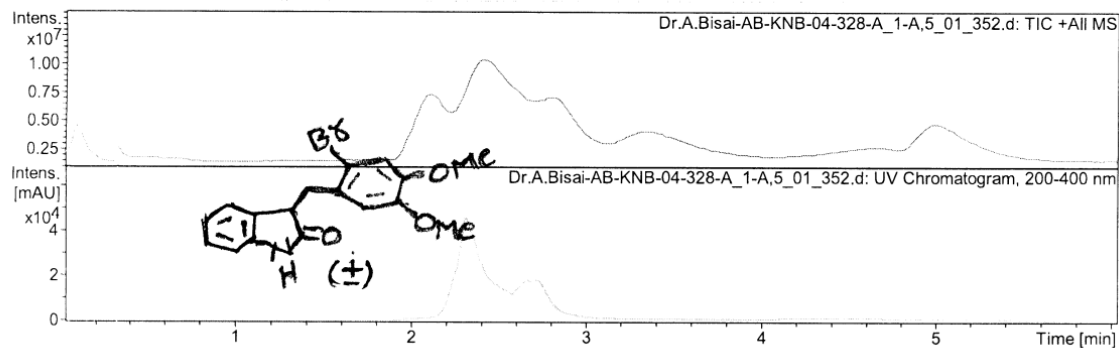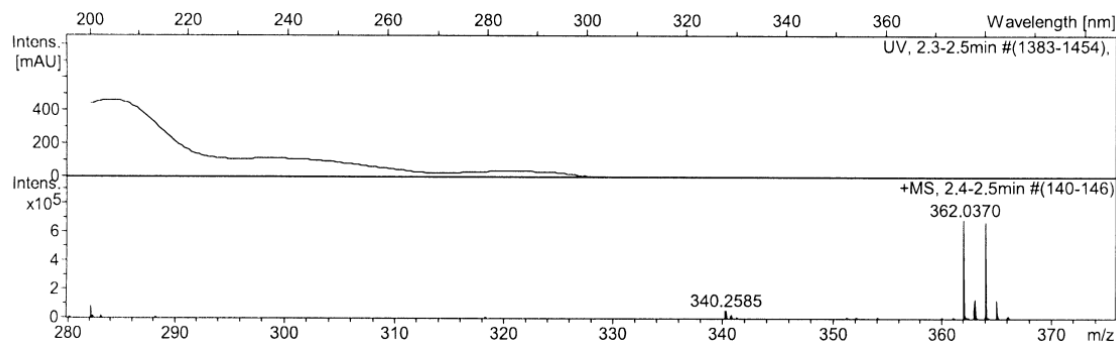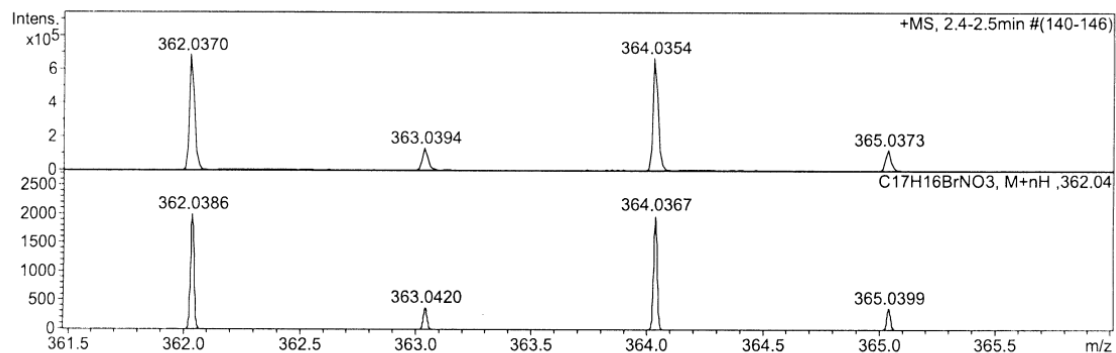

Scanned copy of mass spectrum of (10b)

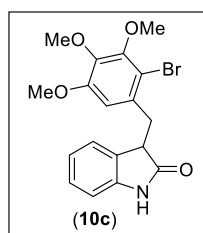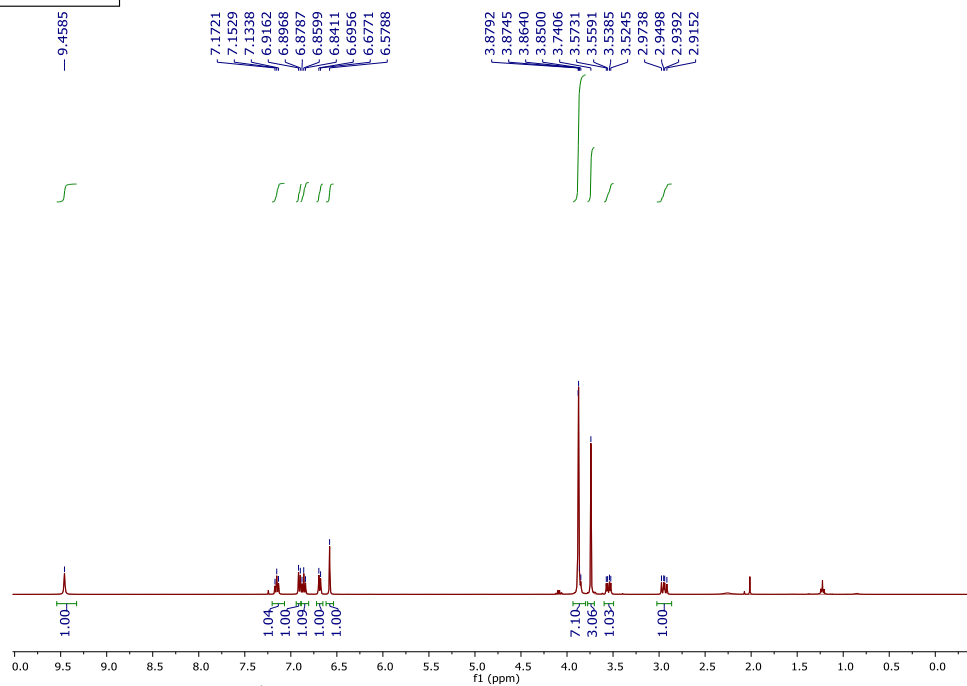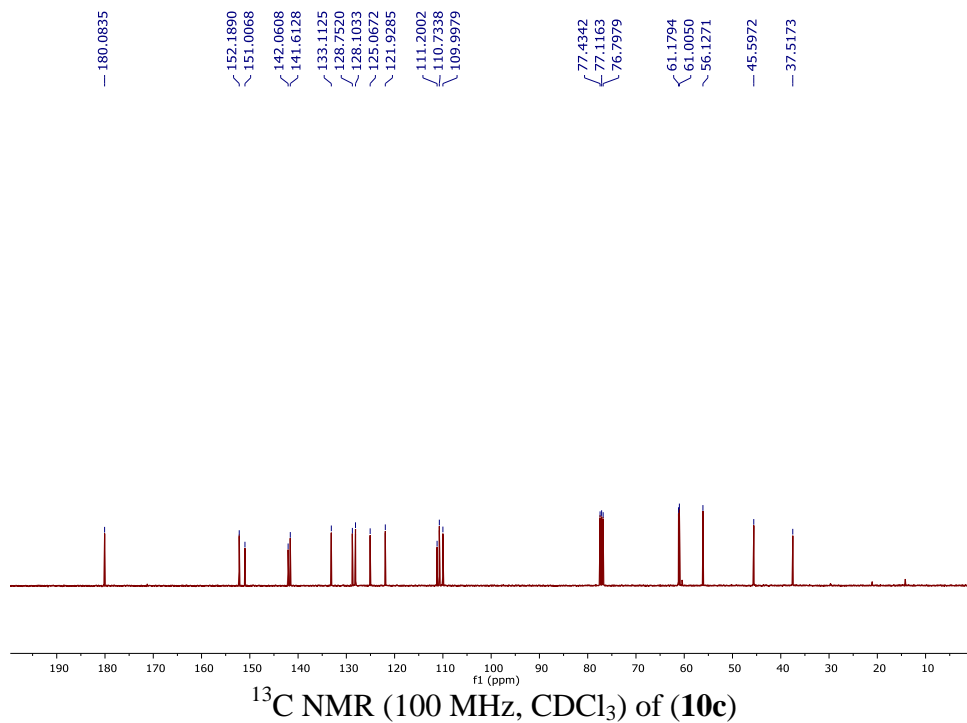



## Display Report

## Analysis Info

Analysis Name D:\Data\user data\2016\April 2016\12-04-2016\Dr.A.Bisai-SB4-135\_1-C,8\_01\_5850.d  
 Method HRLCMS-20 Sept.m  
 Sample Name Dr.A.Bisai-SB4-135  
 Comment

Acquisition Date 4/12/2016 3:21:16 PM  
 Operator DIMPLe  
 Instrument micrOTOF-Q II 10330

## Acquisition Parameter

|             |          |                       |           |                  |           |
|-------------|----------|-----------------------|-----------|------------------|-----------|
| Source Type | ESI      | Ion Polarity          | Positive  | Set Nebulizer    | 1.2 Bar   |
| Focus       | Active   | Set Capillary         | 4500 V    | Set Dry Heater   | 200 °C    |
| Scan Begin  | 50 m/z   | Set End Plate Offset  | -500 V    | Set Dry Gas      | 7.0 l/min |
| Scan End    | 3000 m/z | Set Collision Cell RF | 130.0 Vpp | Set Divert Valve | Waste     |

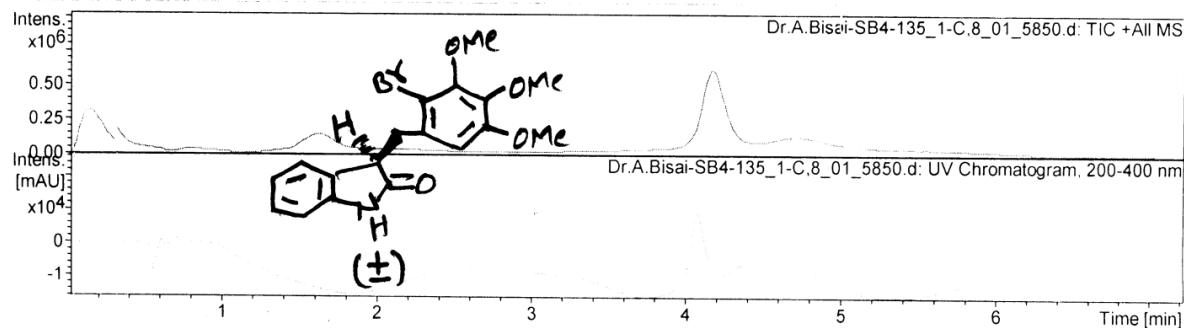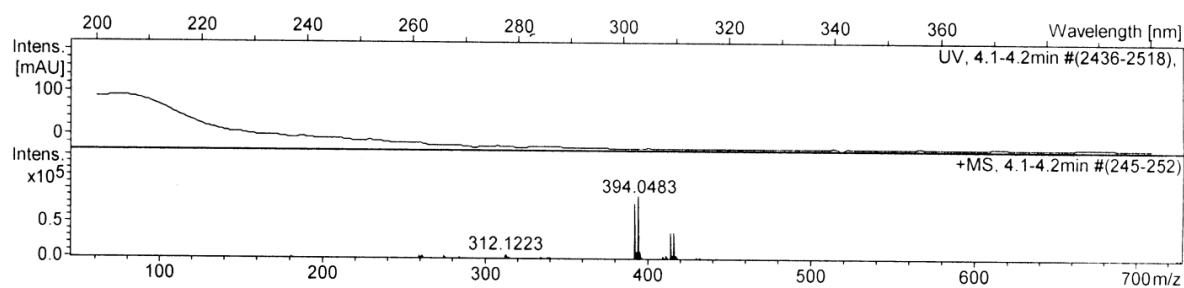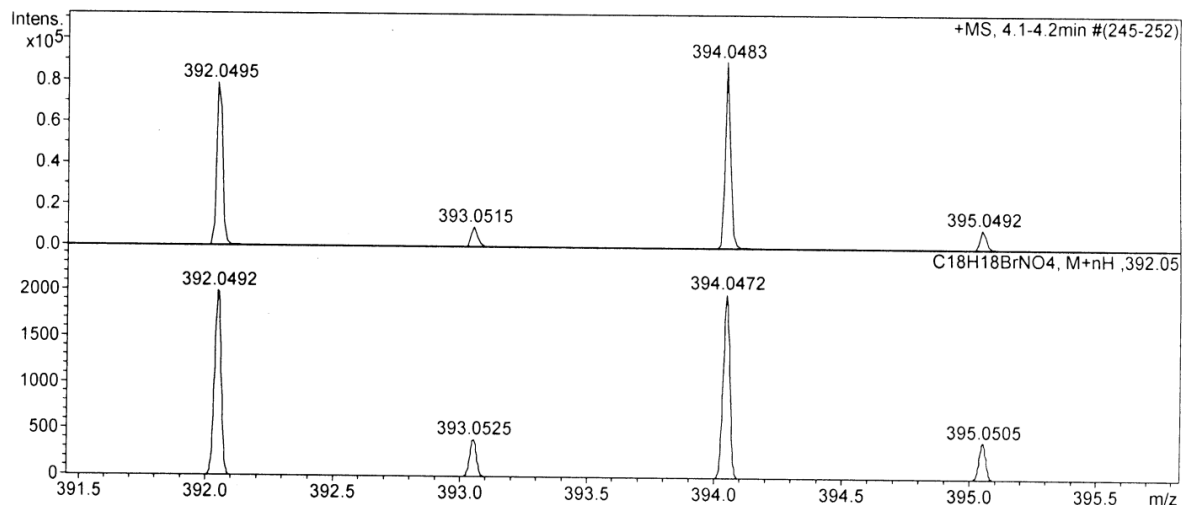

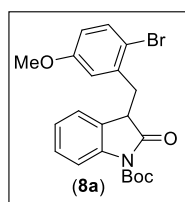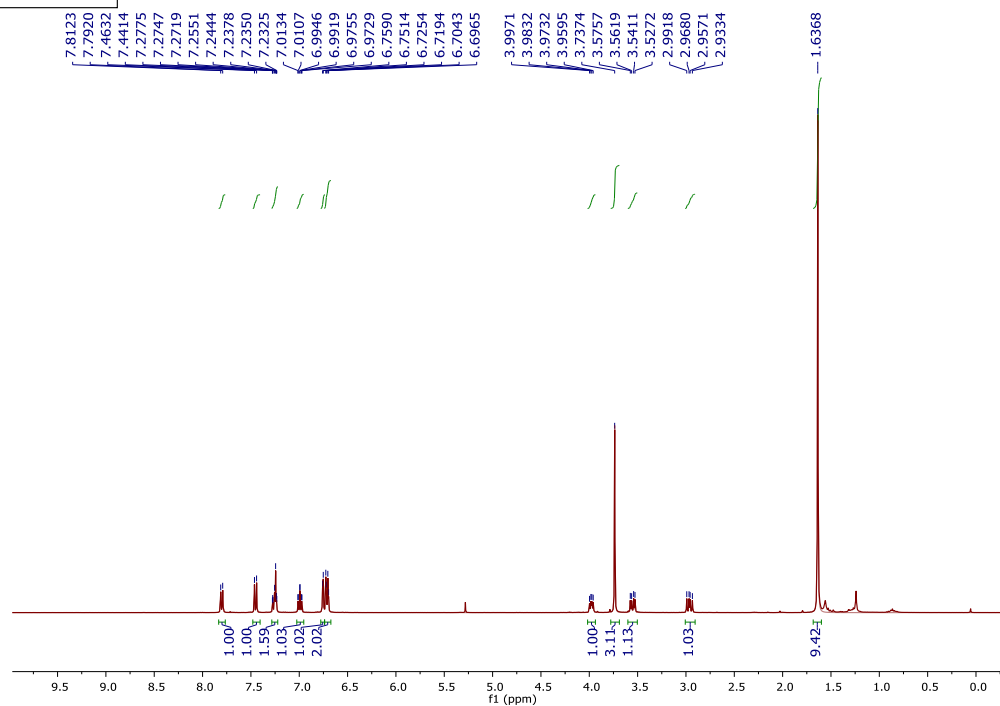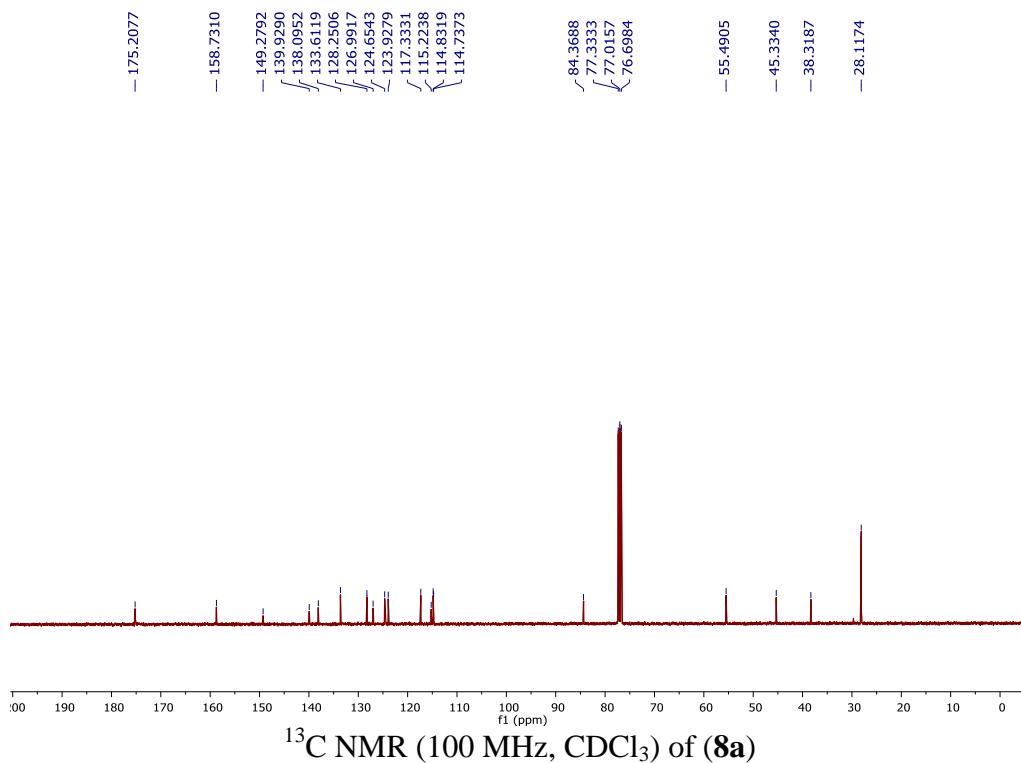

## Display Report

## Analysis Info

Analysis Name F:\2016\April 2016\18-04-2016\Dr.A.Bisai-KNB-01-069\_1-A,5\_01\_5882.d Acquisition Date 18-04-2016 13:24:50  
Method HRLCMS-20 Sept tune wide.m Operator DIMPLE  
Sample Name Dr.A.Bisai-KNB-01-069 Instrument microTOF-Q II 10330  
Comment

## Acquisition Parameter

|             |            |                       |           |                  |           |
|-------------|------------|-----------------------|-----------|------------------|-----------|
| Source Type | ESI        | Ion Polarity          | Positive  | Set Nebulizer    | 1.2 Bar   |
| Focus       | Not active | Set Capillary         | 4500 V    | Set Dry Heater   | 200 °C    |
| Scan Begin  | 50 m/z     | Set End Plate Offset  | -500 V    | Set Dry Gas      | 7.0 l/min |
| Scan End    | 3000 m/z   | Set Collision Cell RF | 600.0 Vpp | Set Divert Valve | Waste     |

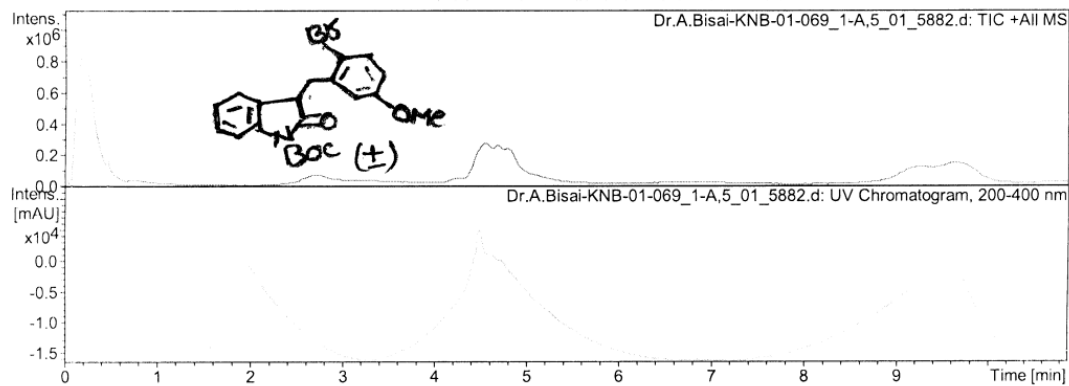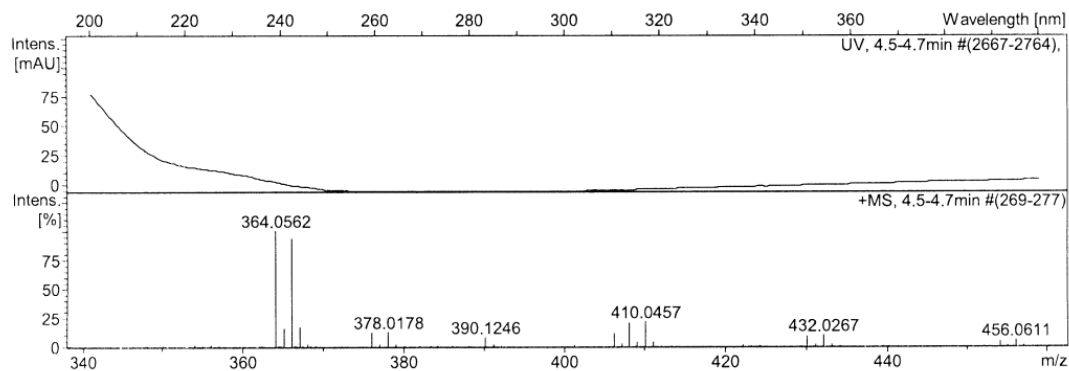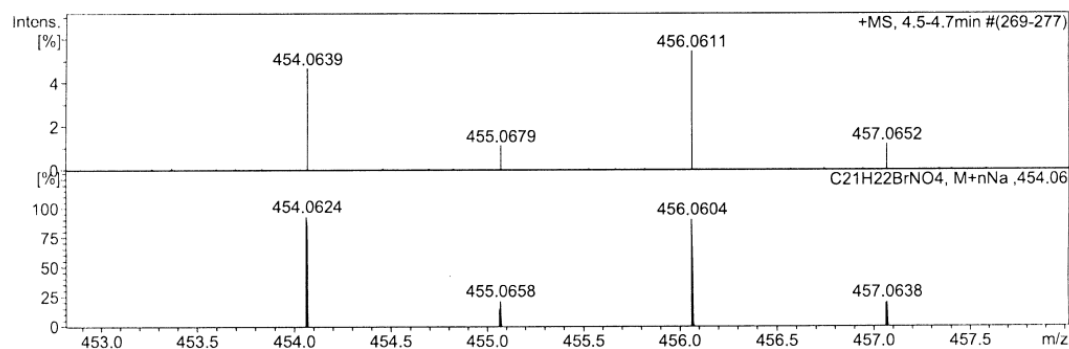

Scanned copy of mass spectrum of (8a)

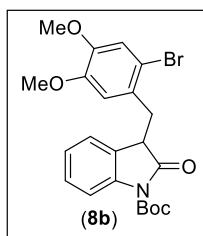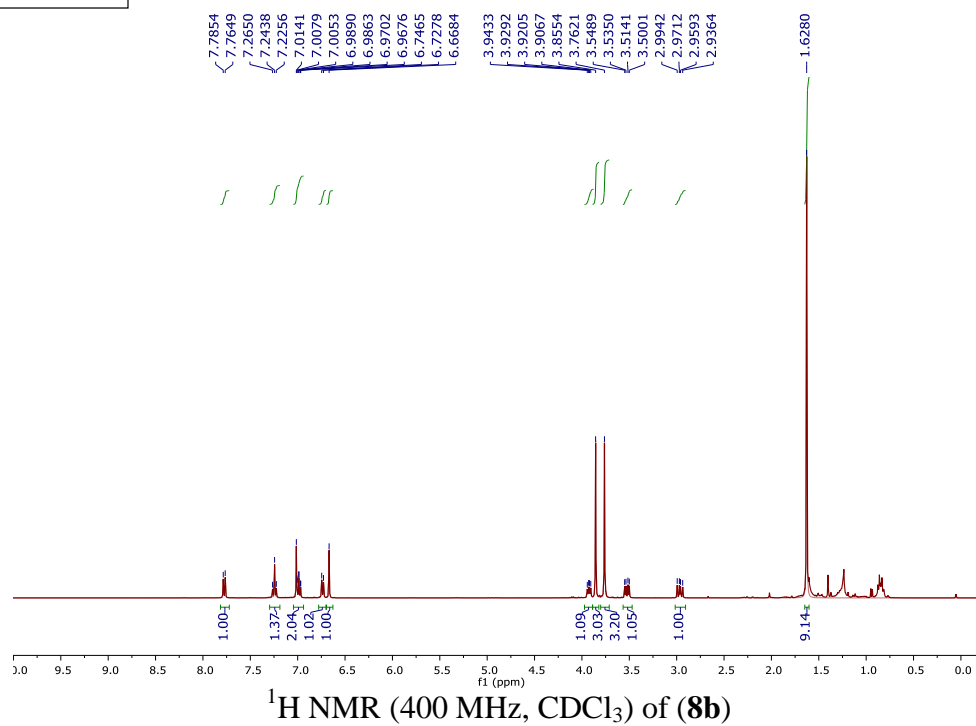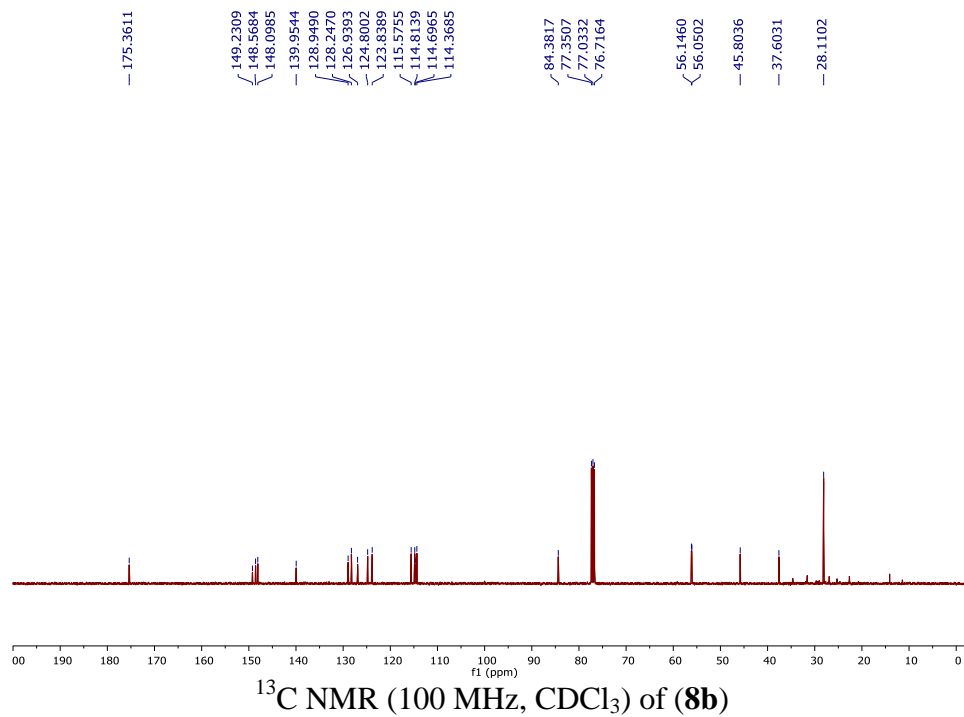

## Display Report

## Analysis Info

Analysis Name D:\Data\user data\2016\April 2016\12-04-2016\Dr.A.Bisai-SB4-136\_1-C,6\_01\_5848.d  
 Method HRLCMS-20 Sept tune wide.m  
 Sample Name Dr.A.Bisai-SB4-136  
 Comment

Acquisition Date 4/12/2016 3:00:57 PM

Operator DIMPLE

Instrument micrOTOF-Q II 10330

## Acquisition Parameter

|             |            |                       |           |                  |           |
|-------------|------------|-----------------------|-----------|------------------|-----------|
| Source Type | ESI        | Ion Polarity          | Positive  | Set Nebulizer    | 1.2 Bar   |
| Focus       | Not active | Set Capillary         | 4500 V    | Set Dry Heater   | 200 °C    |
| Scan Begin  | 50 m/z     | Set End Plate Offset  | -500 V    | Set Dry Gas      | 7.0 l/min |
| Scan End    | 3000 m/z   | Set Collision Cell RF | 600.0 Vpp | Set Divert Valve | Waste     |

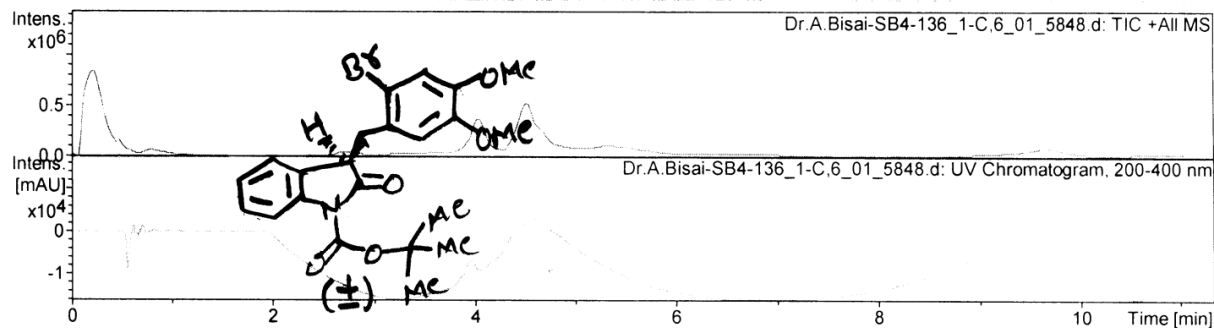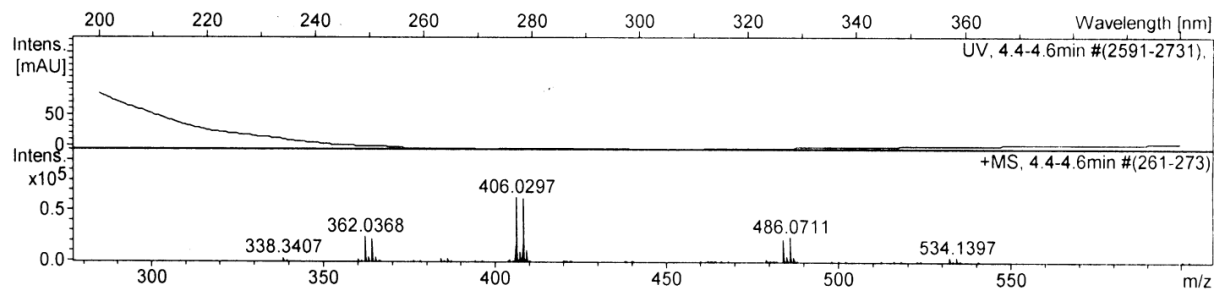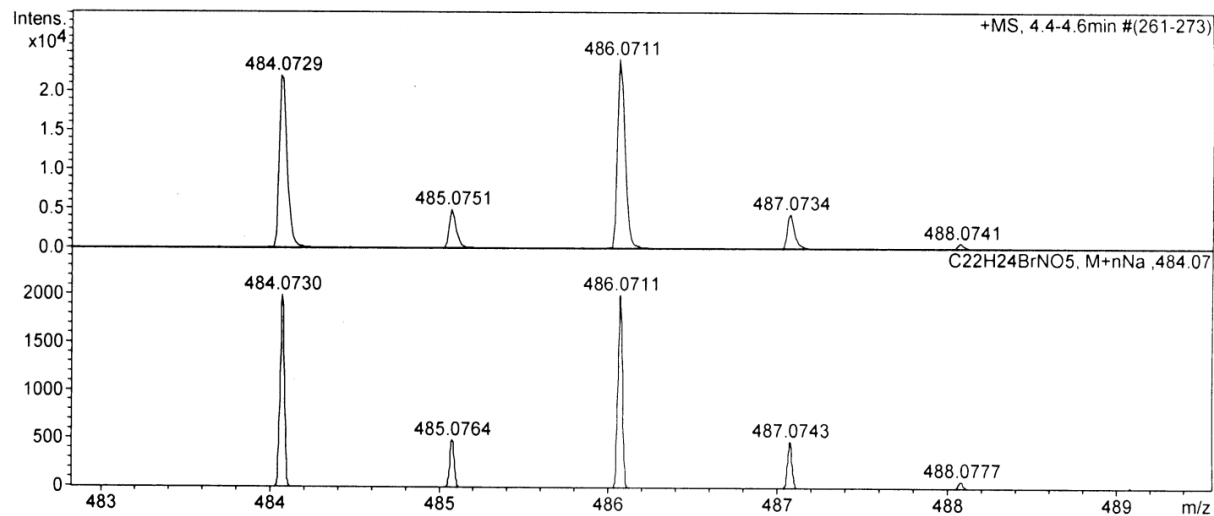

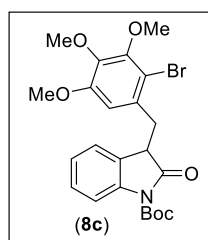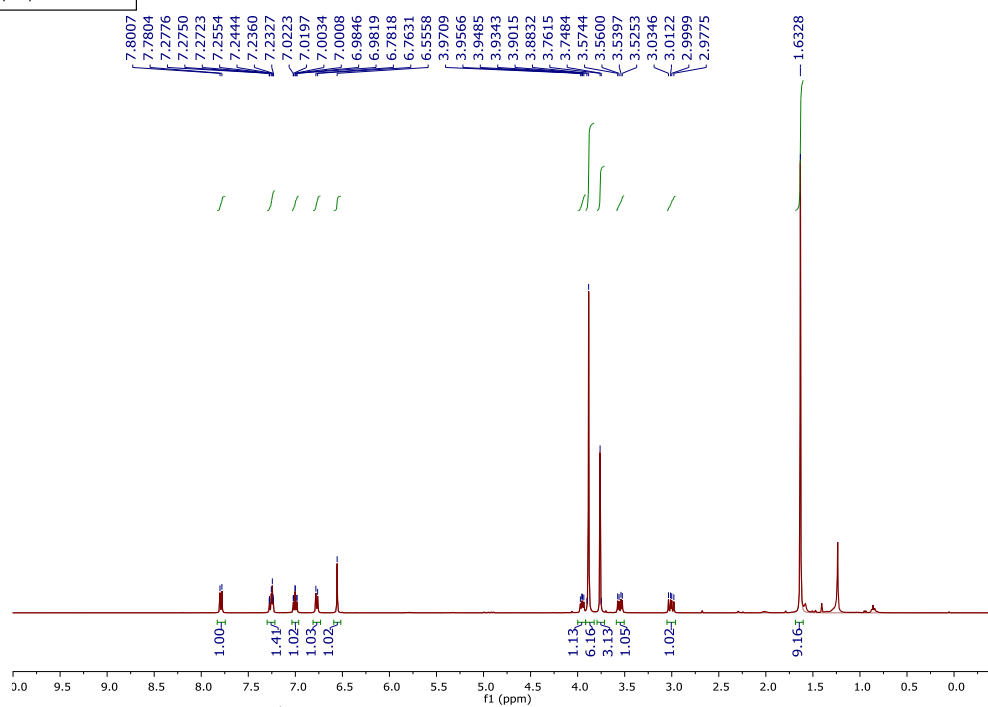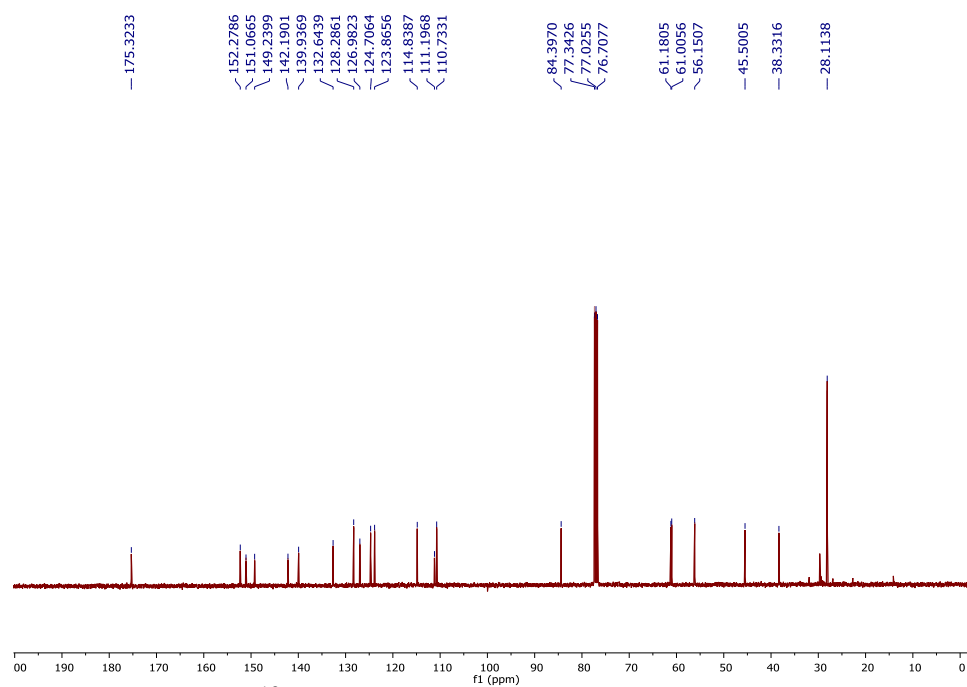

## Display Report

## Analysis Info

Analysis Name D:\Data\user data\2016\April 2016\13-04-2016\Dr.A.Bisai-KNB-01-067\_1-A,7\_01\_5875.d  
 Method HRLCMS-20 Sept tune wide.m  
 Sample Name Dr.A.Bisai-KNB-01-067  
 Comment

Acquisition Date 4/13/2016 2:18:03 PM

Operator DIMPLE

Instrument micrOTOF-Q II 10330

## Acquisition Parameter

|             |            |                       |           |                  |           |
|-------------|------------|-----------------------|-----------|------------------|-----------|
| Source Type | ESI        | Ion Polarity          | Positive  | Set Nebulizer    | 1.2 Bar   |
| Focus       | Not active | Set Capillary         | 4500 V    | Set Dry Heater   | 200 °C    |
| Scan Begin  | 50 m/z     | Set End Plate Offset  | -500 V    | Set Dry Gas      | 7.0 l/min |
| Scan End    | 3000 m/z   | Set Collision Cell RF | 600.0 Vpp | Set Divert Valve | Waste     |

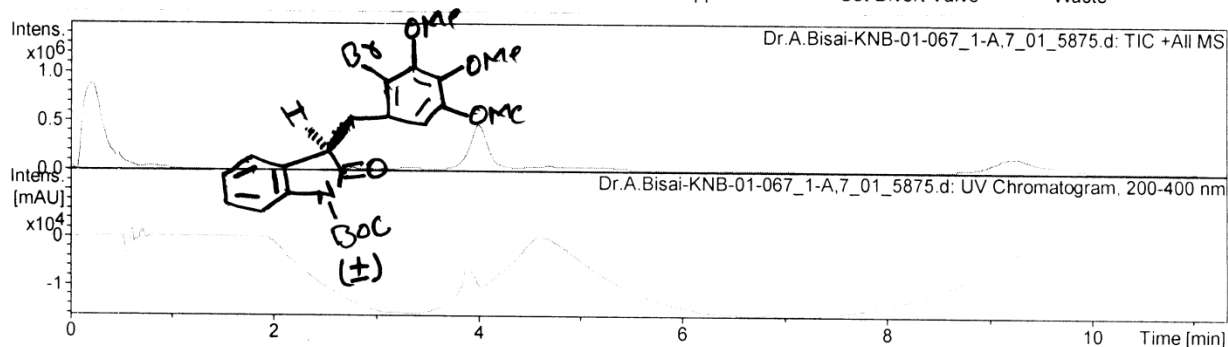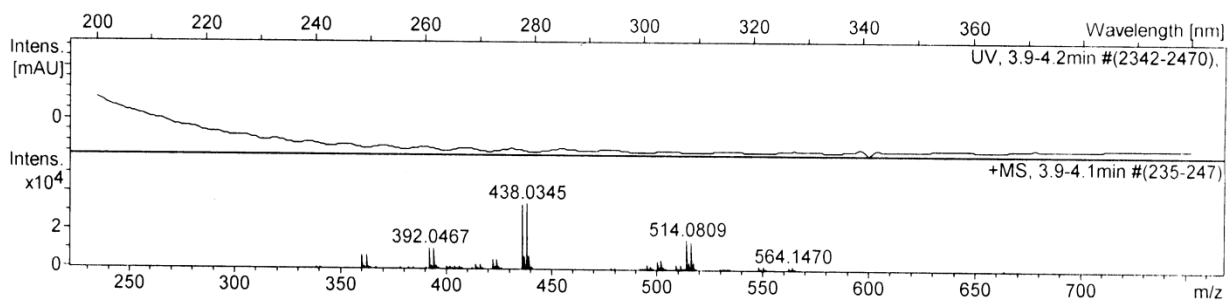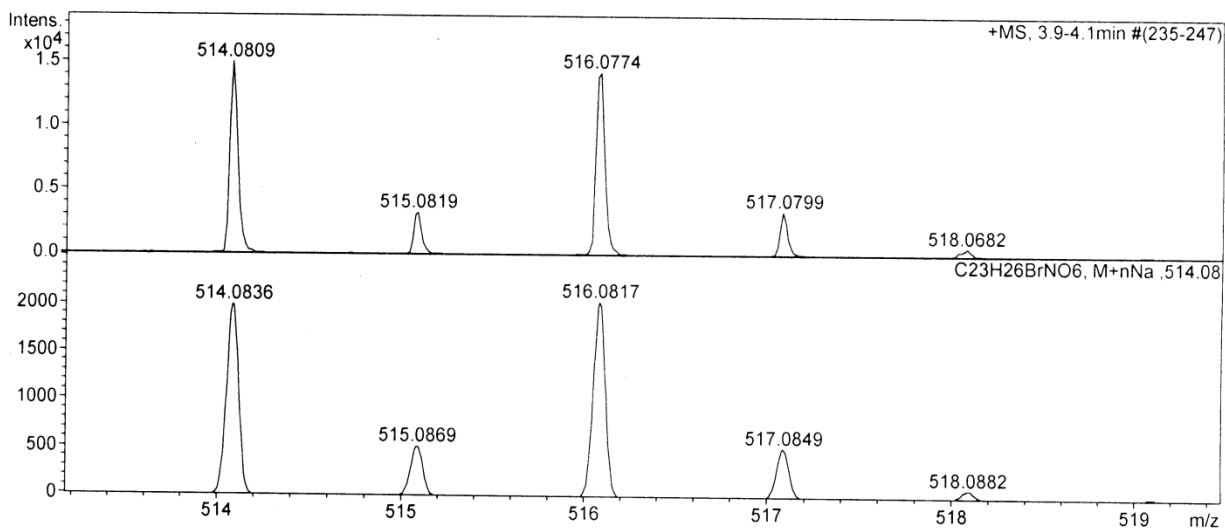

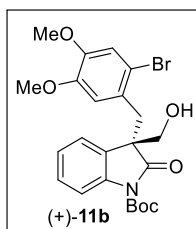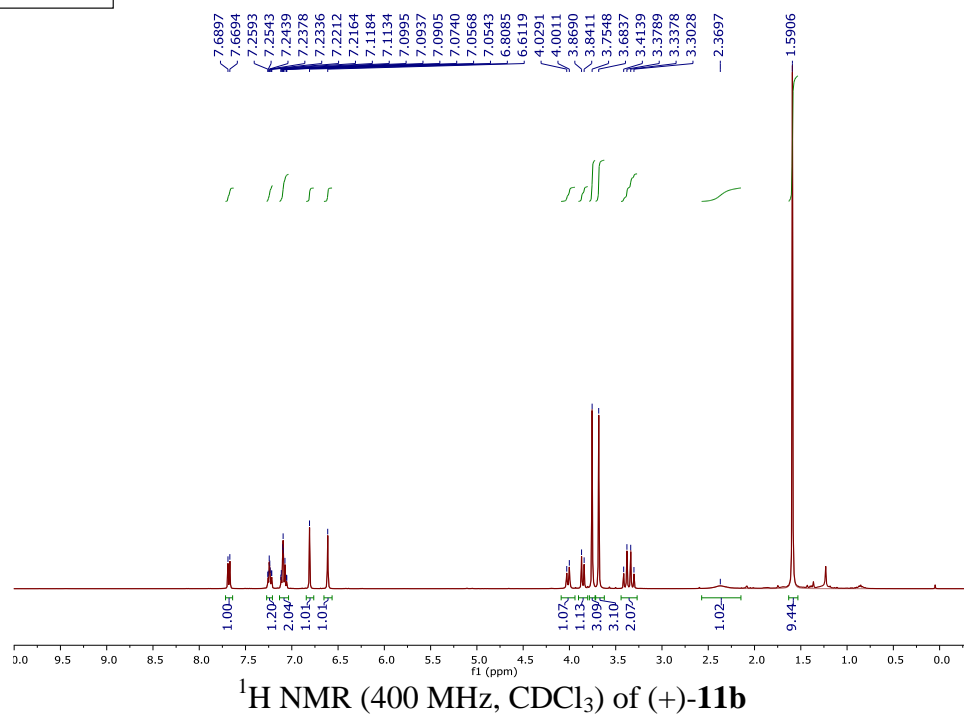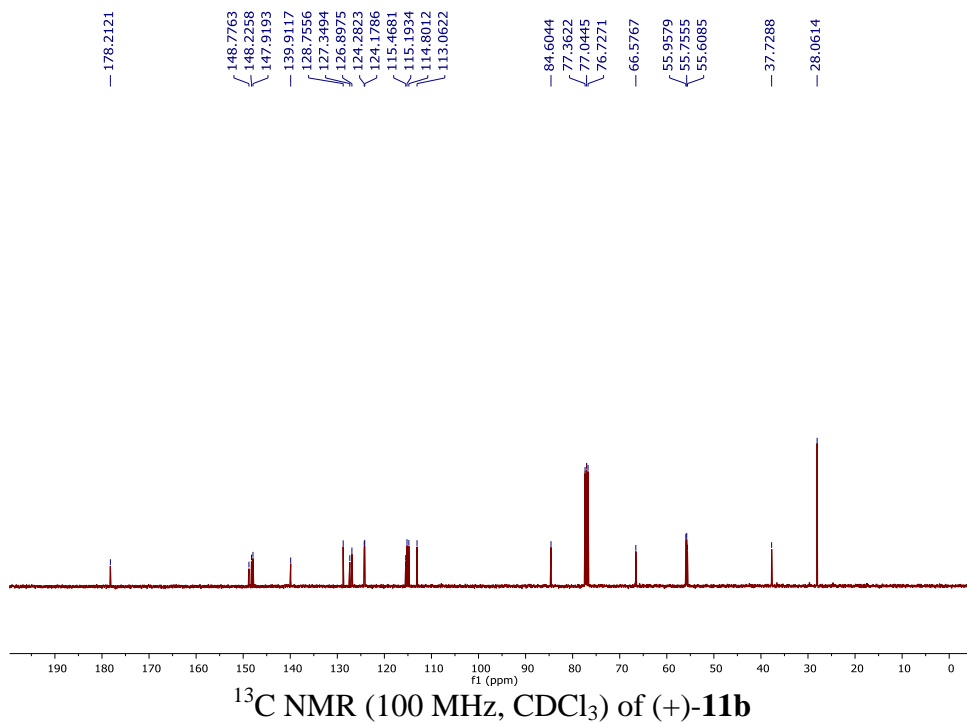



## Display Report

## Analysis Info

Analysis Name D:\Data\user data\2016\April 2016\13-04-2016\Dr.A.Bisai-KNB-01-066\_1-A,6\_01\_5874.d  
Method HRLCMS-20 Sept tune wide.m  
Sample Name Dr.A.Bisai-KNB-01-066  
Comment

Acquisition Date 4/13/2016 2:05:53 PM

Operator DIMPLe

Instrument micrOTOF-Q II 10330

## Acquisition Parameter

|             |            |                       |           |                  |           |
|-------------|------------|-----------------------|-----------|------------------|-----------|
| Source Type | ESI        | Ion Polarity          | Positive  | Set Nebulizer    | 1.2 Bar   |
| Focus       | Not active | Set Capillary         | 4500 V    | Set Dry Heater   | 200 °C    |
| Scan Begin  | 50 m/z     | Set End Plate Offset  | -500 V    | Set Dry Gas      | 7.0 l/min |
| Scan End    | 3000 m/z   | Set Collision Cell RF | 600.0 Vpp | Set Divert Valve | Waste     |

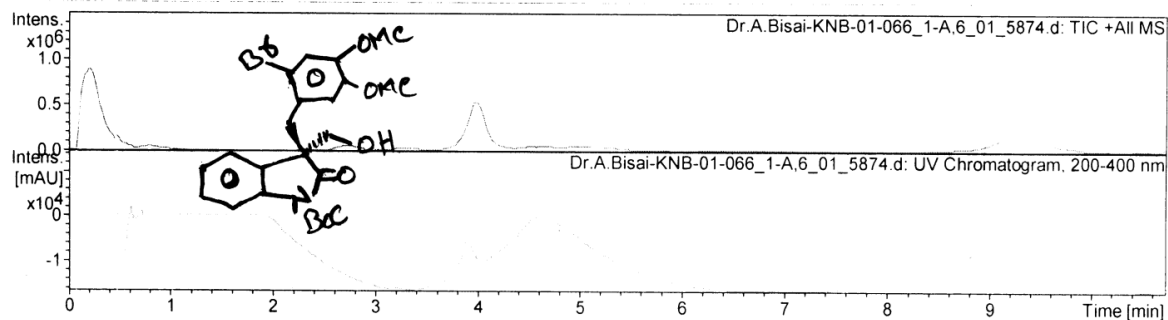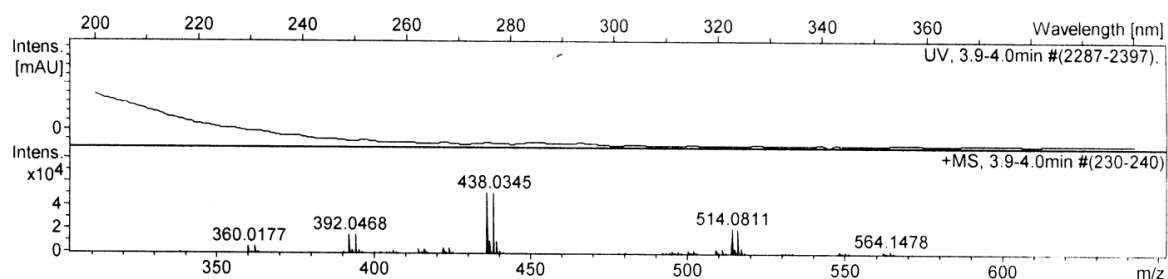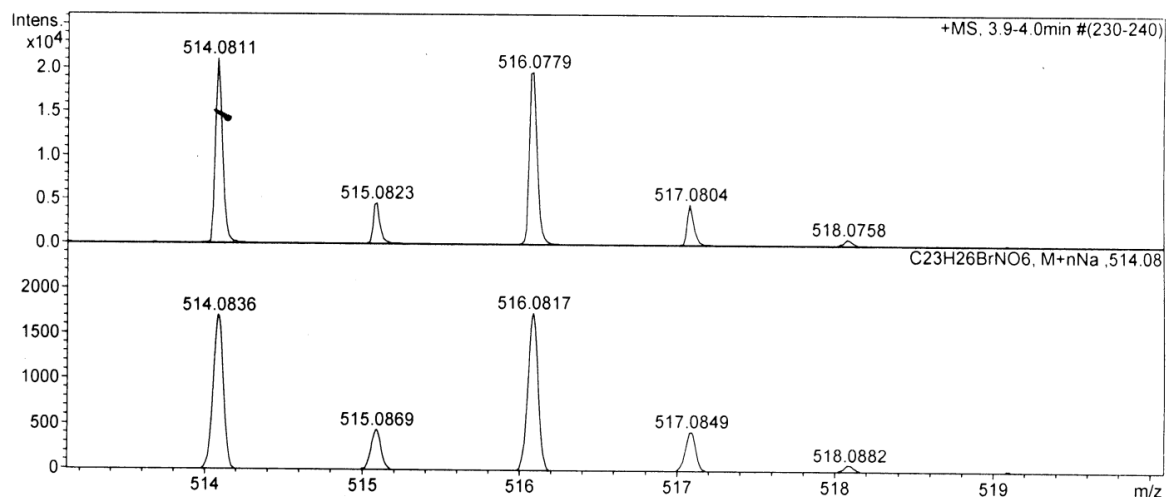

**HPLC traces of compound (+)-11b:**

Data File C:\CHEM32\1\DATA\SUBHAJIT\2014-03-25AB-KNB1-066-IA-10-254-1-60.D

Sample Name: AB-KNB1-066-IA-10-254-1-60

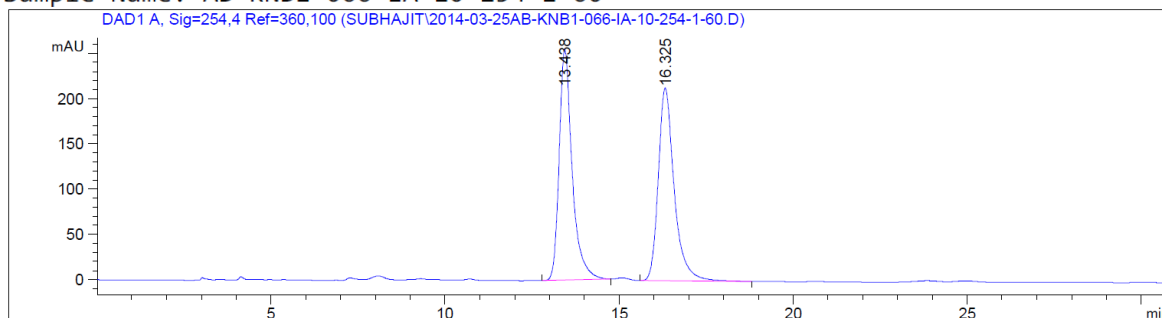

| Peak # | RetTime [min] | Type | Width [min] | Area [mAU*s] | Height [mAU] | Area %  |
|--------|---------------|------|-------------|--------------|--------------|---------|
| 1      | 13.438        | BB   | 0.3870      | 6626.07080   | 255.15839    | 49.4599 |
| 2      | 16.325        | BB   | 0.4747      | 6770.77588   | 213.09705    | 50.5401 |

Totals : 1.33968e4 468.25543

**Racemic**

Data File C:\CHEM32\1\DATA\SUBHAJIT\SB7-188-IA-10-254-1-30.D

Sample Name: SB7-188-IA-10-254-1-30

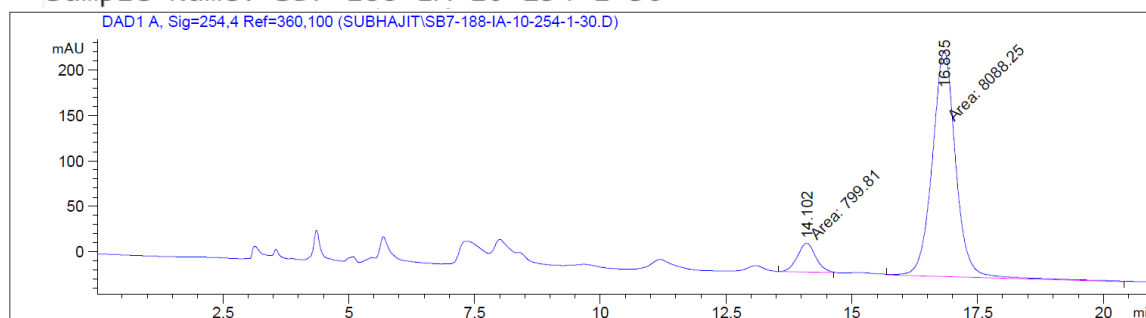

| Peak # | RetTime [min] | Type | Width [min] | Area [mAU*s] | Height [mAU] | Area %  |
|--------|---------------|------|-------------|--------------|--------------|---------|
| 1      | 14.102        | MM   | 0.4203      | 799.80957    | 31.71591     | 8.9987  |
| 2      | 16.835        | MM   | 0.5432      | 8088.24951   | 248.14471    | 91.0013 |

Totals : 8888.05908 279.86062

**Enantiopure**

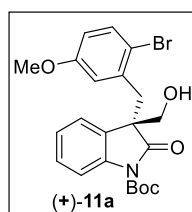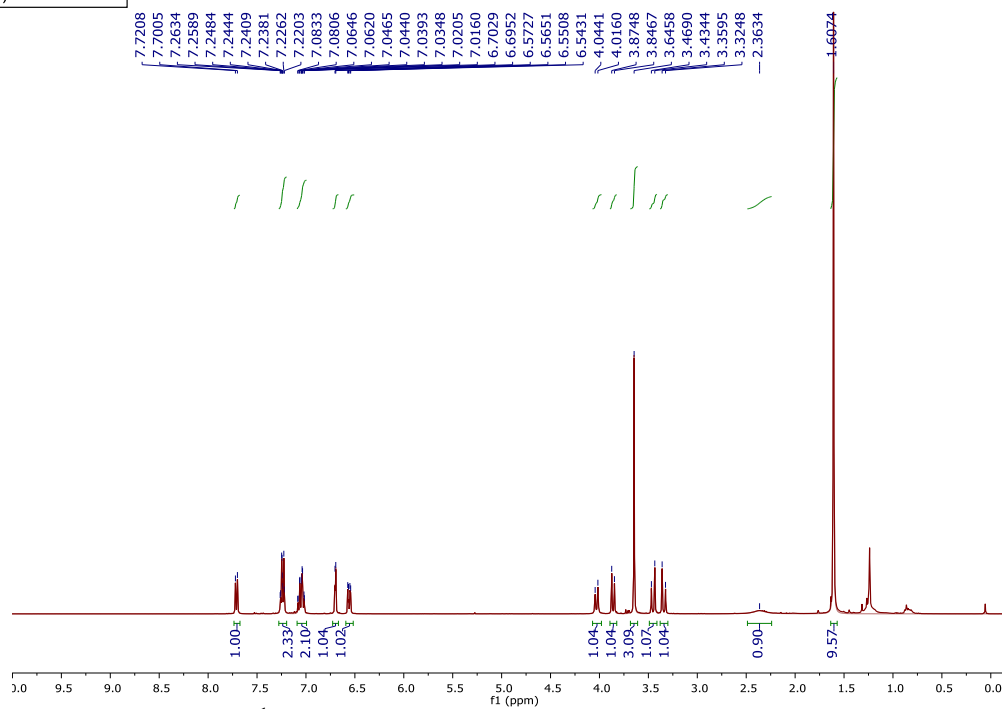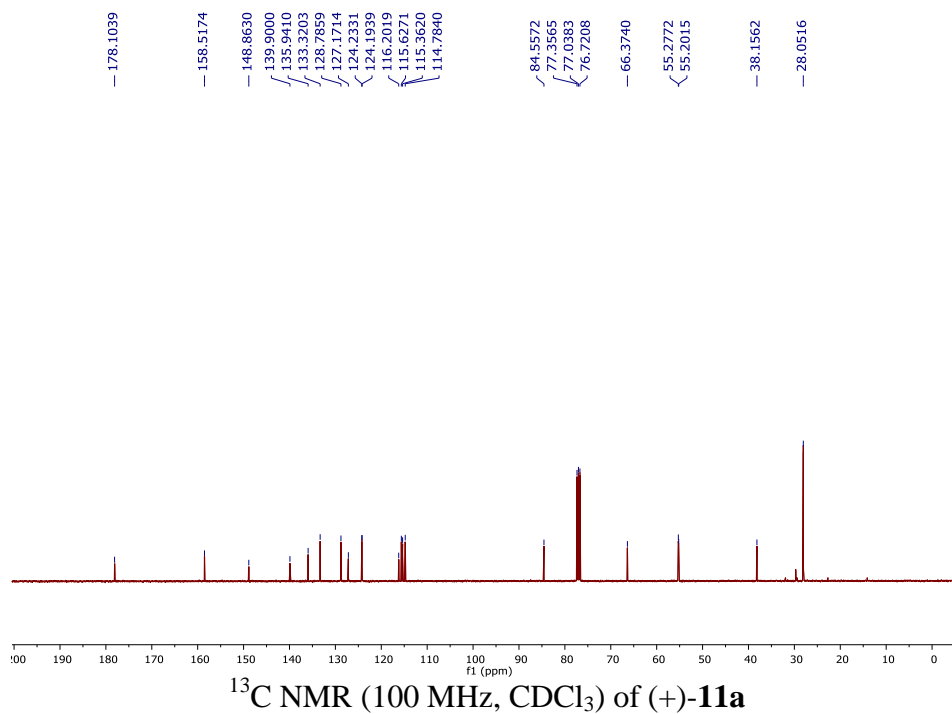

## Display Report

## Analysis Info

Analysis Name D:\Data\user data\2016\April 2016\18-04-2016\Dr.A.Bisai-KNB-01-71\_1-A,6\_01\_5883.d  
 Method HRLCMS-20 Sept tune wide.m  
 Sample Name Dr.A.Bisai-KNB-01-71  
 Comment

Acquisition Date 4/18/2016 1:36:58 PM

Operator DIMPLE

Instrument micrOTOF-Q II 10330

## Acquisition Parameter

|             |            |                       |           |                  |           |
|-------------|------------|-----------------------|-----------|------------------|-----------|
| Source Type | ESI        | Ion Polarity          | Positive  | Set Nebulizer    | 1.2 Bar   |
| Focus       | Not active | Set Capillary         | 4500 V    | Set Dry Heater   | 200 °C    |
| Scan Begin  | 50 m/z     | Set End Plate Offset  | -500 V    | Set Dry Gas      | 7.0 l/min |
| Scan End    | 3000 m/z   | Set Collision Cell RF | 600.0 Vpp | Set Divert Valve | Waste     |

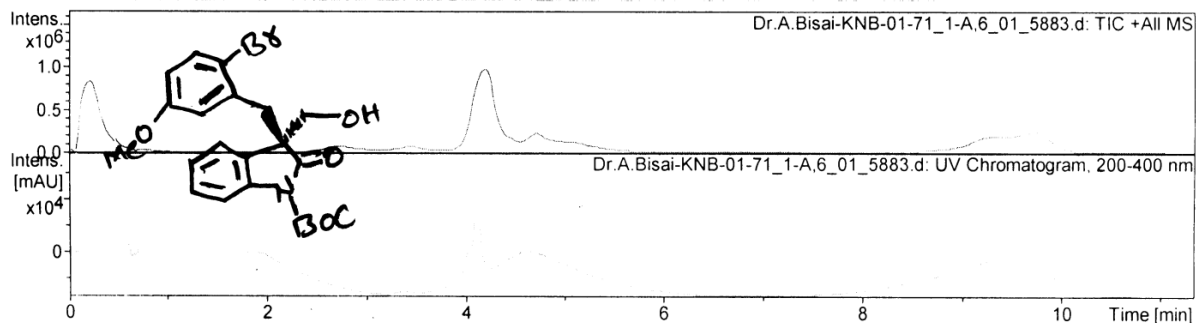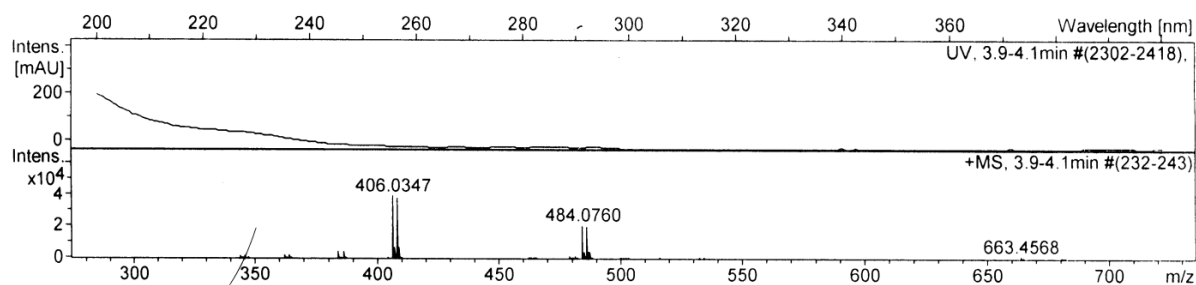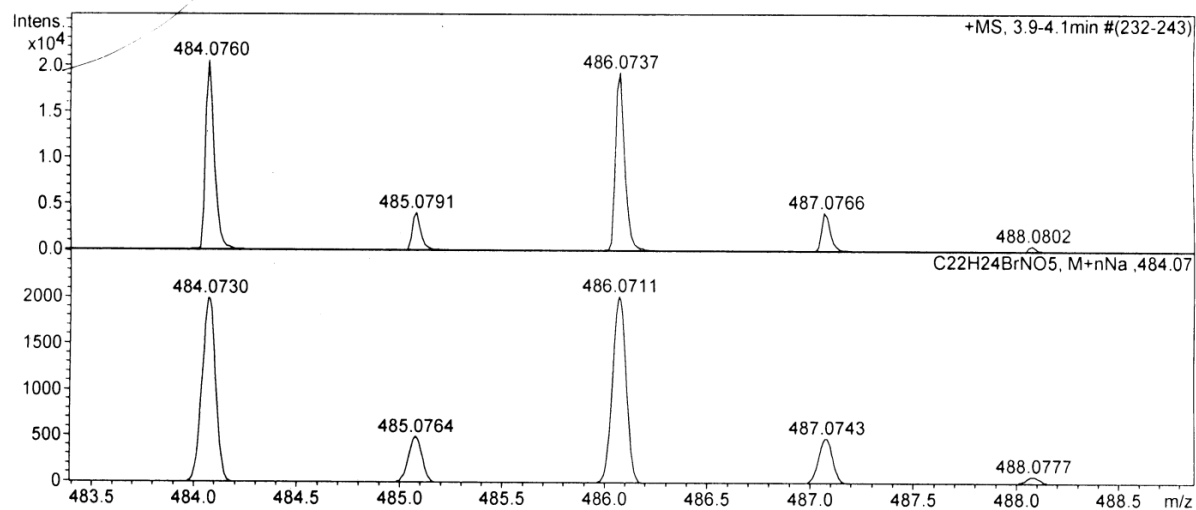

Bruker Compass DataAnalysis 4.0

printed: 4/18/2016 3:41:22 PM

Page 1 of 1

Scanned copy of mass spectrum of (+)-11a

**HPLC traces of compound (+)-11a:**

Data File C:\CHEM32\1\DATA\SUBHAJIT\SB7-210-IA-10-1-254-60.D

Sample Name: SB7-210-IA-10-1-254-60

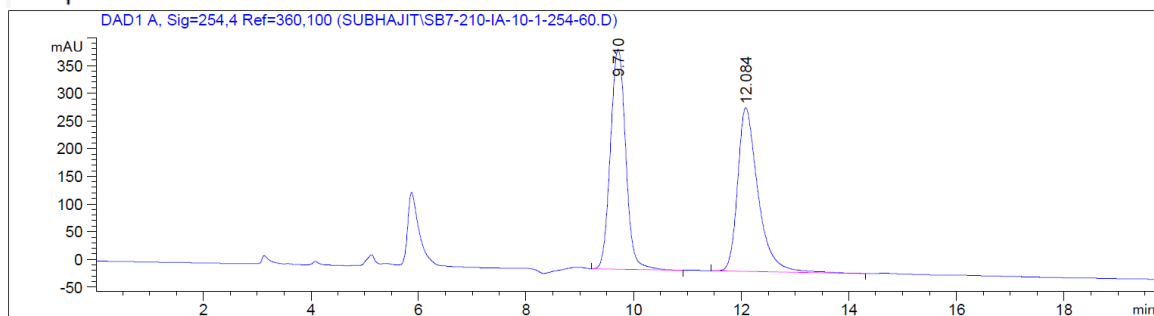

| Peak # | RetTime [min] | Type | Width [min] | Area [mAU*s] | Height [mAU] | Area %  |
|--------|---------------|------|-------------|--------------|--------------|---------|
| 1      | 9.710         | BB   | 0.3107      | 7849.70459   | 396.89224    | 50.2048 |
| 2      | 12.084        | BB   | 0.3917      | 7785.66992   | 295.22726    | 49.7952 |

Totals : 1.56354e4 692.11951

**Racemic**

Data File C:\CHEM32\1\DATA\SUBHAJIT\SB7-209-IA-10-1-254-60.D

Sample Name: SB7-209-IA-10-1-254-60

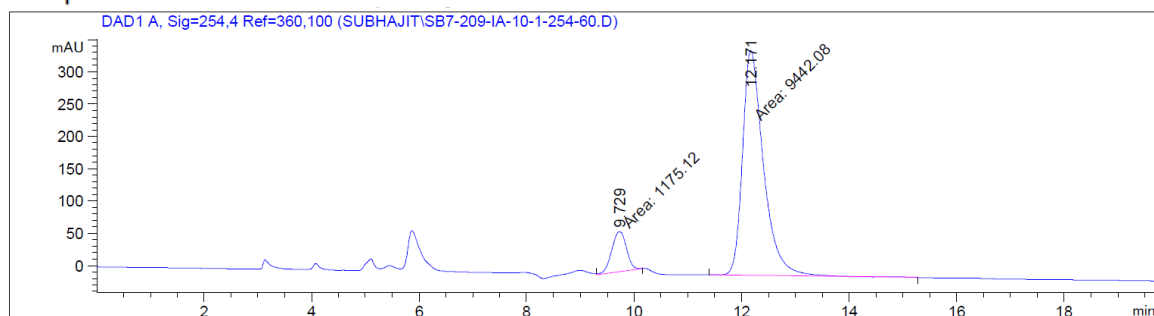

| Peak # | RetTime [min] | Type | Width [min] | Area [mAU*s] | Height [mAU] | Area %  |
|--------|---------------|------|-------------|--------------|--------------|---------|
| 1      | 9.729         | MM   | 0.3159      | 1175.11914   | 62.00706     | 11.0681 |
| 2      | 12.171        | MM   | 0.4521      | 9442.07715   | 348.08295    | 88.9319 |

Totals : 1.06172e4 410.09001

**Enantiopure**

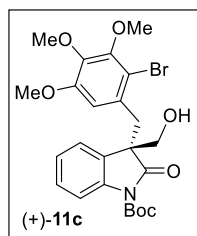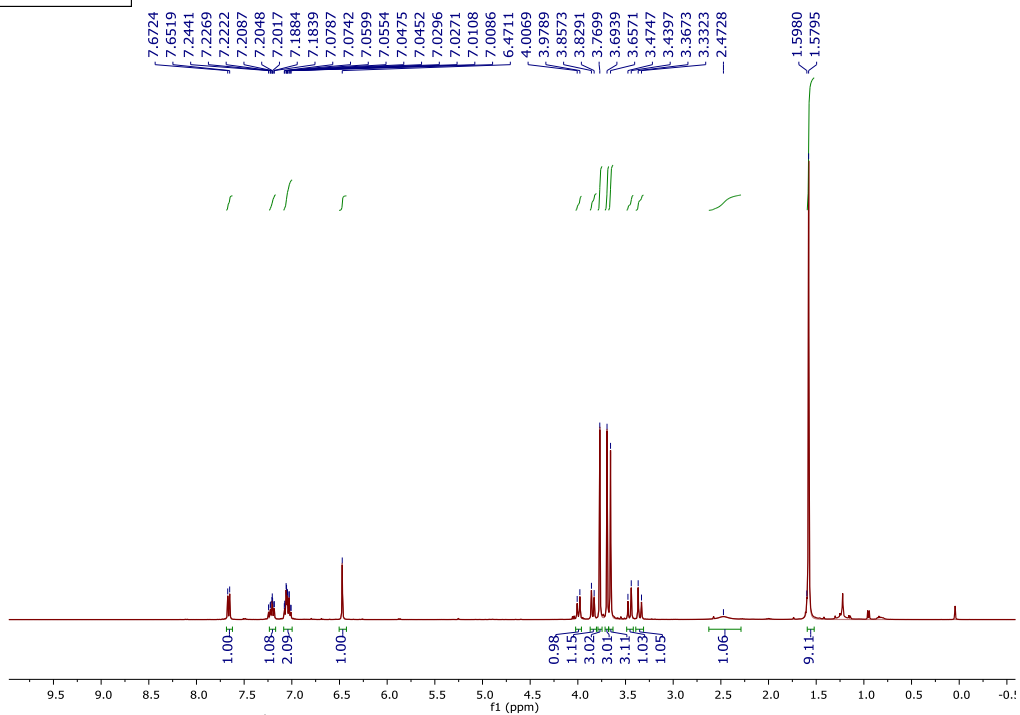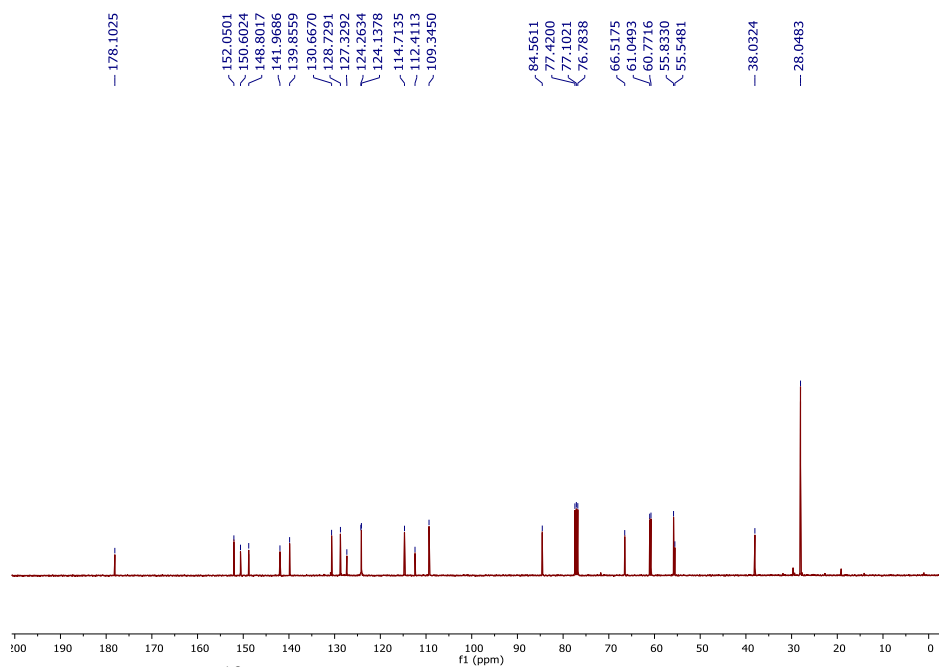

## Display Report

## Analysis Info

Analysis Name D:\Data\user data\2016\April 2016\18-04-2016\Dr.A.Bisai-KNB-01-068\_1-A,4\_01\_5880.d  
 Method HRLCMS-20 Sept tune wide.m  
 Sample Name Dr.A.Bisai-KNB-01-068  
 Comment

Acquisition Date 4/18/2016 1:00:28 PM

Operator DIMPLE

Instrument micrOTOF-Q II 10330

## Acquisition Parameter

|             |            |                       |           |                  |           |
|-------------|------------|-----------------------|-----------|------------------|-----------|
| Source Type | ESI        | Ion Polarity          | Positive  | Set Nebulizer    | 1.2 Bar   |
| Focus       | Not active | Set Capillary         | 4500 V    | Set Dry Heater   | 200 °C    |
| Scan Begin  | 50 m/z     | Set End Plate Offset  | -500 V    | Set Dry Gas      | 7.0 l/min |
| Scan End    | 3000 m/z   | Set Collision Cell RF | 600.0 Vpp | Set Divert Valve | Waste     |

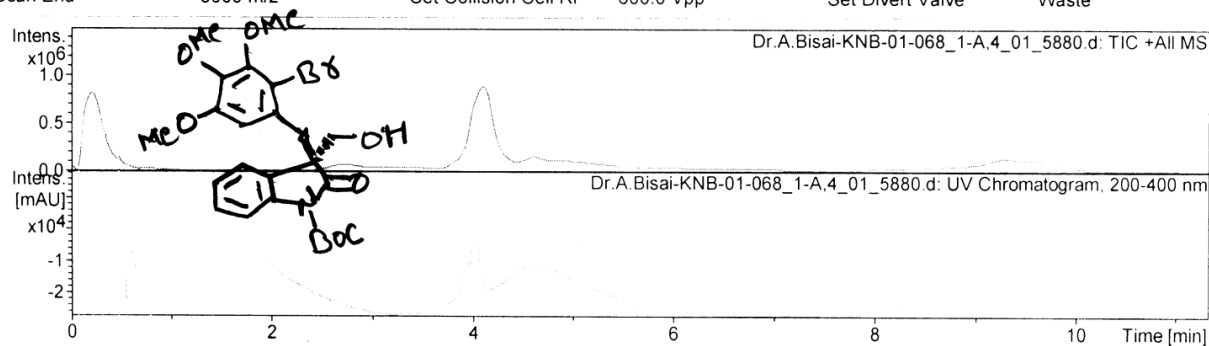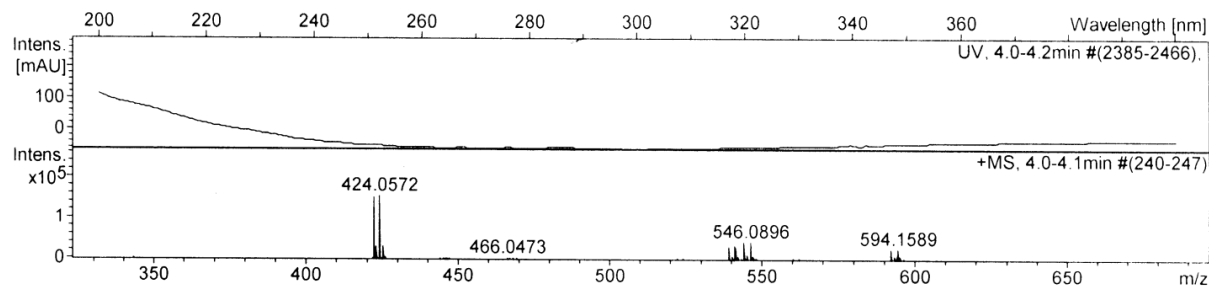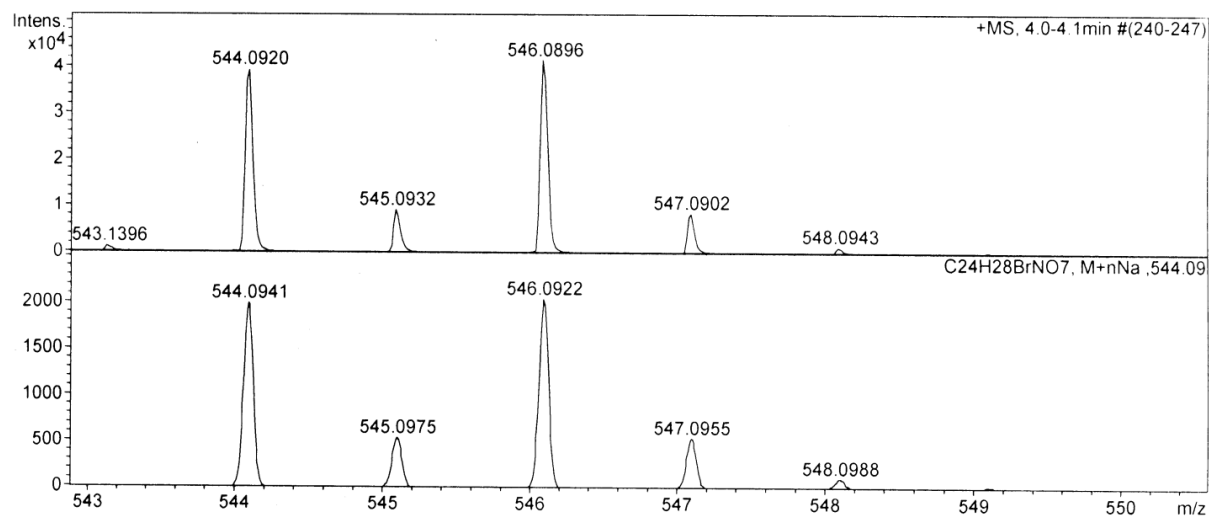

**HPLC traces of compound (+)-11c:**

Data File C:\CHEM32\1\DATA\SUBHAJIT\KNB-01-068-IA-15-254-1-30.D

Sample Name: KNB-01-068-IA-15-254-1-30

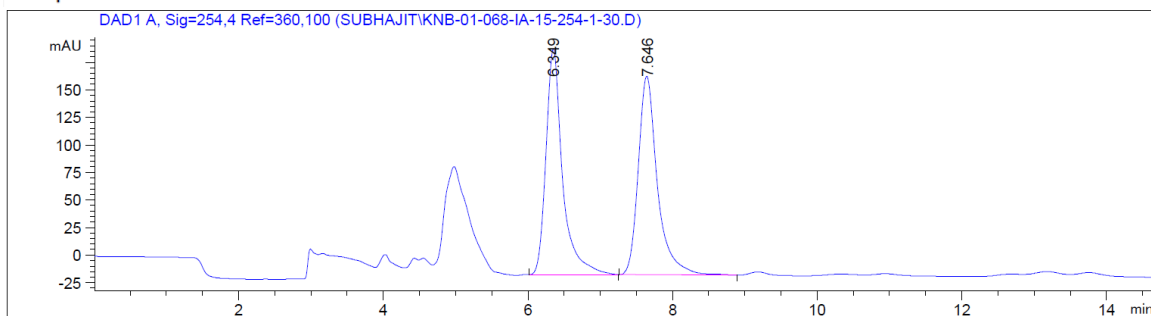

| Peak # | RetTime [min] | Type | Width [min] | Area [mAU*s] | Height [mAU] | Area %  |
|--------|---------------|------|-------------|--------------|--------------|---------|
| 1      | 6.349         | BB   | 0.2381      | 3264.98999   | 204.68718    | 49.6223 |
| 2      | 7.646         | BB   | 0.2748      | 3314.69849   | 180.06126    | 50.3777 |

Totals : 6579.68848 384.74844

**Racemic**

Data File C:\CHEM32\1\DATA\SUBHAJIT\SB-07-201-IA-15-254-1-30.D

Sample Name: SB-07-201-IA-15-254-1-30

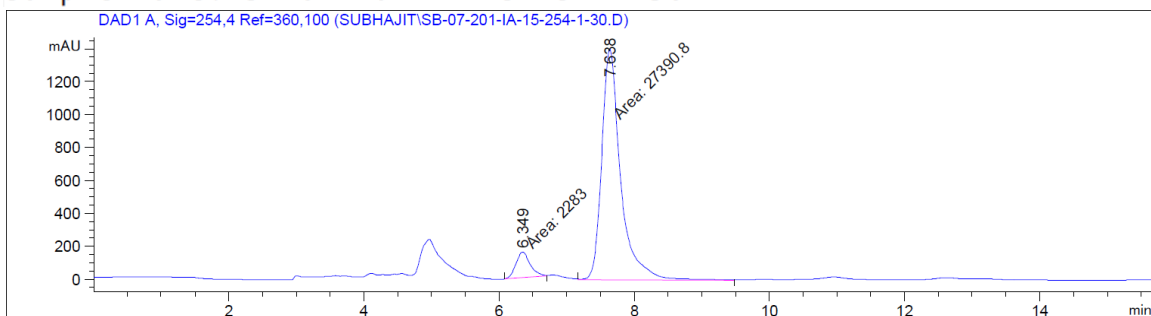

| Peak # | RetTime [min] | Type | Width [min] | Area [mAU*s] | Height [mAU] | Area %  |
|--------|---------------|------|-------------|--------------|--------------|---------|
| 1      | 6.349         | MM   | 0.2436      | 2282.99658   | 156.16652    | 7.6936  |
| 2      | 7.638         | MM   | 0.3253      | 2.73908e4    | 1403.34412   | 92.3064 |

Totals : 2.96738e4 1559.51064

**Enantiopure**
